# Supplementary material
Source: Research Square preprint supplement (doi:10.21203/rs.3.rs-8947272/v1)
Supplement: Supplementary file 1 [file a95cd41279ac04ddd20eba7a.xlsx]

## Sheet: LOG OF DATA 
FOLDER	FILENAME	NOTES	WEBCAM	START DATE	START TIME	END DATE	END TIME	START OF ERUPTION?	NUMBER OF FILES	LEFT IS	RIGHT IS
webcam_reykjanesUnrest	2023_Dec	description of the different fissures and firefountains through time during the eruptuions. Shows the fissure segment lengths, propogation speeds and timings. Description of which fissures are active at what time through the eruption for the december eruption
webcam_reykjanesUnrest	2024_01_JAN14-16	the same but for the january eruption
webcam_reykjanesUnrest	2024_02_Feb8-9	same but for the february eruption
webcam_reykjanesUnrest	2024_03_March16-May8	empty spreadsheet of the same type as the other eruptions, I guess im supposed to fill it in?
webcam_reykjanesUnrest	2024_04_May9	another empty spreadsheet
01_Dec18	LFI_langihryggur_2023-12-18T230000	footage is really low quality, view of whole lava field but quite blurry, but can see the different segments	LFI langihryggur	2023-12-18	23:00:00	2023-12-21	00:00:00	no	62	south	north
01_Dec18	MBL_webcam1_2023-12-18T220000	see the start of the eruption and the opening of the fissures and their extension, good quality imagery, we are slightly oblique to the fissure, camera doesn’t move and fissure goes off the end	MBL webcam1	2023-12-18	22:00:00	2023-12-21	00:00:00	yes	62	north	south
01_Dec18	MBL_webcam2x_2023-12-18T220000	some of the hours appear to be corrupted and I cant open them including the file that contains the start of the eruption. More distant view of the eruption, but can see the whole length of the fissure as it opens, rain somewhat obscures the view of fissure opening	MBL webcam2x	2023-12-18	22:00:00	2023-12-21	00:00:00	no	62	north	south
02_Jan14	LFI_reykjanes2_2024-01-14T100000-2	this camera moves around a lot to follow what appears to be the most exciting parts, but this means we don’t have a clear view of fissure opening, also footage starts after the start of the eruption	LFI reykjanes2	2024-01-14	10:00:00	2024-01-16	06:00:00	no	45
02_Jan14	LFI_visir2_2024-01-14T080000-2	this camera doesn’t appear to move, it is centered on grindavik which means you cant see the opening of the first fissure, reasonably low quality. Too far away to see the grindavik fissure clearly, and there is footage missing around the time when the fissure opens 20:00 APPEARS TO BE CORRUPTED	LFI visir2	2024-01-14	08:00:00	2024-01-16	01:00:00	no	43
02_Jan14	MBL_webcam1_2024-01-14T070000-2	this camera zooms in and out and is centered over the opening of the first fissure, so we can see this opening well. It moves to follow the most active part of the flow or to see the opening of the new fissure	MBL webcam1	2024-01-14	07:00:00	2024-01-16	11:00:00	yes	54
02_Jan14	MBL_webcam2x_2024-01-14T060000-2	this webcam does not move, and a large hill obscures the majority of the veiw. Eruption is not quite centered and so is far away with poor image quality, but we can see a lot of half of the fissure The 8am footage is corrupted	MBL webcam2x	2024-01-14	07:00:00	2024-01-16	11:00:00	yes	55
02_Jan14	RUV4_2024-01-14T060000	this webcam moves to capture the most important part of the lava flow, this footage stops at 19:00 on the 14th and so doesn’t capture the end of the eruption.	RUV4	2024-01-14	06:00:00	2024-01-14	19:00:00	no	14
03_Feb8	LFI_langihryggur_2024-02-08T060000	this camera appears to move and zoom, it was not centered closely enough when the first fissure opened to see it the filed of veiw is then not wide enough to see the fissure grow	LFI langihryggur	2024-02-08	06:00:00	2024-02-09	09:00:00	yes	28	south	north
03_Feb8	LFI_reykjanes2_2024-01-14T060000-2	this footage appears to have been put in the wrong folder	LFI reykjanes2	2024-01-14	06:00:00	2024-01-14	09:00:00	no	5
03_Feb8	MBL_webcam1_2024-02-08T060000	the camera is originally not looking at the eruption, but moves to be centered on the eruption, so we miss the start of the eruption, we then have a good view of fissure propogation but are not looking perpendicular at the fissure	MBL webcam1	2024-02-08	06:00:00	2024-02-09	09:00:00	no	28	north	south
03_Feb8	MBL_webcam2x_2024-02-08T060000	We are centered on the start of the eruption so see it but are quite far away, but we see the fissure propogation well, this camera does not move	MBL webcam2x	2024-02-08	06:00:00	2024-02-09	09:00:00	yes	28	north	south
03_Feb8	RUV4_2024-02-08T060000	This camera moves and we do not capture the start of the eruption because it is facing the wrong way, we see fissure propogation well, but are looking obliquely at, similar viewpoint to webcam1. some low quality closeups	RUV4	2024-02-08	06:00:00	2024-02-09	02:00:00	no	21	north	south
03_Feb8	RUV5_2024-02-08T060000	We do not see the start of the eruption and the camera doesn’t move until after 7am. Camera does not zoom and the view is quite far away and oblique to the fissure with a few obscuring hills, so the view is not good	RUV5	2024-02-08	06:00:00	2024-02-09	02:00:00	no	21	north	south
04_March16	LFI_grindavik_2024-03-16T200000	we only have footage from this camera until 23:00 likely because it is a poor view, a ridge obscures where the fissure comes out of the ground so we can only see the top of the fire fountain	LFI grindavik	2024-03-16	20:00:00	2024-03-16	23:00:00	yes	4
04_March16	LFI_langihryggur_2024-03-16T200000	This camera moves and is originally well centered on the start of the eruption. It zooms out to see fissure propogation, but the edge of the fissure become obscured by mounds. low quality imagery during some nights. well centered on the active cones quite blurry	LFI langihryggur	2024-03-16	20:00:00	2024-04-07	00:00:00	yes	260
04_March16	LFI_reykjanes2_2024-03-16T190000	Good view of the start of eruption, but then too zoomed in to see fissure propogation, then a large mound obscures the view. Camera moves and zooms looks at edges of lava flows as well as fissure.	LFI reykjanes2	2024-03-16	19:00:00	2024-03-17	13:00:00	yes	19
04_March16	LFI_reykjanes3_2024-03-16T190000	See the start of the eruption and a great view of the fissure propogation, zooms out as fissure grows, but a bit delayed	LFI reykjanes3	2024-03-16	19:00:00	2024-03-16	22:00:00	yes	4
04_March16	LFI_svartsengi_2024-03-16T200000	Camera does not move and the eruption is not in the field of view. Past midnight we can see the lava approaching the power station	LFI svartsengi	2024-03-16	20:00:00	2024-03-17	02:00:00	no	7
04_March16	LFI_thorbjorn2_2024-03-16T200000	There does not appear to be a file for every hour and only have a 1 hour video every 2 or 3 hours later in the eruption. Camera is initially centered on the eruption when it starts and moves to follow fissure propogation. This camera is quite oblique to the fissure	LFI thorbjorn2	2024-03-16	20:00:00	2024-04-24	00:00:00	yes	283
04_March16	LFI_visir_2024-03-16T200000	Not centred on the eruption, can later see some lava flows but theyre far away, not useful	LFI visir	2024-03-16	20:00:00	2024-03-16	22:00:00	no	3
04_March16	LFI_visir2_2024-03-16T200000	Not looking at the eruption, we see a tiny amount of lava flows at 10pm not useful	LFI visir2	2024-03-16	20:00:00	2024-03-16	22:00:00	no	3
04_March16	MBL_webcam1_2024-03-16T200000	We see the start of the eruption, camera moves to follow fissure propogation. Quite oblique to the fissure and a lot of the fissure is blocked by hills	MBL webcam1	2024-03-16	20:00:00	2024-03-17	09:00:00	yes	14
04_March16	MBL_webcam2_2024-03-16T190000	See the start of the eruption and the start of fissure opening, but then the camera is too zoomed in	MBL webcam2	2024-03-16	19:00:00	2024-03-19	22:00:00	yes	41
04_March16	MBL_webcam2x_2024-03-16T190000	See the start of the eruption, very disatnt view of the valley, can see the fissure propogating through the valley. Far away so hard to tell between lava and new fissure. Camera does not move and is covered in rain a lot	MBL webcam2x	2024-03-16	19:00:00	2024-03-17	10:00:00	yes	16
04_March16	MBL_webcam3_2024-03-16T190000	Cannot see the eruption, this is a distant view from reykjavik, we can see the start when the sky glows, but nothing else, not helpful	MBL webcam3	2024-03-16	19:00:00	2024-03-16	23:00:00	yesish	5
04_March16	MBL_webcam11_2024-03-16T190000	The 8pm video is corrupted so we cant see the start of the eruption. Good view of the fissure, camera does not move	MBL webcam11	2024-03-16	19:00:00	2024-03-17	22:00:00	no	28
05_May29	LFI_reykjanes2_2024-05-29T120000	centered on the eruption initially but view is unclear, the webcam zooms into fire fountain so we cant really see how the fissure is propogating, but good view of fire fountain, camera moves around a lot and zooms in and out which makes view of propogation unclear	LFI reykjanes2	2024-05-29	12:00:00	2024-05-31	10:00:00	yes	47
05_May29	LFI_thorbjorn2_2024-05-29T120000	locked	LFI thorbjorn2	2024-05-29	12:00:00	2024-05-31	13:00:00		50
05_May29	MBL_webcam2_2024-05-29T120000	locked	MBL webcam2	2024-05-29	12:00:00	2024-06-05	00:00:00		138
05_May29	MBL_webcam2x_2024-05-29T170000	locked	MBL webcam2x	2024-05-29	17:00:00	2024-06-05	00:00:00	no	134
05_May29	MBL_webcamA_2024-05-29T120000	locked	MBL webcamA	2024-05-29	12:00:00	2024-06-04	04:00:00		137
06_August22	LFI_langihryggur_2024-08-22T200000	locked	LFI langihryggur	2024-08-22	20:00:00	2024-08-23	00:00:00		5
06_August22	LFI_thorbjorn2_2024-08-22T200000	locked	LFI thorbjorn2	2024-08-22	20:00:00	2024-08-23	23:00:00		27
06_August22	LFI_vogar_2024-08-22T200000	locked	LFI vogar	2024-08-22	20:00:00	2024-09-04	00:00:00		292
06_August22	MBL_webcam1_2024-08-22T210000	locked	MBL webcam1	2024-08-22	21:00:00	2024-08-29	23:00:00		171
06_August22	MBL_webcam11_2024-08-22T210000	locked	MBL webcam11	2024-08-22	21:00:00	2024-08-25	23:00:00		66
06_August22	MBL_webcam13_2024-08-22T200000	locked	MBL webcam13	2024-08-22	20:00:00	2024-08-22	23:00:00		4
									2286

## Sheet: DECEMBER FIRE FOUNTAINS
DECEMBER ERUPTION																																					22:58:21										0
FISSURE PROPAGATION OBSERVATIONS AND CAMERA NOTES									FISSURE PROPAGATION TIMES AND SPEEDS																APPARENT FISSURE LENGTH BASED ON FISSURE ANGLE AND WEBCAM VIEW ANGLE												FIRE FOUNTAIN HEIGHTS FOR FISSURE SEGMENT 1
																																					Fissure 1
Date	Time	Active Fissures	Notes about fissures	Notes about camera	Webcam				Fissure	Opening time	Propogation ends north	Propogation ends south	Propogation ends total	Propogation duration (time)	Propogation duration (seconds)	Fissure length	Propogation speed (m/s)	Propogation speed (m/min)	Start of death	Complete death	Active period				Webcam	Fissure	Webcam Bearing	Fissure Bearing	Real Fissure Length	e	g	Apparent Fissure Length					Time	Time and date	Fissure	Fire fountain height on screen (m)	Fissure length on screen at time (m)	Total fissure length on screen (m)	Real apparent fissure length (m)	Scaling factor	Real fire fountain height (m)	real apparent fissure segment length	Real fissure segment length (m)	Positive uncertainty	Negative uncertainty
2024-12-18	22:17:18	F2	Start of eruption, eruption starts by the cone	quite blurry	webcam 1				F1	2023-12-18 22:26:34			2023-12-18 23:26:25	00:59:51	3591	691.7	0.19262	11.5572	10:31:14 (19/12)	15:35:42 (19/12)	16 hours				webcam 1	1a	46	36	197.9	10	80	34.365	5.75877				22:58:26	2023-12-18 22:58:26	1a	0.001	0.001	0.011	34.365	3124.09	9.37227	3.12409	17.9909	2.86375	3.4365
2024-12-18	22:22:23	F2	new segment of fissure 2 has opened to the north deffinetly by this time, likely earlier	camera angle zooms in and focuses at this point and the new fissure sgement is revealed, the segment therefore likely opened before this	webcam 1				F1a	2023-12-18 22:58:21						197.9									webcam 1	1b	47	39	56.5	8	82	7.86328	7.1853				22:59:02	2023-12-18 22:59:02	1a	0.002	0.002	0.011	34.365	3124.09	12.4964	6.24818	35.9818	2.86375	3.4365
2024-12-18	22:23:00			camera zooms in and focuses, fissures are only visible after this point	webcam 1				F1b	2023-12-18 22:37:10						56.5									webcam 1	1c	47	39	242	8	82	33.6799	7.1853				22:59:36	2023-12-18 22:59:36	1a	0.002	0.002	0.011	34.365	3124.09	9.37227	6.24818	35.9818	2.86375	3.4365
2024-12-18	22:26:04	F2	fissure 2 stops propogating		webcam 1				F1c	2023-12-18 22:26:34						242									webcam 1	2a	48	30	114.1	18	72	35.2588	3.23607				23:00:06	2023-12-18 23:00:06	1a	0.002	0.002	0.011	34.365	3124.09	6.24818	6.24818	35.9818	2.86375	3.4365
2024-12-18	22:26:07	F3	new fissure propogates to the south, this fissure then propogates north and south, so the fissure has likely opened up in the middle of the segment		webcam 1				F2	2023-12-18 22:17:18	22:26:48	22:26:04	2023-12-18 22:26:48	00:09:30	570	769.1	1.3493	80.9579	04:44 (19/12)	01:32 (20/12)	27 hours				webcam 1	2b	50	27	198.9	23	67	77.7164	2.5593				23:03:34	2023-12-18 23:03:34	1a	0.002	0.003	0.011	34.365	3124.09	6.24818	9.37227	53.9727	2.86375	3.4365
2024-12-18	22:26:34	F1	new fissure propogates to the north		webcam 1				F2a	2023-12-18 22:22:23	22:26:48		2023-12-18 22:26:48	00:04:25	265	114.1	0.430566	25.834							webcam 1	3a	50	30	46.9	20	70	16.0407					23:05:02	2023-12-18 23:05:02	1a	0.003	0.003	0.011	34.365	3124.09	9.37227	9.37227	53.9727	2.86375	3.4365
2024-12-18	22:27:32	F3	new fissure segment opens up behind, because it is behind it is hard to see so likely opened before this		webcam 1				F2b	2023-12-18 22:17:18		22:26:07	2023-12-18 22:26:07	00:08:49	529	198.9	0.375992	22.5595							webcam 1	3b	50	31	117.6	19	71	38.2868	54.3276				23:10:06	2023-12-18 23:10:06	1a	0.003	0.005	0.011	34.365	3124.09	9.37227	15.6204	89.9545	2.86375	3.4365
2024-12-18	22:29:09	F3	fissure 3 reaches full southern extent, but end is hidden behind where fissure 4 propogates so it may propogate more after this?		webcam 1				F3	2023-12-18 22:26:07	22:31:49	22:29:09	2023-12-18 22:31:49	00:05:42	342	334.5	0.97807	58.6842	04:00:00	05:04:30	6.5 hours				webcam 1	4a	50	36	13.1	14	76	3.16918					23:15:04	2023-12-18 23:15:04	1a	0.003	0.005	0.011	34.365	3124.09	9.37227	15.6204	89.9545	2.86375	3.4365
2024-12-18	22:31:31	F4	new fissure segment opens to the south, for detailed dynamics of the fissure opening, look at qgis project		webcam 1				F3a	2023-12-18 22:27:32	22:31:49		2023-12-18 22:31:49	00:04:17	257	46.9	0.18249	10.9494							webcam 1	4b	50	28	44.7	22	68	16.7449	19.9141				23:20:07	2023-12-18 23:20:07	1a	0.003	0.006	0.011	34.365	3124.09	9.37227	18.7445	107.945	2.86375	3.4365
2024-12-18	22:31:49	F3	fissure 3 reaches full northern extent		webcam 1				F3b	2023-12-18 22:26:07	22:26:37	22:29:09	2023-12-18 22:29:09	00:03:02	182	117.6	0.646154	38.7692							webcam 1	4c	51	7	76.7	44	46	53.2803					23:25:11	2023-12-18 23:25:11	1a	0.005	0.009	0.011	34.365	3124.09	15.6204	28.1168	161.918	2.86375	3.4365
2024-12-18	22:32:02	F4	new fissure segment opens to the south		webcam 1				F4	22:31:31	22:34:00	22:35:38	22:35:38	00:04:07	247	467.8	1.89393	113.636	06:03 (19/2)	07:25:51 (21/12)	57 hours				webcam 1	5a	53	17	207.2	36	54	121.789					23:30:03	2023-12-18 23:30:03	1a	0.005	0.011	0.011	34.365	3124.09	15.6204	34.365	197.9	2.86375	3.4365
2024-12-18	22:33:23	F4	northern most part of fissure 4 propogates		webcam 1				F4a	2023-12-18 22:33:23	22:34:00		2023-12-18 22:34:00	00:00:37	37	13.1	0.354054	21.2432							webcam 1	5b	54	34	79.1	20	70	27.0538					23:35:07	2023-12-18 23:35:07	1a	0.004	0.011	0.011	34.365	3124.09	12.4964	34.365	197.9	2.86375	3.4365
2024-12-18	22:34:00	F4	northernmost segment stops propogating		webcam 1				F4b	2023-12-18 22:31:31	22:33:06	22:32:14	2023-12-18 22:33:06	00:01:35	95	44.7	0.470526	28.2316							webcam 1	5c	55	27	355.9	28	62	167.085					23:40:11	2023-12-18 23:40:11	1a	0.005	0.011	0.011	34.365	3124.09	15.6204	34.365	197.9	2.86375	3.4365
2024-12-18	22:35:38	F4	southern extent of fissure stops propogating		webcam 1				F4c	2023-12-18 22:32:02	22:32:56	22:35:38	2023-12-18 22:35:38	00:03:36	216	76.7	0.355093	21.3056							webcam 1	6a	58	27	124.3	31	59	64.0192					23:45:06	2023-12-18 23:45:06	1a	0.005	0.011	0.011	34.365	3124.09	15.6204	34.365	197.9	2.86375	3.4365
2024-12-18	22:36:52	F5	new fissure segment opens to the south, propogation of fissure 5 is hard to see because of shadowing from the cone and the camera angle	slightly hidden behind a cone	webcam 1				F5	22:36:52	22:41:50	23:02:01	23:02:01	00:25:09	1509	822.4	0.544997	32.6998	05:53 (19/12)	08:12:21 (19/12)	10 hours				webcam 1	6b	59	18	98.5	41	49	64.6218					23:50:11	2023-12-18 23:50:11	1a	0.004	0.011	0.011	34.365	3124.09	12.4964	34.365	197.9	2.86375	3.4365
2024-12-18	22:37:10	F1	new segment of fissure 1 opens		webcam 1				F5a	2023-12-18 22:36:52	22:41:50	2023-12-18 22:41:50	2023-12-18 22:41:50	00:04:58	298	207.2	0.695302	41.7181							webcam 1	7a	60	11	66.3	49	41	50.0372					23:55:04	2023-12-18 23:55:04	1a	0.002	0.011	0.011	34.365	3124.09	6.24818	34.365	197.9	2.86375	3.4365
2024-12-18	22:38:41	F5	new fissure segment opens, slightly hidden so hard to see		webcam 1				F5b	2023-12-18 22:38:41						79.1									webcam 1	7b	61	5	79.9	56	34	66.2401					00:00:08	2023-12-19 00:00:08	1a	0.002	0.011	0.011	34.365	3124.09	6.24818	34.365	197.9	2.86375	3.4365
2024-12-18	22:41:50	F5	northernmost extent of fissure 5 reached		webcam 1				F5c	2023-12-18 22:56:42		2023-12-18 23:01:50	2023-12-18 23:02:01	00:05:19	319	355.9	1.11567	66.9404							webcam 1	7c	65	5	93.7	60	30	81.1466					00:05:11	2023-12-19 00:05:11	1a	0.004	0.011	0.011	34.365	3124.09	12.4964	34.365	197.9	2.86375	3.4365
2024-12-18	22:56:42	F5	fissure breaks through cone		webcam 1				F6	23:00:36			23:05:27	00:04:51	291	224.3	0.77079	46.2474	05:53 (19/12)	14:51:09 (19/12)	16 hours				webcam 1	7d	68	6	115.1	62	28	101.627					00:10:06	2023-12-19 00:10:06	1a	0.002	0.011	0.011	34.365	3124.09	6.24818	34.365	197.9	2.86375	3.4365
2024-12-18	22:58:21	F1	new fissure segment opens to the north, only slightly disconnected from the end of the fissure very small and takes a long time to grow		webcam 1				F6a	2023-12-18 23:00:36					0	124.3																					00:15:09	2023-12-19 00:15:09	1a	0.002	0.011	0.011	34.365	3124.09	6.24818	34.365	197.9	2.86375	3.4365
2024-12-18	22:58:31	F5	fissure breaks fully through cone		webcam 1				F6b	2023-12-18 23:02:12		23:05:27	2023-12-18 23:05:27	00:03:15	195	98.5	0.505128	30.3077																			00:20:06	2023-12-19 00:20:06	1a	0.002	0.011	0.011	34.365	3124.09	6.24818	34.365	197.9	2.86375	3.4365
2024-12-18	23:00:36	F6	fissure 6 becomes active from the middle of the segemnt, and propogates north and south		webcam 1				F7	23:11:12			1900-01-01 00:26:00	01:14:48	4488	479	0.106729	6.40374	02:58:49	04:47:56	5.5 hours				Webcam	Fissure	Webcam Bearing	Fissure Bearing	Real Fissure Length	e	g	Apparent Fissure Length					00:25:11	2023-12-19 00:25:11	1a	0.004	0.011	0.011	34.365	3124.09	12.4964	34.365	197.9	2.86375	3.4365
2024-12-18	23:01:00	F5 and F6	this fissure segment opens in decrete pockets as described on the Qgis project, these discrete segements then eventually link up		webcam 1				F7a	2023-12-18 23:07:29			2023-12-18 23:10:00	00:02:31	151	66.3	0.439073	26.3444							North of box												00:30:08	2023-12-19 00:30:08	1a	0.003	0.011	0.011	34.365	3124.09	9.37227	34.365	197.9	2.86375	3.4365
2024-12-18	23:02:12	F6	new fissure segment opens to the south		webcam 1				F7b	2023-12-18 23:11:12			2023-12-18 23:50:00	00:38:48	2328	79.9	0.0343213	2.05928							webcam 1	1a	47.2	36	197.9	11.2	78.8	38.439					00:35:06	2023-12-19 00:35:06	1a	0.003	0.011	0.011	34.365	3124.09	9.37227	34.365	197.9	2.86375	3.4365
2024-12-18	23:05:27	F6	fissure propogated at 02 has now stopped growing , fire fountains on this fissure are significantly lower than other fissures		webcam 1				F7c	2023-12-18 23:55:31						93.7									webcam 1	1b	47.7	39	56.5	8.7	81.3	8.54624					00:40:07	2023-12-19 00:40:07	1a	0.003	0.011	0.011	34.365	3124.09	9.37227	34.365	197.9	2.86375	3.4365
2024-12-18	23:11:12	f7? But likely the part that’s a continuation of the f6 fissure	fissure starts to open behind the old sundukur row	hidden behind crater row	webcam 1				F7d	2023-12-18 23:59:49			2023-12-19 00:12:04	00:12:15	735	115.1	0.156599	9.39592							webcam 1	1c	48	39	242	9	81	37.8571					00:45:10	2023-12-19 00:45:10	1a	0.002	0.011	0.011	34.365	3124.09	6.24818	34.365	197.9	2.86375	3.4365
2024-12-18	23:15:06	F7	fire fountains visible from behind the crater row	hidden behind crater row	webcam 1											6117.2									webcam 1	2a	48.9	30	114.1	18.9	71.1	36.959					00:50:05	2023-12-19 00:50:05	1a	0.003	0.011	0.011	34.365	3124.09	9.37227	34.365	197.9	2.86375	3.4365
2024-12-18	23:26:25	F1	fissure 1 stops propogating		webcam 1																				webcam 1	2b	51	27	198.9	24	66	80.8999					00:55:10	2023-12-19 00:55:10	1a	0.003	0.011	0.011	34.365	3124.09	9.37227	34.365	197.9	2.86375	3.4365
																									webcam 1	3a	51.5	30	46.9	21.5	68.5	17.1889					22:37:10									0	0
2024-12-18	23:50:00	F7	fissure behind crater row appears to have reached full extent	hidden behind crater row	webcam 1																				webcam 1	3b	51.7	31	117.6	20.7	69.3	41.5686	58.7575				22:37:40	2023-12-18 22:37:40	1b	0.003	0.002	0.003	7.86328	2621.09	7.86328	5.24219	30.1886	1.96582	3.93164
2024-12-18	23:55:31	F7	large jump tp new fissure segment	no longer hidden behind crater row	webcam 1																				webcam 1	4a	51.5	36	13.1	15.5	74.5	3.50082					22:37:48	2023-12-18 22:37:48	1b	0.004	0.002	0.003	7.86328	2621.09	10.4844	5.24219	30.1886	1.96582	3.93164
2024-12-18	23:59:49	F7	southern most fissure segment becomes actove	quite misty so hard to see	webcam 1																				webcam 1	4b	52.1	28	44.7	24.1	65.9	18.2524					22:37:55	2023-12-18 22:37:55	1b	0.003	0.002	0.003	7.86328	2621.09	7.86328	5.24219	30.1886	1.96582	3.93164
2024-12-19	00:12:04	F7	southern most extent of fissure 7 is reached, but it has jumped a bit to get here so still a few gaps which need to be opened, fissure 7 is really weak, especially this new segment	quite misty so hard to see	webcam 1																				webcam 1	4c	52.6	7	76.7	45.6	44.4	54.8001					22:38:30	2023-12-18 22:38:30	1b	0.004	0.002	0.003	7.86328	2621.09	10.4844	5.24219	30.1886	1.96582	3.93164
2024-12-19	00:26:00	F7	fissure segment appears to be completely joined up now, likely it was joined up before this but it is hard to see because the fissure is really weak	occassinally misty up to this point so hard to see accurate time when fissure joins up	webcam 1																				webcam 1	5a	54.5	17	207.2	37.5	52.5	126.135					22:39:02	2023-12-18 22:39:02	1b	0.004	0.002	0.003	7.86328	2621.09	10.4844	5.24219	30.1886	1.96582	3.93164
2024-12-19	from 00:26		all fissures have reached their full extent now, we have moved from fissure growth into fissure death		webcam 1																				webcam 1	5b	56.3	34	79.1	22.3	67.7	30.015					22:39:35	2023-12-18 22:39:35	1b	0.005	0.003	0.003	7.86328	2621.09	13.1055	7.86328	45.2828	1.96582	3.93164
2024-12-19	from 00:40			weather gets bad and so visibility is poor weather then recovers	webcam 1																				webcam 1	5c	56.8	27	355.9	29.8	60.2	176.873					22:41:57	2023-12-18 22:41:57	1b	0.006	0.003	0.003	7.86328	2621.09	15.7266	7.86328	45.2828	1.96582	3.93164
2024-12-19	from 00:57			weather gets really bad again and visibility is near nonexistant	webcam 1																				webcam 1	6a	61	27	124.3	34	56	69.5077					22:45:04	2023-12-18 22:45:04	1b	0.008	0.003	0.003	7.86328	2621.09	20.9687	7.86328	45.2828	1.96582	3.93164
2024-12-19	01:03:00		when visability breifly recoversfissure 1 appears to be inactive, but could be a product of low visibility, the northern section of fissure 5 is dying as is the northern half of fissure 6, fisre fountains are considerably lower, largest fire fountains come from fissure 4	visibility still poor but momentarrily better	webcam 1																				webcam 1	6b	62.2	18	98.5	44.2	45.8	68.6708					22:47:38	2023-12-18 22:47:38	1b	0.009	0.003	0.003	7.86328	2621.09	23.5898	7.86328	45.2828	1.96582	3.93164
2024-12-19	from 1:40		fissures 5 6 and 7 are significantly weaker, epxecially in these fissures the activity appears to be more concebntrated in individual vents in a line rather than a complete curtain of fire. Fissures 3 and 4 still seem to be the most active	visibility recovers	webcam 1																				webcam 1	7a	63.5	11	66.3	52.5	37.5	52.5993					22:50:04	2023-12-18 22:50:04	1b	0.009	0.003	0.003	7.86328	2621.09	23.5898	7.86328	45.2828	1.96582	3.93164
2024-12-19	02:00-03:00		southern most end of fissure 7 is dying and shortening, activity in fissures 5, 6 and is getting more intermittent and concentrated into discrete vents, fissures 1-4 still have near continuous activity		webcam 1																				webcam 1	7b	65	5	79.9	60	30	69.1954					22:55:05	2023-12-18 22:55:05	1b	0.007	0.003	0.003	7.86328	2621.09	18.3477	7.86328	45.2828	1.96582	3.93164
2024-12-19	02:58:49	F7	end of fissure 7 is dead, fissure 7 is the most disjointed and concentrated into individual vents		webcam 1																				webcam 1	7c	68.9	5	93.7	63.9	26.1	84.1452					23:00:06	2023-12-18 23:00:06	1b	0.01	0.003	0.003	7.86328	2621.09	26.2109	7.86328	45.2828	1.96582	3.93164
																									webcam 1	7d	71.9	6	115.1	65.9	24.1	105.067					23:05:02	2023-12-18 23:05:02	1b	0.01	0.003	0.003	7.86328	2621.09	26.2109	7.86328	45.2828	1.96582	3.93164
2024-12-19	03:16:13	F2	southern end of fissure 2 seems to be dead this is the location where the eruption started, may still be slightly alive, but hidden behind a cone, actually it is not dead, it reignites shortly, but activity is very intermittent		webcam 1																																23:10:06	2023-12-18 23:10:06	1b	0.01	0.003	0.003	7.86328	2621.09	26.2109	7.86328	45.2828	1.96582	3.93164
2024-12-19	03:23:00			Camera angle moves! :(	webcam 1																				Webcam	Fissure	Webcam Bearing	Fissure Bearing	Real Fissure Length	e	g	Apparent Fissure Length					23:15:04	2023-12-18 23:15:04	1b	0.009	0.003	0.003	7.86328	2621.09	23.5898	7.86328	45.2828	1.96582	3.93164
2024-12-19	04:00:00	F3	Fissure 3 is shortening significantly from both ends		webcam 1																				south of box												23:20:07	2023-12-18 23:20:07	1b	0.007	0.003	0.003	7.86328	2621.09	18.3477	7.86328	45.2828	1.96582	3.93164
2024-12-19	04:44:00	F2	northern end of fissure 2 is dead		webcam 1																				webcam 1	1a	45.1	36	197.9	9.1	80.9	31.2995					23:25:11	2023-12-18 23:25:11	1b	0.007	0.003	0.003	7.86328	2621.09	18.3477	7.86328	45.2828	1.96582	3.93164
2024-12-19	04:47:56	F7	F7 now seems to be dead, Gro put the time of death at 03:38, but I disagree with this, the remaining light could be residual from lava flows, but it is in the exact same positions every time and seems to flare up then dies out, from this time there is no more light		webcam 1																				webcam 1	1b	45.5	39	56.5	6.5	83.5	6.39598					23:30:03	2023-12-18 23:30:03	1b	0.01	0.003	0.003	7.86328	2621.09	26.2109	7.86328	45.2828	1.96582	3.93164
2024-12-19	04:59:00	F3	southern end of fissure 3 is dead		webcam 1																				webcam 1	1c	45.7	39	242	6.7	83.3	28.2343					23:35:07	2023-12-18 23:35:07	1b	0.007	0.003	0.003	7.86328	2621.09	18.3477	7.86328	45.2828	1.96582	3.93164
2024-12-19	05:04:30	F3	northern end of fissure is dead, fissure 3 is now completely dead		webcam 1																				webcam 1	2a	46.5	30	114.1	16.5	73.5	32.4062					23:40:11	2023-12-18 23:40:11	1b	0.006	0.003	0.003	7.86328	2621.09	15.7266	7.86328	45.2828	1.96582	3.93164
2024-12-19	05:50:00			bad weather completely clouds view	webcam 1																				webcam 1	2b	48.4	27	198.9	21.4	68.6	72.574					23:45:06	2023-12-18 23:45:06	1b	0.007	0.003	0.003	7.86328	2621.09	18.3477	7.86328	45.2828	1.96582	3.93164
2024-12-19	05:53:29	F5	when weather recovers, southern end of fissure 5 up to the cone is dead, this includes the section that runs into fissure 6 territory	bad weather obstructs more accurate time constraint	webcam 1																				webcam 1	3a	48.3	30	46.9	18.3	71.7	14.7262	50.0892				23:50:11	2023-12-18 23:50:11	1b	0.007	0.003	0.003	7.86328	2621.09	18.3477	7.86328	45.2828	1.96582	3.93164
2024-12-19	06:03:00	F4	middle of F4 is dead		webcam 1																				webcam 1	3b	48.5	31	117.6	17.5	72.5	35.363					23:55:04	2023-12-18 23:55:04	1b	0.006	0.003	0.003	7.86328	2621.09	15.7266	7.86328	45.2828	1.96582	3.93164
2024-12-19	06:50:00			bad weather obstructs view	webcam 1																				webcam 1	4a	48.2	36	13.1	12.2	77.8	2.76835					00:00:08	2023-12-19 00:00:08	1b	0.004	0.003	0.003	7.86328	2621.09	10.4844	7.86328	45.2828	1.96582	3.93164
2024-12-19	06:55:52	F4	when weather recovers, nothern end of fissure 4 is dead	bad weather obstructs more accurate time constraint	webcam 1																				webcam 1	4b	48.6	28	44.7	20.6	69.4	15.7273					00:05:11	2023-12-19 00:05:11	1b	0.006	0.003	0.003	7.86328	2621.09	15.7266	7.86328	45.2828	1.96582	3.93164
2024-12-19	07:00:00	F6	through 07, fissure 6 becomes really segmented, each of the fissure segments is shortening from their ends into the middle of each segment		webcam 1																				webcam 1	4c	49	7	76.7	42	48	51.3223					00:10:06	2023-12-19 00:10:06	1b	0.005	0.003	0.003	7.86328	2621.09	13.1055	7.86328	45.2828	1.96582	3.93164
2024-12-19	07:27:00	F5	middle sections of fissure 5 appear to be dead, but obscured by cone		webcam 1																				webcam 1	5a	50.4	17	207.2	33.4	56.6	114.06					00:15:09	2023-12-19 00:15:09	1b	0.004	0.003	0.003	7.86328	2621.09	10.4844	7.86328	45.2828	1.96582	3.93164
2024-12-19	07:42:44	F6	southern end of fissure 6 is dead. There are some other bursts of activity in the area after this time, but they don’t appear to come from the fissure, its likely gas breaking through the lava flows		webcam 1					Time	Time and date	Fissure	Fire fountain height on screen (m)	Fissure length on screen at time (m)	Total fissure length on screen (m)	Real apparent fissure length (m)	Scaling factor	Real fire fountain height (m)							webcam 1	5b	52	34	79.1	18	72	24.4432					00:20:06	2023-12-19 00:20:06	1b	0.003	0.003	0.003	7.86328	2621.09	7.86328	7.86328	45.2828	1.96582	3.93164
2024-12-19	08:00:00	F2	fissure 2 appeared to be dead before this but it is now very active		webcam 1					23:25:11	2023-12-18 23:25:11	1a	0.005	0.009	0.011	38.439	3494.45	17.4723							webcam 1	5c	52.3	27	355.9	25.3	64.7	152.097					00:25:11	2023-12-19 00:25:11	1b	0.005	0.003	0.003	7.86328	2621.09	13.1055	7.86328	45.2828	1.96582	3.93164
2024-12-19	08:12:21	F5	fissure segment through the cone is now dead, the fissure shortened from each side to meet in the middle and then died, this may be the death of fissure 5, the only section that remains is the bit that’s technically in the fissure 4 territory		webcam 1					23:25:11	2023-12-18 23:25:11	1a	0.005	0.009	0.011	31.2995	2845.41	14.227							webcam 1	6a	54.8	27	124.3	27.8	62.2	57.9719					00:30:08	2023-12-19 00:30:08	1b	0.005	0.003	0.003	7.86328	2621.09	13.1055	7.86328	45.2828	1.96582	3.93164
2024-12-19	08:47:47	F6	northern part of fissure 6 appears to be dead		webcam 1																				webcam 1	6b	55.8	18	98.5	37.8	52.2	60.3713					00:35:06	2023-12-19 00:35:06	1b	0.004	0.003	0.003	7.86328	2621.09	10.4844	7.86328	45.2828	1.96582	3.93164
2024-12-19	09:00:00			poor weather obstructs view	webcam 1																				webcam 1	7a	57	11	66.3	46	44	47.6922					00:40:07	2023-12-19 00:40:07	1b	0.005	0.003	0.003	7.86328	2621.09	13.1055	7.86328	45.2828	1.96582	3.93164
2024-12-19	09:00:00	F1	fissure becomes more segmented, each individual fissure shortens from their ends		webcam 1					22:37:40	2023-12-18 22:37:40	1b	0.003	0.002	0.003	8.54624	2848.75	8.54624	6.39598	2.15025					webcam 1	7b	58.2	5	79.9	53.2	36.8	63.9784					00:45:10	2023-12-19 00:45:10	1b	0.005	0.003	0.003	7.86328	2621.09	13.1055	7.86328	45.2828	1.96582	3.93164
2024-12-19	09:28:00			camera moves to zoom in	webcam 1					22:37:48	2023-12-18 22:37:48	1b	0.004	0.002	0.003	8.54624	2848.75	11.395	8.52798	2.86701					webcam 1	7c	61.3	5	93.7	56.3	33.7	77.9541					00:50:05	2023-12-19 00:50:05	1b	0.003	0.003	0.003	7.86328	2621.09	7.86328	7.86328	45.2828	1.96582	3.93164
2024-12-19	10:31:14	F1	southern end is dead		webcam 1					22:37:55	2023-12-18 22:37:55	1b	0.003	0.002	0.003	8.54624	2848.75	8.54624	6.39598	2.15025					webcam 1	7d	64	6	115.1	58	32	97.6103					00:55:10	2023-12-19 00:55:10	1b	0.004	0.003	0.003	7.86328	2621.09	10.4844	7.86328	45.2828	1.96582	3.93164
										22:38:30	2023-12-18 22:38:30	1b	0.004	0.002	0.003	8.54624	2848.75	11.395	8.52798	2.86701																	22:26:34										0
2024-12-19	11:34:15	F1	middle segment is dead		webcam 1					22:39:02	2023-12-18 22:39:02	1b	0.004	0.002	0.003	8.54624	2848.75	11.395	8.52798	2.86701																	22:26:40	2023-12-18 22:26:40	1c	0.004	0.002	0.007	33.6799	4811.41	19.2457	9.62283	55.4156	4.20999	5.61332
2024-12-19	11:44:04	F1	southern tip of northern fissure is dead		webcam 1					22:39:35	2023-12-18 22:39:35	1b	0.005	0.003	0.003	8.54624	2848.75	14.2437	10.66	3.58376																	22:26:45	2023-12-18 22:26:45	1c	0.004	0.003	0.007	33.6799	4811.41	19.2457	14.4342	83.1235	4.20999	5.61332
2024-12-19	12:10:14	F4	southernmost tip dies		webcam 1					22:41:57	2023-12-18 22:41:57	1b	0.006	0.003	0.003	8.54624	2848.75	17.0925	12.792	4.30051																	22:26:52	2023-12-18 22:26:52	1c	0.005	0.005	0.007	33.6799	4811.41	24.0571	24.0571	138.539	4.20999	5.61332
2024-12-19	13:15:22	F2	southern end of fissure 2 closes		webcam 1					22:45:04	2023-12-18 22:45:04	1b	0.008	0.003	0.003	8.54624	2848.75	22.79	17.056	5.73401					length differences		1a	7.1395									22:27:00	2023-12-18 22:27:00	1c	0.006	0.006	0.007	33.6799	4811.41	28.8685	28.8685	166.247	4.20999	5.61332
2024-12-19	14:20:00			bad weather massively obscures view	webcam 1					22:47:38	2023-12-18 22:47:38	1b	0.009	0.003	0.003	8.54624	2848.75	25.6387	19.1879	6.45076							1b	2.15025									22:27:12	2023-12-18 22:27:12	1c	0.006	0.007	0.007	33.6799	4811.41	28.8685	33.6799	193.955	4.20999	5.61332
2024-12-19	14:51:09	F6	last segment dies		webcam 1					22:50:04	2023-12-18 22:50:04	1b	0.009	0.003	0.003	8.54624	2848.75	25.6387	19.1879	6.45076							1c	9.62282									22:27:20	2023-12-18 22:27:20	1c	0.005	0.007	0.007	33.6799	4811.41	24.0571	33.6799	193.955	4.20999	5.61332
2024-12-19	15:35:42	F1	last part of fissure 1 dies		webcam 1					22:55:05	2023-12-18 22:55:05	1b	0.007	0.003	0.003	8.54624	2848.75	19.9412	14.924	5.01726							2a	4.55283									22:27:28	2023-12-18 22:27:28	1c	0.007	0.007	0.007	33.6799	4811.41	33.6799	33.6799	193.955	4.20999	5.61332
2024-12-19	18:09:13	F4	northern fissure segment dies		webcam 1					23:00:06	2023-12-18 23:00:06	1b	0.01	0.003	0.003	8.54624	2848.75	28.4875	21.3199	7.16752							2b	8.32593									22:27:39	2023-12-18 22:27:39	1c	0.007	0.007	0.007	33.6799	4811.41	33.6799	33.6799	193.955	4.20999	5.61332
2024-12-20	00:52:00			bad weather massively obscures view this continues for a few hours, with only glimpses that show the 2 fissures are still active	webcam 1					23:05:02	2023-12-18 23:05:02	1b	0.01	0.003	0.003	8.54624	2848.75	28.4875	21.3199	7.16752							3a	2.46266									22:27:56	2023-12-18 22:27:56	1c	0.007	0.007	0.007	33.6799	4811.41	33.6799	33.6799	193.955	4.20999	5.61332
	01:32:00	F2	glowing gases from F2 stop being visible from now, but the weather is dreadful so hard to tell if its still erupting, I must assume fissure 2 is now dead	really bad weather and fissure 1 is hidden behind a hill	Langihryggur					23:10:06	2023-12-18 23:10:06	1b	0.01	0.003	0.003	8.54624	2848.75	28.4875	21.3199	7.16752							3b	6.20564									22:28:31	2023-12-18 22:28:31	1c	0.006	0.007	0.007	33.6799	4811.41	28.8685	33.6799	193.955	4.20999	5.61332
2024-12-21	07:25:51…	F4	glow from F4 stops pulsating, I assume the pulsations are small fountains that suggest the fissure is still active, when the glow stops pulsating, the glow likely now just comes from hot magma sat there, the eruption has stopped	really poor visibility	webcam 1					23:15:04	2023-12-18 23:15:04	1b	0.009	0.003	0.003	8.54624	2848.75	25.6387	19.1879	6.45076							4a	0.732468									22:29:01	2023-12-18 22:29:01	1c	0.009	0.007	0.007	33.6799	4811.41	43.3027	33.6799	193.955	4.20999	5.61332
										23:20:07	2023-12-18 23:20:07	1b	0.007	0.003	0.003	8.54624	2848.75	19.9412	14.924	5.01726							4b	2.52505									22:29:53	2023-12-18 22:29:53	1c	0.007	0.007	0.007	33.6799	4811.41	33.6799	33.6799	193.955	4.20999	5.61332
										23:25:11	2023-12-18 23:25:11	1b	0.007	0.003	0.003	8.54624	2848.75	19.9412	14.924	5.01726							4c	3.47774									22:30:57	2023-12-18 22:30:57	1c	0.008	0.007	0.007	33.6799	4811.41	38.4913	33.6799	193.955	4.20999	5.61332
										23:30:03	2023-12-18 23:30:03	1b	0.01	0.003	0.003	8.54624	2848.75	28.4875	21.3199	7.16752							5a	12.0758									22:31:29	2023-12-18 22:31:29	1c	0.009	0.007	0.007	33.6799	4811.41	43.3027	33.6799	193.955	4.20999	5.61332
										23:35:07	2023-12-18 23:35:07	1b	0.007	0.003	0.003	8.54624	2848.75	19.9412	14.924	5.01726							5b	5.57174									22:32:01	2023-12-18 22:32:01	1c	0.012	0.007	0.007	33.6799	4811.41	57.737	33.6799	193.955	4.20999	5.61332
										23:40:11	2023-12-18 23:40:11	1b	0.006	0.003	0.003	8.54624	2848.75	17.0925	12.792	4.30051							5c	24.7764									22:32:34	2023-12-18 22:32:34	1c	0.01	0.007	0.007	33.6799	4811.41	48.1141	33.6799	193.955	4.20999	5.61332
										23:45:06	2023-12-18 23:45:06	1b	0.007	0.003	0.003	8.54624	2848.75	19.9412	14.924	5.01726							6a	11.5358									22:33:07	2023-12-18 22:33:07	1c	0.01	0.007	0.007	33.6799	4811.41	48.1141	33.6799	193.955	4.20999	5.61332
										23:50:11	2023-12-18 23:50:11	1b	0.007	0.003	0.003	8.54624	2848.75	19.9412	14.924	5.01726							6b	8.29942									22:33:29	2023-12-18 22:33:29	1c	0.01	0.007	0.007	33.6799	4811.41	48.1141	33.6799	193.955	4.20999	5.61332
																											7a	4.9071									22:34:11	2023-12-18 22:34:11	1c	0.011	0.007	0.007	33.6799	4811.41	52.9255	33.6799	193.955	4.20999	5.61332
																											7b	5.21699									22:35:13	2023-12-18 22:35:13	1c	0.014	0.007	0.007	33.6799	4811.41	67.3598	33.6799	193.955	4.20999	5.61332
																											7c	6.19108									22:36:21	2023-12-18 22:36:21	1c	0.012	0.007	0.007	33.6799	4811.41	57.737	33.6799	193.955	4.20999	5.61332
																											7d	7.45688									22:37:16	2023-12-18 22:37:16	1c	0.012	0.007	0.007	33.6799	4811.41	57.737	33.6799	193.955	4.20999	5.61332
										22:37:40	2023-12-18 22:37:40	1b	0.003	0.002	0.003	6.39598	2131.99	6.39598																			22:38:30	2023-12-18 22:38:30	1c	0.013	0.007	0.007	33.6799	4811.41	62.5484	33.6799	193.955	4.20999	5.61332
										22:37:48	2023-12-18 22:37:48	1b	0.004	0.002	0.003	6.39598	2131.99	8.52798																			22:39:35	2023-12-18 22:39:35	1c	0.012	0.007	0.007	33.6799	4811.41	57.737	33.6799	193.955	4.20999	5.61332
										22:37:55	2023-12-18 22:37:55	1b	0.003	0.002	0.003	6.39598	2131.99	6.39598																			22:41:57	2023-12-18 22:41:57	1c	0.01	0.007	0.007	33.6799	4811.41	48.1141	33.6799	193.955	4.20999	5.61332
										22:38:30	2023-12-18 22:38:30	1b	0.004	0.002	0.003	6.39598	2131.99	8.52798																			22:45:04	2023-12-18 22:45:04	1c	0.009	0.007	0.007	33.6799	4811.41	43.3027	33.6799	193.955	4.20999	5.61332
										22:39:02	2023-12-18 22:39:02	1b	0.004	0.002	0.003	6.39598	2131.99	8.52798																			22:47:38	2023-12-18 22:47:38	1c	0.011	0.007	0.007	33.6799	4811.41	52.9255	33.6799	193.955	4.20999	5.61332
										22:39:35	2023-12-18 22:39:35	1b	0.005	0.003	0.003	6.39598	2131.99	10.66																			22:50:04	2023-12-18 22:50:04	1c	0.01	0.007	0.007	33.6799	4811.41	48.1141	33.6799	193.955	4.20999	5.61332
										22:41:57	2023-12-18 22:41:57	1b	0.006	0.003	0.003	6.39598	2131.99	12.792																			22:55:05	2023-12-18 22:55:05	1c	0.012	0.007	0.007	33.6799	4811.41	57.737	33.6799	193.955	4.20999	5.61332
										22:45:04	2023-12-18 22:45:04	1b	0.008	0.003	0.003	6.39598	2131.99	17.056																			23:00:06	2023-12-18 23:00:06	1c	0.01	0.007	0.007	33.6799	4811.41	48.1141	33.6799	193.955	4.20999	5.61332
										22:47:38	2023-12-18 22:47:38	1b	0.009	0.003	0.003	6.39598	2131.99	19.1879																			23:05:02	2023-12-18 23:05:02	1c	0.009	0.007	0.007	33.6799	4811.41	43.3027	33.6799	193.955	4.20999	5.61332
										22:50:04	2023-12-18 22:50:04	1b	0.009	0.003	0.003	6.39598	2131.99	19.1879																			23:10:06	2023-12-18 23:10:06	1c	0.007	0.007	0.007	33.6799	4811.41	33.6799	33.6799	193.955	4.20999	5.61332
										22:55:05	2023-12-18 22:55:05	1b	0.007	0.003	0.003	6.39598	2131.99	14.924																			23:15:04	2023-12-18 23:15:04	1c	0.007	0.007	0.007	33.6799	4811.41	33.6799	33.6799	193.955	4.20999	5.61332
										23:00:06	2023-12-18 23:00:06	1b	0.01	0.003	0.003	6.39598	2131.99	21.3199																			23:20:07	2023-12-18 23:20:07	1c	0.007	0.007	0.007	33.6799	4811.41	33.6799	33.6799	193.955	4.20999	5.61332
										23:05:02	2023-12-18 23:05:02	1b	0.01	0.003	0.003	6.39598	2131.99	21.3199																			23:25:11	2023-12-18 23:25:11	1c	0.007	0.007	0.007	33.6799	4811.41	33.6799	33.6799	193.955	4.20999	5.61332
										23:10:06	2023-12-18 23:10:06	1b	0.01	0.003	0.003	6.39598	2131.99	21.3199																			23:30:03	2023-12-18 23:30:03	1c	0.006	0.007	0.007	33.6799	4811.41	28.8685	33.6799	193.955	4.20999	5.61332
										23:15:04	2023-12-18 23:15:04	1b	0.009	0.003	0.003	6.39598	2131.99	19.1879																			23:35:07	2023-12-18 23:35:07	1c	0.006	0.007	0.007	33.6799	4811.41	28.8685	33.6799	193.955	4.20999	5.61332
										23:20:07	2023-12-18 23:20:07	1b	0.007	0.003	0.003	6.39598	2131.99	14.924																			23:40:11	2023-12-18 23:40:11	1c	0.005	0.007	0.007	33.6799	4811.41	24.0571	33.6799	193.955	4.20999	5.61332
										23:25:11	2023-12-18 23:25:11	1b	0.007	0.003	0.003	6.39598	2131.99	14.924																			23:45:06	2023-12-18 23:45:06	1c	0.006	0.007	0.007	33.6799	4811.41	28.8685	33.6799	193.955	4.20999	5.61332
										23:30:03	2023-12-18 23:30:03	1b	0.01	0.003	0.003	6.39598	2131.99	21.3199																			23:50:11	2023-12-18 23:50:11	1c	0.008	0.007	0.007	33.6799	4811.41	38.4913	33.6799	193.955	4.20999	5.61332
										23:35:07	2023-12-18 23:35:07	1b	0.007	0.003	0.003	6.39598	2131.99	14.924																			23:55:04	2023-12-18 23:55:04	1c	0.004	0.007	0.007	33.6799	4811.41	19.2457	33.6799	193.955	4.20999	5.61332
										23:40:11	2023-12-18 23:40:11	1b	0.006	0.003	0.003	6.39598	2131.99	12.792																			00:00:08	2023-12-19 00:00:08	1c	0.004	0.007	0.007	33.6799	4811.41	19.2457	33.6799	193.955	4.20999	5.61332
										23:45:06	2023-12-18 23:45:06	1b	0.007	0.003	0.003	6.39598	2131.99	14.924																			00:05:11	2023-12-19 00:05:11	1c	0.006	0.007	0.007	33.6799	4811.41	28.8685	33.6799	193.955	4.20999	5.61332
										23:50:11	2023-12-18 23:50:11	1b	0.007	0.003	0.003	6.39598	2131.99	14.924																			00:10:06	2023-12-19 00:10:06	1c	0.005	0.007	0.007	33.6799	4811.41	24.0571	33.6799	193.955	4.20999	5.61332
																																					00:15:09	2023-12-19 00:15:09	1c	0.004	0.007	0.007	33.6799	4811.41	19.2457	33.6799	193.955	4.20999	5.61332
																																					00:20:06	2023-12-19 00:20:06	1c	0.004	0.007	0.007	33.6799	4811.41	19.2457	33.6799	193.955	4.20999	5.61332
																																					00:25:11	2023-12-19 00:25:11	1c	0.007	0.007	0.007	33.6799	4811.41	33.6799	33.6799	193.955	4.20999	5.61332
																																					00:30:08	2023-12-19 00:30:08	1c	0.005	0.007	0.007	33.6799	4811.41	24.0571	33.6799	193.955	4.20999	5.61332
																																					00:35:06	2023-12-19 00:35:06	1c	0.006	0.007	0.007	33.6799	4811.41	28.8685	33.6799	193.955	4.20999	5.61332
																																					00:40:07	2023-12-19 00:40:07	1c	0.005	0.007	0.007	33.6799	4811.41	24.0571	33.6799	193.955	4.20999	5.61332
																																					00:45:10	2023-12-19 00:45:10	1c	0.003	0.007	0.007	33.6799	4811.41	14.4342	33.6799	193.955	4.20999	5.61332
																																					00:50:05	2023-12-19 00:50:05	1c	0.004	0.007	0.007	33.6799	4811.41	19.2457	33.6799	193.955	4.20999	5.61332
																																					00:55:10	2023-12-19 00:55:10	1c	0.005	0.007	0.007	33.6799	4811.41	24.0571	33.6799	193.955	4.20999	5.61332
																																												mean	23.6727
																																												max	67.3598
																																												min	6.24818
[truncated: 77 more columns]

## Sheet: JANUARY FIRE FOUNTAINS
JANUARY ERUPTION
FISSURE PROPAGATION OBSERVATIONS AND CAMERA NOTES								FISSURE PROPAGATION TIMES AND SPEEDS																APPARENT FISSURE LENGTH BASED ON FISSURE ANGLE AND WEBCAM VIEW ANGLE											FIRE FOUNTAIN HEIGHTS FOR FISSURE SEGMENT 1
Date	Time	Active Fissures	Notes about fissures	Notes about camera	Webcam			Fissure	Opening time	Propogation ends (north)	Propogation ends (south)	Propogation ends	Propogation duration	Propogation duration (s)	Fissure length	Propogation speed (m/s)	Propogation speed (m/min)	Start of death	Complete death	Active period				fissure	webcam	webcam bearing	fissure bearing	real fissure length	e	g	apparent fissure length				Time	TimeAndDate	Fissure	Fire foutain height on screen (m)	Fissure length on screen at that time (m)	Total fissure length on screen (m)	Real fissure length (m)	Real apparent fissure length (m)	Scaling factor	Real fire fountain height (m)	Real apparent fissure segment length (m)	Real fissure segment length (m)	Positive uncertainty	Negative uncertainty	Upper bound
2024-01-14	07:57:06	F1	start of eruption	quite poor quality in the dark	webcam 1		Fissure 1	F1a	08:51:24			09:01:20	00:09:56	596	184.7	0.309899	18.594	03:00 cones	2024-01-15 14:13:38					1a	webcam 1	97	18	184.7	79	11	181.307				08:03:26	2024-01-14 08:03:26	1b	0.007	0.05	0.056	131.4	165.668	2958.35	20.7085	147.918	167.527	2.90645	3.01214	23.6149
2024-01-14	08:03:33	F1b	maximum southern extent reached when the camera focuses, likely reached before this but too difficult to tell	camera focuses	webcam 1			F1b	07:57:06			08:03:33	00:06:27	387	131.4	0.339535	20.3721	03:00 cones	22:46:28 (15/1) strombolian activity stops, still glowing for hours after this					1b(a)	webcam 1	101	39	44.9	62	28	39.6443				08:03:40	2024-01-14 08:03:40	1b	0.013	0.05	0.056	131.4	165.668	2958.35	38.4586	147.918	167.527	2.90645	3.01214	41.3651
2024-01-14	08:06:30	F1c	fissure 1c opens, propogates to the south very quickly, but doesn’t move to the north yet		webcam 1			F1b(a)	08:11:50	08:14:15	08:21:42	08:21:48	00:09:58	598	44.9	0.0750836	4.50502		20:06:40 (14/1)					1b	webcam 1	104	34	131.4	70	20	123.476				08:03:50	2024-01-14 08:03:50	1b	0.014	0.05	0.056	131.4	165.668	2958.35	41.417	147.918	167.527	2.90645	3.01214	44.3234
2024-01-14	08:11:16	F1c	fissure reaches northernmost extent		webcam 1			F1c	08:06:30	08:11:16	08:14:30	08:14:30	00:08:00	480	197.2	0.410833	24.65		03:43 (15/1)					1c	webcam 1	109	34	197.2	75	15	190.481				08:05:23	2024-01-14 08:05:23	1b	0.012	0.055	0.056	131.4	165.668	2958.35	35.5002	162.709	184.28	2.90645	3.01214	38.4067
2024-01-14	08:11:50	F1b	maximum northern extent reached		webcam 1			F1d	08:13:23	08:15:03	08:14:15	08:15:03	00:01:40	100	57	0.57	34.2		01:57 (15/1)					1d	webcam 1	114	61	57	53	37	45.5222				08:07:57	2024-01-14 08:07:57	1b	0.014	0.056	0.056	131.4	165.668	2958.35	41.417	165.668	187.63	2.90645	3.01214	44.3234
2024-01-14	08:13:23	F1d	fissure propogates, no fire fountains visible at this point		webcam 1			F1e	08:16:00		08:18:16	08:18:16	00:02:16	136	61	0.448529	26.9118		01:57 (15/1)					1e	webcam 1	116	27	61	89	1	60.9907				08:08:03	2024-01-14 08:08:03	1b	0.018	0.056	0.056	131.4	165.668	2958.35	53.2504	165.668	187.63	2.90645	3.01214	56.1568
2024-01-14	08:13:50	F1d	fissure appears to start propogating at 3 discrete points whoch join up		webcam 1		Fissure 2	F2a	08:18:07		08:20:00	08:20:00	00:01:53	113	72.8	0.644248	38.6549		13:18 (15/1)					2a	webcam 1	119	41	72.8	78	12	71.2091				08:08:38	2024-01-14 08:08:38	1b	0.015	0.056	0.056	131.4	165.668	2958.35	44.3753	165.668	187.63	2.90645	3.01214	47.2818
2024-01-14	08:14:15	F1b(a)	northern most part of fissure 1b opens, when it grows, it never actually connects up to the rest of the fissure, so I want to distinguish this segment from the rest of the fissure		webcam 1			F2b	08:19:20		08:28:11	08:28:11	00:08:51	531	41.4	0.0779661	4.67797		11:46 (15/1)					2b	webcam 1	121	56	41.4	65	25	37.5211				08:08:51	2024-01-14 08:08:51	1b	0.019	0.056	0.056	131.4	165.668	2958.35	56.2087	165.668	187.63	2.90645	3.01214	59.1152
2024-01-14	08:14:30	F1c	fissure reaches southernmost extent		webcam 1			F2c	09:07:55		09:15:29	09:15:29	00:07:34	454	49.6	0.109251	6.55507	11:40:00	22:22 (14/1)					2c	webcam 1	127	42	49.6	85	5	49.4113				08:09:25	2024-01-14 08:09:25	1b	0.017	0.056	0.056	131.4	165.668	2958.35	50.292	165.668	187.63	2.90645	3.01214	53.1985
2024-01-14	08:14:32	F1d	southern most extent reached		webcam 1		Fissure 3	F3a	12:09:50	12:19:58		12:19:58	00:10:08	608	33.4	0.0549342	3.29605	23:00:00	01:31:20 (15/1)					3a	webcam 1	146	20	33.4	126	-36	27.0212				08:10:30	2024-01-14 08:10:30	1b	0.014	0.056	0.056	131.4	165.668	2958.35	41.417	165.668	187.63	2.90645	3.01214	44.3234
2024-01-14	08:15:00			something really weird happens with the camera and we lose about a minute and a half of footage	webcam 1			F3b	12:06:07			12:10:33	00:04:26	266	80	0.300752	18.0451	23:00:00	01:24:54 (15/1)					3b	webcam 1	148	29	80	119	-29	69.9696				08:11:34	2024-01-14 08:11:34	1b	0.013	0.056	0.056	131.4	165.668	2958.35	38.4586	165.668	187.63	2.90645	3.01214	41.3651
2024-01-14	08:15:03	F1d	full northern extent reached		webcam 1			F3c	12:32:24		12:37:01	12:37:01	00:04:37	277	20.6	0.0743682	4.46209	23:00:00	04:00 (15/1)					3c	webcam 1	150	24	20.6	126	-36	16.6658				08:12:14	2024-01-14 08:12:14	1b	0.011	0.056	0.056	131.4	165.668	2958.35	32.5419	165.668	187.63	2.90645	3.01214	35.4483
2024-01-14	08:16:23	F1e	when the camera comes back fissure 1e has already propogated, I will take Gro's start time of 08:16	camera recovers	webcam 1			F3d	12:50:19			immediately at full extent		60	5.5	0.0916667	5.5	15:00 cone concentration, 18:00 cone activity intermittent	18:52:10 (14/1)					3d	webcam 1	151	28	5.5	123	-33	4.61269				08:12:51	2024-01-14 08:12:51	1b	0.009	0.056	0.056	131.4	165.668	2958.35	26.6252	165.668	187.63	2.90645	3.01214	29.5316
2024-01-14	08:18:07	F2a	fissure opens on its northern end		webcam 1			F3e	13:01:13			immediately at full extent		60	6.5	0.108333	6.5		14:24:26 (14/1)					3e	webcam 1	151	36	6.5	115	-25	5.891				08:13:49	2024-01-14 08:13:49	1b	0.009	0.056	0.056	131.4	165.668	2958.35	26.6252	165.668	187.63	2.90645	3.01214	29.5316
2024-01-14	08:18:16	F1e	full southern extent reached		webcam 1										986																				08:14:01	2024-01-14 08:14:01	1b	0.01	0.056	0.056	131.4	165.668	2958.35	29.5835	165.668	187.63	2.90645	3.01214	32.49
2024-01-14	08:18:35	F2a?	small fissure opens between the ends of F1e and F1d		webcam 1																														08:14:32	2024-01-14 08:14:32	1b	0.013	0.056	0.056	131.4	165.668	2958.35	38.4586	165.668	187.63	2.90645	3.01214	41.3651
2024-01-14	08:19:20	F2b	fissure opens at its most northern extent, actual fissure is hidden behind a mound, so im going off the glow seen		webcam 1																														08:15:01	2024-01-14 08:15:01	1b	0.012	0.056	0.056	131.4	165.668	2958.35	35.5002	165.668	187.63	2.90645	3.01214	38.4067
2024-01-14	08:20:00	F2a	southernmost extent reached		webcam 1																														08:16:23	2024-01-14 08:16:23	1b	0.01	0.056	0.056	131.4	165.668	2958.35	29.5835	165.668	187.63	2.90645	3.01214	32.49
2024-01-14	08:21:42	F1b(a)	southernmost extent of this small fisure segment reached		webcam 1																														08:16:41	2024-01-14 08:16:41	1b	0.01	0.056	0.056	131.4	165.668	2958.35	29.5835	165.668	187.63	2.90645	3.01214	32.49
2024-01-14	08:28:11	F2b	southern most extent reached		webcam 1																														08:17:21	2024-01-14 08:17:21	1b	0.012	0.06	0.06	131.4	165.668	2761.13	33.1336	165.668	187.63	2.71587	2.80793	35.8494
2024-01-14	08:36:23			camera moves	webcam 1																														08:18:29	2024-01-14 08:18:29	1b	0.012	0.06	0.06	131.4	165.668	2761.13	33.1336	165.668	187.63	2.71587	2.80793	35.8494
2024-01-14	08:51:24	F1a	fissure 1 propogates, doesn’t grow quickly at all, still basically the same size at the end of the hour		webcam 1																														08:18:54	2024-01-14 08:18:54	1b	0.011	0.06	0.06	131.4	165.668	2761.13	30.3724	165.668	187.63	2.71587	2.80793	33.0883
2024-01-14	09:01:20	F1a	fissure seems to have stoped propogating to the north	massively hidden behind a hill so really hard to tell	webcam 1																														08:19:53	2024-01-14 08:19:53	1b	0.015	0.06	0.06	131.4	165.668	2761.13	41.417	165.668	187.63	2.71587	2.80793	44.1328
2024-01-14	09:07:55	F2c	faint glob behind the hill starts, because there is a hill in the way, we cant see if the fissure has opened, but I think it is likely that it has this is followed shortly by gas emmisions		webcam 1																														08:20:25	2024-01-14 08:20:25	1b	0.013	0.06	0.06	131.4	165.668	2761.13	35.8947	165.668	187.63	2.71587	2.80793	38.6106
2024-01-14	09:15:29	F2c	fissure stops propogating to the south		webcam 1																														08:21:30	2024-01-14 08:21:30	1b	0.018	0.06	0.06	131.4	165.668	2761.13	49.7003	165.668	187.63	2.71587	2.80793	52.4162
2024-01-14	09:17:43		fissures all seem to be quite stable from this point onwards	camera moves to focus on the main part of the fissure, fissure 1a now goes off the screen	webcam 1																														08:23:14	2024-01-14 08:23:14	1b	0.012	0.06	0.06	131.4	165.668	2761.13	33.1336	165.668	187.63	2.71587	2.80793	35.8494
2024-01-14	10:00:00		activity in fissures 1 and 2 seems to be continuous, no noticable shortening in any of the segments	from this point also the camera moves a lot to look at the lava flows, not the fissures	webcam 1																														08:25:29	2024-01-14 08:25:29	1b	0.013	0.06	0.06	131.4	165.668	2761.13	35.8947	165.668	187.63	2.71587	2.80793	38.6106
2024-01-14	11:03:00	F2	activity seems continuous	camera focuses on fissure 2, the lava and the barriers	webcam 1																														08:28:30	2024-01-14 08:28:30	1b	0.012	0.06	0.06	131.4	165.668	2761.13	33.1336	165.668	187.63	2.71587	2.80793	35.8494
2024-01-14	11:40:00	F2c	southern end may be dying		webcam 1																														08:31:04	2024-01-14 08:31:04	1b	0.016	0.06	0.06	131.4	165.668	2761.13	44.1781	165.668	187.63	2.71587	2.80793	46.8939
2024-01-14	11:46:58	F2c	dead?		webcam 1																														08:35:49	2024-01-14 08:35:49	1b	0.01	0.06	0.06	131.4	165.668	2761.13	27.6113	165.668	187.63	2.71587	2.80793	30.3272
2024-01-14	12:05:26	F3b	gassy white patch on the ground showing fissure 3 is about to initiate	water on camera in the area of f3 :(	reykjanes 2																														08:38:23	2024-01-14 08:38:23	1b	0.008	0.054	0.054	131.4	165.668	3067.92	24.5434	165.668	187.63	3.01214	3.12581	27.5555
2024-01-14	12:06:07	F3b	small linear gas plume showing F3 has now initiated	water on lense	reykjanes 2																														08:41:30	2024-01-14 08:41:30	1b	0.009	0.054	0.054	131.4	165.668	3067.92	27.6113	165.668	187.63	3.01214	3.12581	30.6234
2024-01-14	12:08:41	f3 b	first fire fountain visible, could have happened before but there is lots of steam obstructing the view	water on lens making it hard to see fire fountains	reykjanes 2																														08:44:37	2024-01-14 08:44:37	1b	0.008	0.054	0.054	131.4	165.668	3067.92	24.5434	165.668	187.63	3.01214	3.12581	27.5555
2024-01-14	12:08:55	F3		gas plume clears so you can see the fissure more clearly	reykjanes 2																														08:47:43	2024-01-14 08:47:43	1b	0.008	0.054	0.054	131.4	165.668	3067.92	24.5434	165.668	187.63	3.01214	3.12581	27.5555
2024-01-14	12:09:50	F3a	gas plume shows initiation of new fissure sgement, fissure 3 seems significantly more gassy than the others, more ground water interaction?		reykjanes 2																														08:50:53	2024-01-14 08:50:53	1b	0.007	0.054	0.054	131.4	165.668	3067.92	21.4755	165.668	187.63	3.01214	3.12581	24.4876
2024-01-14	12:10:33	F3b	I think the fissure has stopped propogating? Really hard to tell, all the cameras are zoomed out so cant see closely, but there is a line iof gas on the floor that isnt here before this point, and afterwards has lava, whoch I think signals fissure propogation, used all the cameras to work back to this point	really zoomed out so hard to tell	reykjanes 2																														08:53:57	2024-01-14 08:53:57	1b	0.006	0.054	0.054	131.4	165.668	3067.92	18.4075	165.668	187.63	3.01214	3.12581	21.4197
2024-01-14	12:11:00	F3	2 fissure segments are visible, they seem to be at an angle to one another	camera zooms into fissure	reykjanes 2																														08:56:33	2024-01-14 08:56:33	1b	0.006	0.054	0.054	131.4	165.668	3067.92	18.4075	165.668	187.63	3.01214	3.12581	21.4197
2024-01-14	12:11:14	F3b	by the time the camera zooms in, the full southern extent has already been reached		reykjanes2																														08:59:09	2024-01-14 08:59:09	1b	0.004	0.054	0.054	131.4	165.668	3067.92	12.2717	165.668	187.63	3.01214	3.12581	15.2838
2024-01-14	12:14:52	F3b	by the time the caqmera pans to the fissure, it has already reached its maximum extent		RUV4																														09:04:01	2024-01-14 09:04:01	1b	0.004	0.054	0.054	131.4	165.668	3067.92	12.2717	165.668	187.63	3.01214	3.12581	15.2838
2024-01-14	12:19:58	F3a	full northern extent reached end is slightly disjointed from the rest of the fissure		reykjanes 2																														09:08:53	2024-01-14 09:08:53	1b	0.007	0.054	0.054	131.4	165.668	3067.92	21.4755	165.668	187.63	3.01214	3.12581	24.4876
2024-01-14	12:20:01	F3b	by the time the camera pans to the fissure, it has already reached its full extent		webcam 1																														09:10:55	2024-01-14 09:10:55	1b	0.006	0.054	0.054	131.4	165.668	3067.92	18.4075	165.668	187.63	3.01214	3.12581	21.4197
2024-01-14	12:32:24	F3c	gas plume signals opening of new fissure, fissure opens at its northernmost extent		reykjanes 2																														09:15:46	2024-01-14 09:15:46	1b	0.007	0.054	0.054	131.4	165.668	3067.92	21.4755	165.668	187.63	3.01214	3.12581	24.4876
2024-01-14	12:37:01	F3c	fissure reaches southernmost extent	zoomed out so hard to tell	reykjanes 2																														09:20:07	2024-01-14 09:20:07	1b	0.01	0.067	0.067	131.4	165.668	2472.65	24.7265	165.668	187.63	2.43629	2.51012	27.1628
2024-01-14	12:50:19	F3d	fissure propogates south, the plume is black showing interaction with ground water	quite zoomed out	reykjanes 2																														09:25:08	2024-01-14 09:25:08	1b	0.011	0.067	0.067	131.4	165.668	2472.65	27.1992	165.668	187.63	2.43629	2.51012	29.6355
2024-01-14	13:00:00	F1 and F2	fissures are becoming more segmented and firefountains are not as high	hard to see, really far away	webcam 2x																														09:30:09	2024-01-14 09:30:09	1b	0.016	0.067	0.067	131.4	165.668	2472.65	39.5625	165.668	187.63	2.43629	2.51012	41.9988
2024-01-14	13:01:13	F3e	most southern fissure segment is now open, really small with pretty mediocre firefountains	really zoomed out so hard to tell, there is gas emmisions right now, and in a minute there is visible lava	reykjanes 2																														09:35:10	2024-01-14 09:35:10	1b	0.01	0.067	0.067	131.4	165.668	2472.65	24.7265	165.668	187.63	2.43629	2.51012	27.1628
2024-01-14	14:13:38	F1a	fissure dead, lets out one last burst then no more activity is visible	also blocked by a ridge so a bit hard to see, but im pretty convinced	webcam 2x																														09:40:09	2024-01-14 09:40:09	1b	0.01	0.067	0.067	131.4	165.668	2472.65	24.7265	165.668	187.63	2.43629	2.51012	27.1628
2024-01-14	14:24:26	F3e	dead, hard to see, before this the bursts of eruptions were very sparse, I think they have now stopped		webcam 1																														09:44:54	2024-01-14 09:44:54	1b	0.009	0.067	0.067	131.4	165.668	2472.65	22.2539	165.668	187.63	2.43629	2.51012	24.6902
2024-01-14	14:47:19		first house starts to burn		RUV4																														09:50:00	2024-01-14 09:50:00	1b	0.009	0.067	0.067	131.4	165.668	2472.65	22.2539	165.668	187.63	2.43629	2.51012	24.6902
2024-01-14	15:00:00	F3d	southern fissure activity appears to have concentrated into a singular cone		webcam 1																														09:55:04	2024-01-14 09:55:04	1b	0.01	0.067	0.067	131.4	165.668	2472.65	24.7265	165.668	187.63	2.43629	2.51012	27.1628
2024-01-14	15:03:00		second house is burning		RUV4																														09:59:46	2024-01-14 09:59:46	1b	0.006	0.067	0.067	131.4	165.668	2472.65	14.8359	165.668	187.63	2.43629	2.51012	17.2722
2024-01-14	16:33:02		third house is burning		webcam 1																														10:04:57	2024-01-14 10:04:57	1b	0.009	0.067	0.067	131.4	165.668	2472.65	22.2539	165.668	187.63	2.43629	2.51012	24.6902
2024-01-14	18:00:00	F3d	cone activity is very intermittent		webcam 1																														10:10:00	2024-01-14 10:10:00	1b	0.013	0.067	0.067	131.4	165.668	2472.65	32.1445	165.668	187.63	2.43629	2.51012	34.5808
2024-01-14	18:52:10	F3d	cone is dead		webcam 1																														10:17:35	2024-01-14 10:17:35	1b	0.011	0.077	0.077	131.4	165.668	2151.53	23.6668	165.668	187.63	2.12395	2.17984	25.7908
2024-01-14	20:00:00	F3	fissure is shortening		webcam 1																														10:20:05	2024-01-14 10:20:05	1b	0.015	0.077	0.077	131.4	165.668	2151.53	32.2729	165.668	187.63	2.12395	2.17984	34.3969
2024-01-14	20:06:40	F1b(a)	dead, maybe some very small bursts after this, but theyre so infrequent and very small so could just be gases		webcam 2x																														10:40:06	2024-01-14 10:40:06	1b	0.011	0.068	0.068	131.4	165.668	2436.29	26.7992	165.668	187.63	2.40098	2.47265	29.2002
2024-01-14	22:22:00	F2c	fisssure now seems to be dead after having concentrated into one cone	I think this is fissure 2 but there are so many camera angles im getting confused	reykjanes 2																														10:45:02	2024-01-14 10:45:02	1b	0.009	0.062	0.062	131.4	165.668	2672.06	24.0486	165.668	187.63	2.62965	2.71587	26.6782
2024-01-14	22:39:00	F2b	dead, but quite far away so hard to see, defo no firefountains after this, slight glow from fissure but seems likely its just residual lava	far, had to see	webcam 2x																														10:49:55	2024-01-14 10:49:55	1b	0.01	0.062	0.062	131.4	165.668	2672.06	26.7206	165.668	187.63	2.62965	2.71587	29.3503
2024-01-14	23:00:00	F3	fissure is now in 3 distinct segments and dies significantly over this time		webcam 1																														10:54:58	2024-01-14 10:54:58	1b	0.009	0.062	0.062	131.4	165.668	2672.06	24.0486	165.668	187.63	2.62965	2.71587	26.6782
2024-01-14	23:00:00	F1 and F2	activity is still constant along these fissures, the middle is dying with smaller fountains but still active		reykjanes 2																														10:59:47	2024-01-14 10:59:47	1b	0.008	0.062	0.062	131.4	165.668	2672.06	21.3765	165.668	187.63	2.62965	2.71587	24.0061
2024-01-15	01:24:54	F3c	vent is now dead, the other 2 vents have very little activity, 3a is barely glowing	poor quality, quite hard to see	webcam 1																														11:03:01	2024-01-14 11:03:01	1b	0.016	0.13	0.13	131.4	165.668	1274.37	20.3899	165.668	187.63	1.26464	1.28425	21.6545
2024-01-15	01:31:20	F3a	northernmost vent is now dead, the other vents have very small fountains	poor quality, really hard to see	webcam 1																														#REF!	#REF!										0
2024-01-15	01:57:00	F1d	appears to be dead, this is the time of the last fire fountain, fissure 1e mights also be dead at this point, hard to tell where fissure 1 stops and fissure 2 starts	far, hard to see	webcam 2x																														08:06:45	2024-01-14 08:06:45	1c	0.003	0.01	0.05	197.2	190.481	3809.61	11.4288	38.0961	43.1465	3.73491	3.88736	15.1637
2024-01-15	03:00:00	F2	fissures a and b have concentrated into 3 small cones		reykjanes 2																														08:07:23	2024-01-14 08:07:23	1c	0.005	0.015	0.05	197.2	190.481	3809.61	19.0481	57.1442	64.7198	3.73491	3.88736	22.783
2024-01-15	03:00:00	F1b	concentrated into 2 or 3 cones		reykjanes 2																														08:08:12	2024-01-14 08:08:12	1c	0.004	0.017	0.05	197.2	190.481	3809.61	15.2384	64.7634	73.3491	3.73491	3.88736	18.9734
2024-01-15	03:43:00	F1c	fissure seems to be dead now, really hard to tell the difference between glowing lava and fissure, ive taken the bits that glow in the exact same place all the time as fissure, this stops glowing around now	far, hard to see	webcam 2x																														08:08:38	2024-01-14 08:08:38	1c	0.006	0.02	0.05	197.2	190.481	3809.61	22.8577	76.1922	86.293	3.73491	3.88736	26.5926
2024-01-15	04:00:00	F3b	vent is glowing, but hardly anything coming out, pretty dead		webcam 1																														08:09:25	2024-01-14 08:09:25	1c	0.003	0.027	0.05	197.2	190.481	3809.61	11.4288	102.86	116.496	3.73491	3.88736	15.1637
2024-01-15	06:15:00	F1b	concentrated into 1 cone		reykjanes 2																														08:10:30	2024-01-14 08:10:30	1c	0.005	0.032	0.05	197.2	190.481	3809.61	19.0481	121.908	138.069	3.73491	3.88736	22.783
2024-01-15	11:46:00	F2b	southernmost cone is dead, still glowing slightly, but basically nothing has come out of the fissure for the last hour	classification of death now rather than before might be a product of increasing light so glow is less visible	reykjanes 2																														08:11:34	2024-01-14 08:11:34	1c	0.004	0.035	0.05	197.2	190.481	3809.61	15.2384	133.336	151.013	3.73491	3.88736	18.9734
2024-01-15	13:17:00	F2a	middle cone is now dead, barely glowing, nothing coming out		reykjanes 2																														08:12:14	2024-01-14 08:12:14	1c	0.004	0.042	0.05	197.2	190.481	3809.61	15.2384	160.004	181.215	3.73491	3.88736	18.9734
2024-01-15	13:18:00	F2a	I think the cone is now dead, and so the whole fissure is now dead, but I cant tell for sure because of the cameras, it was pretty much dead before the camera moved	the camera has decoded that the other f2 cone is dead because it has moves away and I can no longer see it, you cannot see this vent in any other camera	reykjanes 2																														08:12:51	2024-01-14 08:12:51	1c	0.005	0.045	0.05	197.2	190.481	3809.61	19.0481	171.433	194.159	3.73491	3.88736	22.783
2024-01-15	22:46:28	F1b	stombolian activity seems to top, the cone is now just glowing, some tiny bursts after this		reykjanes 2																														08:13:49	2024-01-14 08:13:49	1c	0.006	0.046	0.05	197.2	190.481	3809.61	22.8577	175.242	198.474	3.73491	3.88736	26.5926
2024-01-16	01:00:00	F1b	cone glowing from just one spot		reykjanes 2																														08:14:01	2024-01-14 08:14:01	1c	0.005	0.048	0.05	197.2	190.481	3809.61	19.0481	182.861	207.103	3.73491	3.88736	22.783
2024-01-16	01:00:00			Northern lights!!!	webcam 2x																														08:14:32	2024-01-14 08:14:32	1c	0.006	0.05	0.05	197.2	190.481	3809.61	22.8577	190.481	215.733	3.73491	3.88736	26.5926
2024-01-16	01:13:00			camera moves angle and can't see anything anymore	reykjanes 2																														08:15:01	2024-01-14 08:15:01	1c	0.005	0.05	0.05	197.2	190.481	3809.61	19.0481	190.481	215.733	3.73491	3.88736	22.783
2024-01-16	02:00:00	F1b	glow from cone is still slightly visible, but barely	far so hard to see	webcam 2x																														08:16:23	2024-01-14 08:16:23	1c	0.006	0.05	0.05	197.2	190.481	3809.61	22.8577	190.481	215.733	3.73491	3.88736	26.5926
2024-01-16	10:00:00	F1b	sun rises and fumes are still being emitted from the cone, the cone is still alive? It was still barely glowing before the sun rose		webcam 2x																														08:16:41	2024-01-14 08:16:41	1c	0.007	0.05	0.05	197.2	190.481	3809.61	26.6673	190.481	215.733	3.73491	3.88736	30.4022
2024-01-16	12:00:00	F1b	footage ends and cone is still degassing, I think we have to call the death at the end of strombolian activity because im not convinced any material was coming out while the cone was just glowing		webcam 2x																														08:17:21	2024-01-14 08:17:21	1c	0.006	0.053	0.053	197.2	190.481	3593.97	21.5638	190.481	215.733	3.52742	3.66309	25.0913
																																			08:18:29	2024-01-14 08:18:29	1c	0.006	0.053	0.053	197.2	190.481	3593.97	21.5638	190.481	215.733	3.52742	3.66309	25.0913
																																			08:18:54	2024-01-14 08:18:54	1c	0.005	0.053	0.053	197.2	190.481	3593.97	17.9699	190.481	215.733	3.52742	3.66309	21.4973
																																			08:19:53	2024-01-14 08:19:53	1c	0.006	0.053	0.053	197.2	190.481	3593.97	21.5638	190.481	215.733	3.52742	3.66309	25.0913
																																			08:20:25	2024-01-14 08:20:25	1c	0.005	0.053	0.053	197.2	190.481	3593.97	17.9699	190.481	215.733	3.52742	3.66309	21.4973
																																			08:21:30	2024-01-14 08:21:30	1c	0.007	0.053	0.053	197.2	190.481	3593.97	25.1578	190.481	215.733	3.52742	3.66309	28.6852
																																			08:23:14	2024-01-14 08:23:14	1c	0.004	0.053	0.053	197.2	190.481	3593.97	14.3759	190.481	215.733	3.52742	3.66309	17.9033
																																			08:25:29	2024-01-14 08:25:29	1c	0.007	0.053	0.053	197.2	190.481	3593.97	25.1578	190.481	215.733	3.52742	3.66309	28.6852
																																			08:28:30	2024-01-14 08:28:30	1c	0.006	0.053	0.053	197.2	190.481	3593.97	21.5638	190.481	215.733	3.52742	3.66309	25.0913
																																			08:31:04	2024-01-14 08:31:04	1c	0.007	0.053	0.053	197.2	190.481	3593.97	25.1578	190.481	215.733	3.52742	3.66309	28.6852
																																			08:35:49	2024-01-14 08:35:49	1c	0.006	0.053	0.053	197.2	190.481	3593.97	21.5638	190.481	215.733	3.52742	3.66309	25.0913
																																			08:38:23	2024-01-14 08:38:23	1c	0.004	0.05	0.05	197.2	190.481	3809.61	15.2384	190.481	215.733	3.73491	3.88736	18.9734
																																			08:41:30	2024-01-14 08:41:30	1c	0.005	0.05	0.05	197.2	190.481	3809.61	19.0481	190.481	215.733	3.73491	3.88736	22.783
																																			08:44:37	2024-01-14 08:44:37	1c	0.004	0.05	0.05	197.2	190.481	3809.61	15.2384	190.481	215.733	3.73491	3.88736	18.9734
																																			08:47:43	2024-01-14 08:47:43	1c	0.004	0.05	0.05	197.2	190.481	3809.61	15.2384	190.481	215.733	3.73491	3.88736	18.9734
																																			08:50:53	2024-01-14 08:50:53	1c	0.003	0.05	0.05	197.2	190.481	3809.61	11.4288	190.481	215.733	3.73491	3.88736	15.1637
																																			08:53:57	2024-01-14 08:53:57	1c	0.003	0.05	0.05	197.2	190.481	3809.61	11.4288	190.481	215.733	3.73491	3.88736	15.1637
																																			08:56:33	2024-01-14 08:56:33	1c	0.005	0.05	0.05	197.2	190.481	3809.61	19.0481	190.481	215.733	3.73491	3.88736	22.783
																																			08:59:09	2024-01-14 08:59:09	1c	0.003	0.05	0.05	197.2	190.481	3809.61	11.4288	190.481	215.733	3.73491	3.88736	15.1637
																																			09:04:01	2024-01-14 09:04:01	1c	0.004	0.05	0.05	197.2	190.481	3809.61	15.2384	190.481	215.733	3.73491	3.88736	18.9734
																																			09:08:53	2024-01-14 09:08:53	1c	0.003	0.05	0.05	197.2	190.481	3809.61	11.4288	190.481	215.733	3.73491	3.88736	15.1637
																																			09:10:55	2024-01-14 09:10:55	1c	0.003	0.05	0.05	197.2	190.481	3809.61	11.4288	190.481	215.733	3.73491	3.88736	15.1637
																																			09:15:46	2024-01-14 09:15:46	1c	0.003	0.05	0.05	197.2	190.481	3809.61	11.4288	190.481	215.733	3.73491	3.88736	15.1637
																																			09:20:07	2024-01-14 09:20:07	1c	0.004	0.06	0.06	197.2	190.481	3174.68	12.6987	190.481	215.733	3.12263	3.22848	15.8213
																																			09:25:08	2024-01-14 09:25:08	1c	0.006	0.06	0.06	197.2	190.481	3174.68	19.0481	190.481	215.733	3.12263	3.22848	22.1707
																																			09:30:09	2024-01-14 09:30:09	1c	0.008	0.06	0.06	197.2	190.481	3174.68	25.3974	190.481	215.733	3.12263	3.22848	28.52
																																			09:35:10	2024-01-14 09:35:10	1c	0.006	0.06	0.06	197.2	190.481	3174.68	19.0481	190.481	215.733	3.12263	3.22848	22.1707
																																			09:40:09	2024-01-14 09:40:09	1c	0.005	0.06	0.06	197.2	190.481	3174.68	15.8734	190.481	215.733	3.12263	3.22848	18.996
																																			09:44:54	2024-01-14 09:44:54	1c	0.005	0.06	0.06	197.2	190.481	3174.68	15.8734	190.481	215.733	3.12263	3.22848	18.996
																																			09:50:00	2024-01-14 09:50:00	1c	0.003	0.06	0.06	197.2	190.481	3174.68	9.52403	190.481	215.733	3.12263	3.22848	12.6467
																																			09:55:04	2024-01-14 09:55:04	1c	0.004	0.06	0.06	197.2	190.481	3174.68	12.6987	190.481	215.733	3.12263	3.22848	15.8213
																																			09:59:46	2024-01-14 09:59:46	1c	0.004	0.06	0.06	197.2	190.481	3174.68	12.6987	190.481	215.733	3.12263	3.22848	15.8213
																																			10:04:57	2024-01-14 10:04:57	1c	0.005	0.06	0.06	197.2	190.481	3174.68	15.8734	190.481	215.733	3.12263	3.22848	18.996
																																			10:10:00	2024-01-14 10:10:00	1c	0.005	0.06	0.06	197.2	190.481	3174.68	15.8734	190.481	215.733	3.12263	3.22848	18.996
																																			10:17:35	2024-01-14 10:17:35	1c	0.006	0.062	0.062	197.2	190.481	3072.27	18.4336	190.481	215.733	3.0235	3.12263	21.4571
																																			10:20:05	2024-01-14 10:20:05	1c	0.007	0.062	0.062	197.2	190.481	3072.27	21.5059	190.481	215.733	3.0235	3.12263	24.5294
																																			10:40:06	2024-01-14 10:40:06	1c	0.004	0.06	0.06	197.2	190.481	3174.68	12.6987	190.481	215.733	3.12263	3.22848	15.8213
																																			10:45:02	2024-01-14 10:45:02	1c	0.005	0.055	0.055	197.2	190.481	3463.28	17.3164	190.481	215.733	3.40144	3.52742	20.7179
																																			10:49:55	2024-01-14 10:49:55	1c	0.005	0.055	0.055	197.2	190.481	3463.28	17.3164	190.481	215.733	3.40144	3.52742	20.7179
																																			10:54:58	2024-01-14 10:54:58	1c	0.005	0.055	0.055	197.2	190.481	3463.28	17.3164	190.481	215.733	3.40144	3.52742	20.7179
																																			10:59:47	2024-01-14 10:59:47	1c	0.005	0.055	0.055	197.2	190.481	3463.28	17.3164	190.481	215.733	3.40144	3.52742	20.7179
																																			11:03:01	2024-01-14 11:03:01	1c	0.006	0.085	0.085	197.2	190.481	2240.95	13.4457	190.481	215.733	2.21489	2.26763	15.6606
																																			#REF!	#REF!										0			0
																																			08:13:53	2024-01-14 08:13:53	1d	0.003	0.013	0.03	57	45.5222	1517.41	4.55222	19.7263	22.3414	1.46846	1.56973	6.02068
																																			08:13:57	2024-01-14 08:13:57	1d	0.005	0.013	0.03	57	45.5222	1517.41	7.58704	19.7263	22.3414	1.46846	1.56973	9.0555
																																			08:14:01	2024-01-14 08:14:01	1d	0.005	0.015	0.03	57	45.5222	1517.41	7.58704	22.7611	25.7786	1.46846	1.56973	9.0555
																																			08:14:32	2024-01-14 08:14:32	1d	0.007	0.027	0.03	57	45.5222	1517.41	10.6219	40.97	46.4014	1.46846	1.56973	12.0903
																																			08:15:01	2024-01-14 08:15:01	1d	0.008	0.03	0.03	57	45.5222	1517.41	12.1393	45.5222	51.5571	1.46846	1.56973	13.6077
																																			08:16:23	2024-01-14 08:16:23	1d	0.009	0.03	0.03	57	45.5222	1517.41	13.6567	45.5222	51.5571	1.46846	1.56973	15.1251
																																			08:16:41	2024-01-14 08:16:41	1d	0.008	0.03	0.03	57	45.5222	1517.41	12.1393	45.5222	51.5571	1.46846	1.56973	13.6077
																																			08:17:21	2024-01-14 08:17:21	1d	0.009	0.027	0.027	57	45.5222	1686.01	15.1741	45.5222	51.5571	1.62579	1.75085	16.7999
																																			08:18:29	2024-01-14 08:18:29	1d	0.008	0.027	0.027	57	45.5222	1686.01	13.4881	45.5222	51.5571	1.62579	1.75085	15.1139
																																			08:18:54	2024-01-14 08:18:54	1d	0.007	0.027	0.027	57	45.5222	1686.01	11.8021	45.5222	51.5571	1.62579	1.75085	13.4279
																																			08:19:53	2024-01-14 08:19:53	1d	0.008	0.027	0.027	57	45.5222	1686.01	13.4881	45.5222	51.5571	1.62579	1.75085	15.1139
																																			08:20:25	2024-01-14 08:20:25	1d	0.009	0.027	0.027	57	45.5222	1686.01	15.1741	45.5222	51.5571	1.62579	1.75085	16.7999
																																			08:21:30	2024-01-14 08:21:30	1d	0.01	0.027	0.027	57	45.5222	1686.01	16.8601	45.5222	51.5571	1.62579	1.75085	18.4859
																																			08:23:14	2024-01-14 08:23:14	1d	0.008	0.027	0.027	57	45.5222	1686.01	13.4881	45.5222	51.5571	1.62579	1.75085	15.1139
																																			08:25:29	2024-01-14 08:25:29	1d	0.009	0.027	0.027	57	45.5222	1686.01	15.1741	45.5222	51.5571	1.62579	1.75085	16.7999
																																			08:28:30	2024-01-14 08:28:30	1d	0.009	0.027	0.027	57	45.5222	1686.01	15.1741	45.5222	51.5571	1.62579	1.75085	16.7999
																																			08:31:04	2024-01-14 08:31:04	1d	0.011	0.027	0.027	57	45.5222	1686.01	18.5461	45.5222	51.5571	1.62579	1.75085	20.1719
																																			08:35:49	2024-01-14 08:35:49	1d	0.009	0.027	0.027	57	45.5222	1686.01	15.1741	45.5222	51.5571	1.62579	1.75085	16.7999
																																			08:38:23	2024-01-14 08:38:23	1d	0.007	0.022	0.022	57	45.5222	2069.19	14.4843	45.5222	51.5571	1.97923	2.16772	16.4636
																																			08:41:30	2024-01-14 08:41:30	1d	0.006	0.022	0.022	57	45.5222	2069.19	12.4152	45.5222	51.5571	1.97923	2.16772	14.3944
																																			08:44:37	2024-01-14 08:44:37	1d	0.006	0.022	0.022	57	45.5222	2069.19	12.4152	45.5222	51.5571	1.97923	2.16772	14.3944
																																			08:47:43	2024-01-14 08:47:43	1d	0.007	0.022	0.022	57	45.5222	2069.19	14.4843	45.5222	51.5571	1.97923	2.16772	16.4636
																																			08:50:53	2024-01-14 08:50:53	1d	0.007	0.022	0.022	57	45.5222	2069.19	14.4843	45.5222	51.5571	1.97923	2.16772	16.4636
																																			08:53:57	2024-01-14 08:53:57	1d	0.006	0.022	0.022	57	45.5222	2069.19	12.4152	45.5222	51.5571	1.97923	2.16772	14.3944
																																			08:56:33	2024-01-14 08:56:33	1d	0.005	0.022	0.022	57	45.5222	2069.19	10.346	45.5222	51.5571	1.97923	2.16772	12.3252
																																			08:59:09	2024-01-14 08:59:09	1d	0.006	0.022	0.022	57	45.5222	2069.19	12.4152	45.5222	51.5571	1.97923	2.16772	14.3944
																																			09:04:01	2024-01-14 09:04:01	1d	0.006	0.022	0.022	57	45.5222	2069.19	12.4152	45.5222	51.5571	1.97923	2.16772	14.3944
																																			09:08:53	2024-01-14 09:08:53	1d	0.005	0.022	0.022	57	45.5222	2069.19	10.346	45.5222	51.5571	1.97923	2.16772	12.3252
																																			09:10:55	2024-01-14 09:10:55	1d	0.007	0.022	0.022	57	45.5222	2069.19	14.4843	45.5222	51.5571	1.97923	2.16772	16.4636
																																			09:15:46	2024-01-14 09:15:46	1d	0.006	0.022	0.022	57	45.5222	2069.19	12.4152	45.5222	51.5571	1.97923	2.16772	14.3944
																																			09:20:07	2024-01-14 09:20:07	1d	0.006	0.028	0.028	57	45.5222	1625.79	9.75476	45.5222	51.5571	1.56973	1.68601	11.3245
																																			09:25:08	2024-01-14 09:25:08	1d	0.009	0.028	0.028	57	45.5222	1625.79	14.6321	45.5222	51.5571	1.56973	1.68601	16.2019
																																			09:30:09	2024-01-14 09:30:09	1d	0.008	0.028	0.028	57	45.5222	1625.79	13.0063	45.5222	51.5571	1.56973	1.68601	14.5761
																																			09:35:10	2024-01-14 09:35:10	1d	0.006	0.028	0.028	57	45.5222	1625.79	9.75476	45.5222	51.5571	1.56973	1.68601	11.3245
																																			09:40:09	2024-01-14 09:40:09	1d	0.007	0.028	0.028	57	45.5222	1625.79	11.3806	45.5222	51.5571	1.56973	1.68601	12.9503
																																			09:44:54	2024-01-14 09:44:54	1d	0.007	0.028	0.028	57	45.5222	1625.79	11.3806	45.5222	51.5571	1.56973	1.68601	12.9503
																																			09:50:00	2024-01-14 09:50:00	1d	0.009	0.028	0.028	57	45.5222	1625.79	14.6321	45.5222	51.5571	1.56973	1.68601	16.2019
																																			09:55:04	2024-01-14 09:55:04	1d	0.008	0.028	0.028	57	45.5222	1625.79	13.0063	45.5222	51.5571	1.56973	1.68601	14.5761
																																			09:59:46	2024-01-14 09:59:46	1d	0.005	0.028	0.028	57	45.5222	1625.79	8.12897	45.5222	51.5571	1.56973	1.68601	9.6987
																																			10:04:57	2024-01-14 10:04:57	1d	0.006	0.028	0.028	57	45.5222	1625.79	9.75476	45.5222	51.5571	1.56973	1.68601	11.3245
																																			10:10:00	2024-01-14 10:10:00	1d	0.006	0.028	0.028	57	45.5222	1625.79	9.75476	45.5222	51.5571	1.56973	1.68601	11.3245
																																			10:17:35	2024-01-14 10:17:35	1d	0.006	0.029	0.029	57	45.5222	1569.73	9.41839	45.5222	51.5571	1.51741	1.62579	10.9358
																																			10:20:05	2024-01-14 10:20:05	1d	0.008	0.029	0.029	57	45.5222	1569.73	12.5579	45.5222	51.5571	1.51741	1.62579	14.0753
																																			10:40:06	2024-01-14 10:40:06	1d	0.008	0.028	0.028	57	45.5222	1625.79	13.0063	45.5222	51.5571	1.56973	1.68601	14.5761
																																			10:45:02	2024-01-14 10:45:02	1d	0.006	0.024	0.024	57	45.5222	1896.76	11.3806	45.5222	51.5571	1.82089	1.97923	13.2014
																																			10:49:55	2024-01-14 10:49:55	1d	0.006	0.024	0.024	57	45.5222	1896.76	11.3806	45.5222	51.5571	1.82089	1.97923	13.2014
																																			10:54:58	2024-01-14 10:54:58	1d	0.005	0.024	0.024	57	45.5222	1896.76	9.4838	45.5222	51.5571	1.82089	1.97923	11.3047
																																			10:59:47	2024-01-14 10:59:47	1d	0.006	0.024	0.024	57	45.5222	1896.76	11.3806	45.5222	51.5571	1.82089	1.97923	13.2014
																																			11:03:01	2024-01-14 11:03:01	1d	0.007	0.039	0.039	57	45.5222	1167.24	8.17066	45.5222	51.5571	1.13806	1.19795	9.30871
																																			#REF!	#REF!										0			0
																																			08:16:26	2024-01-14 08:16:26	1e	0.004	0.008	0.021	61	60.9907	2904.32	11.6173	23.2346	26.3148	2.7723	3.04954	14.3896
																																			08:16:41	2024-01-14 08:16:41	1e	0.005	0.008	0.021	61	60.9907	2904.32	14.5216	23.2346	26.3148	2.7723	3.04954	17.2939
																																			08:17:41	2024-01-14 08:17:41	1e	0.007	0.011	0.022	61	60.9907	2772.3	19.4061	30.4954	34.5381	2.65177	2.90432	22.0579
																																			08:18:29	2024-01-14 08:18:29	1e	0.007	0.022	0.022	61	60.9907	2772.3	19.4061	60.9907	69.0763	2.65177	2.90432	22.0579
																																			08:18:29	2024-01-14 08:18:29	1e	0.007	0.022	0.022	61	60.9907	2772.3	19.4061	60.9907	69.0763	2.65177	2.90432	22.0579
																																			08:19:53	2024-01-14 08:19:53	1e	0.008	0.022	0.022	61	60.9907	2772.3	22.1784	60.9907	69.0763	2.65177	2.90432	24.8302
																																			08:20:25	2024-01-14 08:20:25	1e	0.006	0.022	0.022	61	60.9907	2772.3	16.6338	60.9907	69.0763	2.65177	2.90432	19.2856
																																			08:21:30	2024-01-14 08:21:30	1e	0.008	0.022	0.022	61	60.9907	2772.3	22.1784	60.9907	69.0763	2.65177	2.90432	24.8302
																																			08:23:14	2024-01-14 08:23:14	1e	0.005	0.022	0.022	61	60.9907	2772.3	13.8615	60.9907	69.0763	2.65177	2.90432	16.5133
																																			08:25:29	2024-01-14 08:25:29	1e	0.006	0.022	0.022	61	60.9907	2772.3	16.6338	60.9907	69.0763	2.65177	2.90432	19.2856
																																			08:28:30	2024-01-14 08:28:30	1e	0.005	0.022	0.022	61	60.9907	2772.3	13.8615	60.9907	69.0763	2.65177	2.90432	16.5133
																																			08:31:04	2024-01-14 08:31:04	1e	0.003	0.022	0.022	61	60.9907	2772.3	8.31691	60.9907	69.0763	2.65177	2.90432	10.9687
																																			08:35:49	2024-01-14 08:35:49	1e	0.007	0.022	0.022	61	60.9907	2772.3	19.4061	60.9907	69.0763	2.65177	2.90432	22.0579
																																			08:38:23	2024-01-14 08:38:23	1e	0.004	0.021	0.021	61	60.9907	2904.32	11.6173	60.9907	69.0763	2.7723	3.04954	14.3896
																																			08:41:30	2024-01-14 08:41:30	1e	0.005	0.021	0.021	61	60.9907	2904.32	14.5216	60.9907	69.0763	2.7723	3.04954	17.2939
																																			08:44:37	2024-01-14 08:44:37	1e	0.004	0.021	0.021	61	60.9907	2904.32	11.6173	60.9907	69.0763	2.7723	3.04954	14.3896
																																			08:47:43	2024-01-14 08:47:43	1e	0.004	0.021	0.021	61	60.9907	2904.32	11.6173	60.9907	69.0763	2.7723	3.04954	14.3896
																																			08:50:53	2024-01-14 08:50:53	1e	0.003	0.021	0.021	61	60.9907	2904.32	8.71296	60.9907	69.0763	2.7723	3.04954	11.4853
																																			08:53:57	2024-01-14 08:53:57	1e	0.003	0.021	0.021	61	60.9907	2904.32	8.71296	60.9907	69.0763	2.7723	3.04954	11.4853
																																			08:56:33	2024-01-14 08:56:33	1e	0.004	0.021	0.021	61	60.9907	2904.32	11.6173	60.9907	69.0763	2.7723	3.04954	14.3896
																																			08:59:09	2024-01-14 08:59:09	1e	0.003	0.021	0.021	61	60.9907	2904.32	8.71296	60.9907	69.0763	2.7723	3.04954	11.4853
																																			09:04:01	2024-01-14 09:04:01	1e	0.004	0.021	0.021	61	60.9907	2904.32	11.6173	60.9907	69.0763	2.7723	3.04954	14.3896
																																			09:08:53	2024-01-14 09:08:53	1e	0.003	0.021	0.021	61	60.9907	2904.32	8.71296	60.9907	69.0763	2.7723	3.04954	11.4853
																																			09:10:55	2024-01-14 09:10:55	1e	0.004	0.021	0.021	61	60.9907	2904.32	11.6173	60.9907	69.0763	2.7723	3.04954	14.3896
																																			09:15:46	2024-01-14 09:15:46	1e	0.004	0.021	0.021	61	60.9907	2904.32	11.6173	60.9907	69.0763	2.7723	3.04954	14.3896
																																			09:20:07	2024-01-14 09:20:07	1e	0.004	0.026	0.026	61	60.9907	2345.8	9.38319	60.9907	69.0763	2.25892	2.43963	11.6421
																																			09:25:08	2024-01-14 09:25:08	1e	0.004	0.026	0.026	61	60.9907	2345.8	9.38319	60.9907	69.0763	2.25892	2.43963	11.6421
																																			09:30:09	2024-01-14 09:30:09	1e	0.006	0.026	0.026	61	60.9907	2345.8	14.0748	60.9907	69.0763	2.25892	2.43963	16.3337
																																			09:35:10	2024-01-14 09:35:10	1e	0.006	0.026	0.026	61	60.9907	2345.8	14.0748	60.9907	69.0763	2.25892	2.43963	16.3337
																																			09:40:09	2024-01-14 09:40:09	1e	0.003	0.026	0.026	61	60.9907	2345.8	7.03739	60.9907	69.0763	2.25892	2.43963	9.2963
																																			09:44:54	2024-01-14 09:44:54	1e	0.006	0.026	0.026	61	60.9907	2345.8	14.0748	60.9907	69.0763	2.25892	2.43963	16.3337
																																			09:50:00	2024-01-14 09:50:00	1e	0.005	0.026	0.026	61	60.9907	2345.8	11.729	60.9907	69.0763	2.25892	2.43963	13.9879
																																			09:55:04	2024-01-14 09:55:04	1e	0.005	0.026	0.026	61	60.9907	2345.8	11.729	60.9907	69.0763	2.25892	2.43963	13.9879
																																			09:59:46	2024-01-14 09:59:46	1e	0.006	0.026	0.026	61	60.9907	2345.8	14.0748	60.9907	69.0763	2.25892	2.43963	16.3337
																																			10:04:57	2024-01-14 10:04:57	1e	0.006	0.026	0.026	61	60.9907	2345.8	14.0748	60.9907	69.0763	2.25892	2.43963	16.3337
																																			10:10:00	2024-01-14 10:10:00	1e	0.006	0.026	0.026	61	60.9907	2345.8	14.0748	60.9907	69.0763	2.25892	2.43963	16.3337
																																			10:17:35	2024-01-14 10:17:35	1e	0.004	0.028	0.028	61	60.9907	2178.24	8.71296	60.9907	69.0763	2.10313	2.25892	10.8161
																																			10:20:05	2024-01-14 10:20:05	1e	0.005	0.028	0.028	61	60.9907	2178.24	10.8912	60.9907	69.0763	2.10313	2.25892	12.9943
																																			10:40:06	2024-01-14 10:40:06	1e	0.004	0.026	0.026	61	60.9907	2345.8	9.38319	60.9907	69.0763	2.25892	2.43963	11.6421
																																			10:45:02	2024-01-14 10:45:02	1e	0.004	0.024	0.024	61	60.9907	2541.28	10.1651	60.9907	69.0763	2.43963	2.65177	12.6047
																																			10:49:55	2024-01-14 10:49:55	1e	0.004	0.024	0.024	61	60.9907	2541.28	10.1651	60.9907	69.0763	2.43963	2.65177	12.6047
																																			10:54:58	2024-01-14 10:54:58	1e	0.006	0.024	0.024	61	60.9907	2541.28	15.2477	60.9907	69.0763	2.43963	2.65177	17.6873
																																			10:59:47	2024-01-14 10:59:47	1e	0.003	0.024	0.024	61	60.9907	2541.28	7.62384	60.9907	69.0763	2.43963	2.65177	10.0635
																																			11:03:01	2024-01-14 11:03:01	1e	0.007	0.041	0.041	61	60.9907	1487.58	10.413	60.9907	69.0763	1.45216	1.52477	11.8652
[truncated: 47 more columns]

## Sheet: FEBRUARY PROPAGATION
FEBRUARY ERUPTION
FISSURE PROPAGATION OBSERVATIONS AND CAMERA NOTES									FISSURE PROPAGATION TIMES AND SPEEDS
Date	Time	Active Fissures	Notes about fissures	Notes about camera	Webcam				Fissure	Opening time	Propogation ends north	Propogation ends south	Propogation ends total	Propogation duration (time)	Propogation duration (s)	Fissure length	Propogation speed (m/s)	Propogation speed (m/min)
2024-02-08	06:02:03		start of eruption		mbl 2x				1a	06:32:59	06:39:15		06:39:15	00:06:16	376	167.5	0.445479	26.7287
2024-02-08	06:06:00	3	by the time the camera focuses, the whole of fissure 3 has propogated		lang				1b	06:31:15			06:31:15	00:00:00	0	51.6	#DIV/0!	#DIV/0!
2024-02-08	06:06:21	4a	fissure 4 a activates	I think this is actually the end of fissure 3?	lang				2	06:24:07			06:24:07	00:00:00	0	155.8	#DIV/0!	#DIV/0!
2024-02-08	06:06:31	4a	fissure 4a stops propogating		lang				3	06:02:03			06:02:03	00:00:00	0	1147.9	#DIV/0!	#DIV/0!
2024-02-08	06:06:41	4b	fissure 4b propogates		lang				4a	06:06:21	06:06:31		06:06:31	00:00:10	10	66.7	6.67	400.2
2024-02-08	06:06:50	4b	fissure 4b finishes propogating		lang				4b	06:06:41			06:06:41	00:00:00	0	75.4	#DIV/0!	#DIV/0!
2024-02-08	06:10:27	4a?	fissure initiated, behind little mound		ruv4				4c	06:17:23		06:19:54	06:19:54	00:02:31	151	89.1	0.590066	35.404
2024-02-08	06:16:39	4	small fissures in front have started		ruv4				4d	06:22:56	06:24:26	06:29:52	06:29:52	00:06:56	416	312.9	0.752163	45.1298
2024-02-08	06:17:23	4c	segment opened, slightly hidden behind hill		ruv4				4e	06:35:31	06:36:09		06:36:09	00:00:38	38	66	1.73684	104.211
2024-02-08	06:19:27	2	fissure 2 propogates? Really hard to see because the camera is so oblique to the fissures	hard to see	ruv4				4f	06:39:22			06:39:22	00:00:00	0	57.5	#DIV/0!	#DIV/0!
2024-02-08	06:19:54	4c	southern most extent reached		ruv4				5a	06:42:13			06:42:13	00:00:00	0	49.9	#DIV/0!	#DIV/0!
2024-02-08	06:22:56	4d	really segmented fissure segment opens somewhere in the middle		mbl1				5b	06:42:19	06:44:29	06:44:57	06:44:57	00:02:38	158	129.3	0.818354	49.1013
2024-02-08	06:24:07	2	part of fissure 2 opens, could be the northern segment because it looks like there is another fissure segment behind fissure 3	really hard to see because offset behind fissure 3	ruv4											2369.6
2024-02-08	06:24:26	4d	northermost bit reached		mbl1
2024-02-08	06:29:52	4d	southermost section reeached		mbl1
2024-02-08	06:31:15	1b	southern most fissure segement of fissure 1 opens, looks really tiny		ruv4
2024-02-08	06:32:59	1a	northernmost section of fissure 1 opens	far away and hard to see
2024-02-08	06:35:30	4	small behind fissures have opened, second one along is the first to start		ruv4
2024-02-08	06:35:31	4e	southern fissure segment opens, hard to tell which is the exact fissure		mbl1
2024-02-08	06:36:05	4	next fissure to the north opens		RUV4
2024-02-08	06:36:09	4e	northern section of 4c opens		mbl1
2024-02-08	06:36:17	4	next fissure south opens		ruv4
2024-02-08	06:39:15	1a	fissure 1a finishes propogating		ruv4
2024-02-08	06:39:17	5	northermost fissure 5 opens		ruv4
2024-02-08	06:39:22	4	southern most fissure 4 segment opens		ruv4
2024-02-08	06:41:01	5	southernmost fissure 5 opens, hard to see behind hill		ruv4
2024-02-08	06:41:35		gas plume emmitted showing initiation of fissure, fissure is quite displaced from the rest of fissure		mbl2x
2024-02-08	06:41:42	5b	gas plume showing start of fissure 5		mbl2x
2024-02-08	06:42:13	5a	fissure 5 starts propogating	hard to see how this fissure propogates because it is hidden behind a hill	mbl2x
2024-02-08	06:42:19	5b	first lava from fissure 5		mbl2x
2024-02-08	06:44:19	5b	fissure stops propogating to the south		mbl2x
2024-02-08	06:44:29	5b	fissure section stops propogating to the north		mbl2x
2024-02-08	06:44:57	5b	new fissure segment starts propogating from the north of the segment		mbl2x
2024-02-08	06:49:00	5b	fissure stops propogating to the south		mbl2x
	09:30:00	5	fissure 5 starts to die		lang
	09:50:00	4f	dead		lang
	10:16:00	4e	dead, been flickering for a while, pretty much dead after this		lang
	10:30:00	5	fissure 5 now appears to be dead, been flickering for a while so this is not an exact time		lang
	10:55:00	4d	4d now appears to be dead, flickering for a while so not an exact time	camera is really far away so don’t know for certain the time	lang
	11:18:41	1	fissure 1 is dead, maybe fissure 2 as well?		mbl1
	11:38:00	4	4a is dead		lang
	13:00:00			lang camera becomes useless, falls over and then zooms out oo far when recovered	lang
	13:00:00	3	fissure 3 is closing from the northern end to the south		mbl1
	13:33:00		black gas plume appears and remains for the rest of the hour		mbl1
	15:26:53	3	fissure 3 closes close to the north but still lots of degassing, the southernmost segment is still active		mbl1
	15:45:00	4b	fissure 4b closes, has been very weak for hours		mbl1
I have given up trying to map the closure of the fissures

## Sheet: MARCH FIRE FOUNTAINS 
MARCH ERUPTION
FISSURE PROPAGATION OBSERVATIONS AND CAMERA NOTES									FISSURE PROPAGATION TIMES AND SPEEDS													APPARENT FISSURE LENGTH BASED ON FISSURE ANGLE AND WEBCAM VIEW ANGLE											FIRE FOUNTAIN MEASUREMENTS FOR FISSURE SEGMENT 2
																																	Fissure 2
Date	Time	Active Fissures	Notes about fissures	Notes about camera	Webcam				Fissure	Opening time	Propogation ends (north)	Propogation ends (south)	Propogation ends	Propogation duration	Propogation duration (s)	Fissure length	Propogation speed (m/s)	Propogation speed (m/min)				fissure	webcam	webcam bearing	fissure bearing	real fissure length	e	g	apparent fissure length				Time	Time and date	Fissure	Fire fountain height on screen (m)	Fissure length on screen at time (m)	Total fissure length on screen (m)	Real apparent fissure length (m)	Scaling factor	Real fire fountain height (m)	Real fissure segment length (m)	Positive uncertainty	Negative uncertainty	Lower bound	Upper bound
2024-03-16	20:22:58	2c	eruption starts and fissure opens		lang																												20:27:19									0
2024-03-16	20:23:52	2b	fissure starts propogating in the middle		lang				2a	20:27:19	20:33:55		20:33:55	0.00458333	396	59.6	0.150505	9.0303				1c	lang	49.4	33.1	127.3	277.5	73.7	126.211				20:27:23	2024-03-16 20:27:23	2a	0.005	0.006	0.076	177.875	2340.45	11.7023	14.4789	2.31006	2.37166	9.39221	14.0739
2024-03-16	20:23:59	2c	fissure stops propogating to the north		lang				2b	20:23:52	20:26:54	20:24:12	20:26:54	0.00210648	182	70.3	0.386264	23.1758				2a	lang	49.5	26.4	183.4	284.1	66.9	177.875				20:27:27	2024-03-16 20:27:27	2a	0.007	0.01	0.076	177.875	2340.45	16.3832	24.1316	2.31006	2.37166	14.0731	18.7548
2024-03-16	20:24:08	2c	fissure stops propogating to the south		lang				2c	20:22:58	20:23:59	20:24:08	20:24:08	0.000810185	70	104.3	1.49	89.4				2b	lang	50.7	30.4	305.2	278.9	69.7	301.525				20:27:31	2024-03-16 20:27:31	2a	0.008	0.013	0.076	177.875	2340.45	18.7236	31.3711	2.31006	2.37166	16.4136	21.0953
2024-03-16	20:24:12	2b	fissure finishes propogating to the south		lang				2d	20:24:44		20:25:18	20:25:18	0.000393519	34	419.2	12.3294	739.765				2c	lang	52.2	27.9	284.3	279.9	65.7	280.067				20:27:41	2024-03-16 20:27:41	2a	0.01	0.022	0.076	177.875	2340.45	23.4045	53.0895	2.31006	2.37166	21.0945	25.7762
2024-03-16	20:24:44	2d	fissure opens in the north		lang				2e	20:26:04	20:26:16	20:29:42	20:29:42	0.00252315	218	966.4	4.43303	265.982				2d	lang	53.4	34.9	75.8	271.7	71.5	75.7666				20:27:59	2024-03-16 20:27:59	2a	0.012	0.028	0.076	177.875	2340.45	28.0855	67.5684	2.31006	2.37166	25.7754	30.4571
2024-03-16	20:25:18	2d	fissure stops propogating to the south		lang				2f	20:28:12	20:29:42	20:30:37	20:30:37	0.00167824	145	1442	9.94483	596.69				2e	lang	53.8	32.4	59.9	273.8	68.6	59.7683				20:28:10	2024-03-16 20:28:10	2a	0.013	0.034	0.076	177.875	2340.45	30.4259	82.0474	2.31006	2.37166	28.1158	32.7976
2024-03-16	20:26:04	2e	fissure 2e opens		lang				3a	20:32:46	20:33:34	20:37:56	20:37:56	0.00358796	310	786.7	2.53774	152.265				2f	lang	55.1	27.2	277.3	277.7	62.1	274.8				20:28:25	2024-03-16 20:28:25	2a	0.015	0.038	0.076	177.875	2340.45	35.1068	91.7	2.31006	2.37166	32.7968	37.4785
2024-03-16	20:26:16	2e	fissure stops propogating to the north	camera zoomed out and blurry	lang				3b	20:38:16			20:38:16	0	0	72.6						3a	lang	57.6	31.3	348.4	271.1	63.7	348.336				20:28:41	2024-03-16 20:28:41	2a	0.017	0.038	0.076	177.875	2340.45	39.7877	91.7	2.31006	2.37166	37.4777	42.1594
2024-03-16	20:26:54	2b	fissure stops propogating to the north		lang				3c	20:49:35	20:50:52		20:50:52	0.000891204	77	172.5	2.24026	134.416				3b	lang	60.1	22.4	206.9	277.5	52.3	205.13				20:29:03	2024-03-16 20:29:03	2a	0.018	0.048	0.076	177.875	2340.45	42.1282	115.832	2.31006	2.37166	39.8181	44.4998
2024-03-16	20:27:19	2a	fissure starts propogating from the south		lang				3d	20:52:14	21:01:47		21:01:47	0.00663194	573	107.1	0.186911	11.2147				3c	lang	62.2	29.9	133.8	267.9	57.7	133.71				20:29:36	2024-03-16 20:29:36	2a	0.018	0.049	0.076	177.875	2340.45	42.1282	118.245	2.31006	2.37166	39.8181	44.4998
2024-03-16	20:28:05	2e	fissure 2e finishes propogating to the south		lang				4	21:05:40	21:06:14	21:08:11	21:08:11	0.00174769	151	4200.7						3d	lang	65.3	13.8	261.3	280.9	38.5	256.586				20:30:01	2024-03-16 20:30:01	2a	0.018	0.05	0.076	177.875	2340.45	42.1282	120.658	2.31006	2.37166	39.8181	44.4998
2024-03-16	20:28:12	2f	fissure opens in 3 distinct segments		lang																	4	thorbjorn	69.8	1.6		68.2	21.8	0				20:30:34	2024-03-16 20:30:34	2a	0.018	0.052	0.076	177.875	2340.45	42.1282	125.484	2.31006	2.37166	39.8181	44.4998			zoom
2024-03-16	20:29:42	2f	fissure finishes propogating to the north		lang																												20:31:02	2024-03-16 20:31:02	2a	0.019	0.055	0.076	177.875	2340.45	44.4686	132.724	2.31006	2.37166	42.1586	46.8403			0.0956633
2024-03-16	20:30:37	2f	fissure stops propogating to the south		lang																												20:32:07	2024-03-16 20:32:07	2a	0.018	0.069	0.076	177.875	2340.45	42.1282	166.508	2.31006	2.37166	39.8181	44.4998
2024-03-16	20:32:46	3a	fissure starts propogating		lang																												20:32:59	2024-03-16 20:32:59	2a	0.019	0.07	0.076	177.875	2340.45	44.4686	168.921	2.31006	2.37166	42.1586	46.8403
2024-03-16	20:33:34	3a	fissure stops propogating to the north		lang																												20:34:05	2024-03-16 20:34:05	2a	0.022	0.076	0.076	177.875	2340.45	51.49	183.4	2.31006	2.37166	49.1799	53.8617
2024-03-16	20:33:55	2a	fissure 2a stops propogating to the north		lang																												20:35:05	2024-03-16 20:35:05	2a	0.017	0.059	0.059	177.875	3014.82	51.252	183.4	2.96458	3.0668	48.2874	54.3188
2024-03-16	20:34:02	1c	fissure 1 stops propogating to the south		lang																												20:36:10	2024-03-16 20:36:10	2a	0.018	0.059	0.059	177.875	3014.82	54.2668	183.4	2.96458	3.0668	51.3022	57.3336
2024-03-16	20:37:56	3a	fissure 3a stops propogating to the south		lang																												20:37:03	2024-03-16 20:37:03	2a	0.017	0.059	0.059	177.875	3014.82	51.252	183.4	2.96458	3.0668	48.2874	54.3188
2024-03-16	20:38:16	3b	fissure starts propogating to the north, camera angle means that we cant see when 3b finishes propogating		lang																												20:38:06	2024-03-16 20:38:06	2a	0.017	0.059	0.059	177.875	3014.82	51.252	183.4	2.96458	3.0668	48.2874	54.3188
2024-03-16	20:49:35	3c	fissure starts propogating		lang																												20:39:00	2024-03-16 20:39:00	2a	0.017	0.059	0.059	177.875	3014.82	51.252	183.4	2.96458	3.0668	48.2874	54.3188
2024-03-16	20:50:52	3c	fissure stops propogating to the south		lang																												20:40:07	2024-03-16 20:40:07	2a	0.017	0.059	0.059	177.875	3014.82	51.252	183.4	2.96458	3.0668	48.2874	54.3188
2024-03-16	20:52:14	3d	fissure starts propogating from the north		lang																												20:43:02	2024-03-16 20:43:02	2a	0.018	0.059	0.059	177.875	3014.82	54.2668	183.4	2.96458	3.0668	51.3022	57.3336
2024-03-16	21:01:47	3d	fissure stops propogating to the south		thorbjorn																												20:46:06	2024-03-16 20:46:06	2a	0.017	0.059	0.059	177.875	3014.82	51.252	183.4	2.96458	3.0668	48.2874	54.3188
2024-03-16	21:05:40	4	fissure 4 propogates		thorbjorn																												20:47:48	2024-03-16 20:47:48	2a	0.017	0.059	0.059	177.875	3014.82	51.252	183.4	2.96458	3.0668	48.2874	54.3188
2024-03-16	21:06:14	4	fissure stops propogating to the north		thorbjorn																												20:49:57	2024-03-16 20:49:57	2a	0.01	0.032	0.032	177.875	5558.58	55.5858	183.4	5.39014	5.73789	50.1957	61.3237
2024-03-16	21:08:11	4	finishes propogating to the south		thorbjorn																												20:55:04	2024-03-16 20:55:04	2a	0.009	0.032	0.032	177.875	5558.58	50.0272	183.4	5.39014	5.73789	44.6371	55.7651
																																	20:59:55	2024-03-16 20:59:55	2a	0.009	0.032	0.032	177.875	5558.58	50.0272	183.4	5.39014	5.73789	44.6371	55.7651
																																	21:00:06	2024-03-16 21:00:06	2a	0.009	0.032	0.032	177.875	5558.58	50.0272	183.4	5.39014	5.73789	44.6371	55.7651
																																	21:03:08	2024-03-16 21:03:08	2a	0.008	0.032	0.032	177.875	5558.58	44.4686	183.4	5.39014	5.73789	39.0785	50.2065
																																	21:06:10	2024-03-16 21:06:10	2a	0.008	0.032	0.032	177.875	5558.58	44.4686	183.4	5.39014	5.73789	39.0785	50.2065
																																	21:09:43	2024-03-16 21:09:43	2a	0.008	0.032	0.032	177.875	5558.58	44.4686	183.4	5.39014	5.73789	39.0785	50.2065
																																	21:15:06	2024-03-16 21:15:06	2a	0.008	0.032	0.032	177.875	5558.58	44.4686	183.4	5.39014	5.73789	39.0785	50.2065
																																	21:20:06	2024-03-16 21:20:06	2a	0.007	0.032	0.032	177.875	5558.58	38.9101	183.4	5.39014	5.73789	33.5199	44.6479
																																	21:25:08	2024-03-16 21:25:08	2a	0.007	0.032	0.032	177.875	5558.58	38.9101	183.4	5.39014	5.73789	33.5199	44.6479			0.0710345
																																	21:30:03	2024-03-16 21:30:03	2a	0.007	0.032	0.032	177.875	5558.58	38.9101	183.4	5.39014	5.73789	33.5199	44.6479
																																	21:35:08	2024-03-16 21:35:08	2a	0.007	0.032	0.032	177.875	5558.58	38.9101	183.4	5.39014	5.73789	33.5199	44.6479
																																	21:40:03	2024-03-16 21:40:03	2a	0.006	0.032	0.032	177.875	5558.58	33.3515	183.4	5.39014	5.73789	27.9613	39.0894
																																	21:45:07	2024-03-16 21:45:07	2a	0.006	0.032	0.032	177.875	5558.58	33.3515	183.4	5.39014	5.73789	27.9613	39.0894
																																	21:50:00	2024-03-16 21:50:00	2a	0.005	0.032	0.032	177.875	5558.58	27.7929	183.4	5.39014	5.73789	22.4028	33.5308
																																	21:55:04	2024-03-16 21:55:04	2a	0.004	0.032	0.032	177.875	5558.58	22.2343	183.4	5.39014	5.73789	16.8442	27.9722
																																	22:00:07	2024-03-16 22:00:07	2a	0.004	0.032	0.032	177.875	5558.58	22.2343	183.4	5.39014	5.73789	16.8442	27.9722
																																	22:05:09	2024-03-16 22:05:09	2a	0.004	0.032	0.032	177.875	5558.58	22.2343	183.4	5.39014	5.73789	16.8442	27.9722
																																	22:10:02	2024-03-16 22:10:02	2a	0.004	0.032	0.032	177.875	5558.58	22.2343	183.4	5.39014	5.73789	16.8442	27.9722
																																	22:15:03	2024-03-16 22:15:03	2a	0.004	0.032	0.032	177.875	5558.58	22.2343	183.4	5.39014	5.73789	16.8442	27.9722
																																	22:20:06	2024-03-16 22:20:06	2a	0.004	0.032	0.032	177.875	5558.58	22.2343	183.4	5.39014	5.73789	16.8442	27.9722
																																	22:25:04	2024-03-16 22:25:04	2a	0.004	0.032	0.032	177.875	5558.58	22.2343	183.4	5.39014	5.73789	16.8442	27.9722
																																	22:30:07	2024-03-16 22:30:07	2a	0.004	0.032	0.032	177.875	5558.58	22.2343	183.4	5.39014	5.73789	16.8442	27.9722
																																	22:35:01	2024-03-16 22:35:01	2a	0.004	0.032	0.032	177.875	5558.58	22.2343	183.4	5.39014	5.73789	16.8442	27.9722
																																	22:40:05	2024-03-16 22:40:05	2a	0.004	0.032	0.032	177.875	5558.58	22.2343	183.4	5.39014	5.73789	16.8442	27.9722
																																	22:45:06	2024-03-16 22:45:06	2a	0.004	0.032	0.032	177.875	5558.58	22.2343	183.4	5.39014	5.73789	16.8442	27.9722
																																	22:50:07	2024-03-16 22:50:07	2a	0.004	0.032	0.032	177.875	5558.58	22.2343	183.4	5.39014	5.73789	16.8442	27.9722
																																	22:55:02	2024-03-16 22:55:02	2a	0.004	0.032	0.032	177.875	5558.58	22.2343	183.4	5.39014	5.73789	16.8442	27.9722
																																	23:00:03	2024-03-16 23:00:03	2a	0.004	0.032	0.032	177.875	5558.58	22.2343	183.4	5.39014	5.73789	16.8442	27.9722
																																	23:05:04	2024-03-16 23:05:04	2a	0.003	0.032	0.032	177.875	5558.58	16.6757	183.4	5.39014	5.73789	11.2856	22.4136
																																	23:10:03	2024-03-16 23:10:03	2a	0.003	0.032	0.032	177.875	5558.58	16.6757	183.4	5.39014	5.73789	11.2856	22.4136
																																	20:23:52									0
																																	20:23:53	2024-03-16 20:23:53	2b	0.003	0.007	0.071	301.525	4246.84	12.7405	30.6513	4.18785	4.30751	8.55266	17.048
																																	20:23:57	2024-03-16 20:23:57	2b	0.007	0.008	0.071	301.525	4246.84	29.7279	35.0301	4.18785	4.30751	25.54	34.0354
																																	20:24:00	2024-03-16 20:24:00	2b	0.014	0.021	0.071	301.525	4246.84	59.4557	91.9539	4.18785	4.30751	55.2679	63.7632
																																	20:24:06	2024-03-16 20:24:06	2b	0.016	0.025	0.071	301.525	4246.84	67.9494	109.469	4.18785	4.30751	63.7615	72.2569			1.35385
																																	20:24:12	2024-03-16 20:24:12	2b	0.017	0.026	0.071	301.525	4246.84	72.1962	113.848	4.18785	4.30751	68.0084	76.5037			1.55556
																																	20:24:18	2024-03-16 20:24:18	2b	0.017	0.035	0.071	301.525	4246.84	72.1962	153.257	4.18785	4.30751	68.0084	76.5037			2.9094
																																	20:24:25	2024-03-16 20:24:25	2b	0.018	0.04	0.071	301.525	4246.84	76.443	175.15	4.18785	4.30751	72.2552	80.7506			1.4547
																																	20:24:32	2024-03-16 20:24:32	2b	0.018	0.042	0.071	301.525	4246.84	76.443	183.908	4.18785	4.30751	72.2552	80.7506			zoom
																																	20:24:40	2024-03-16 20:24:40	2b	0.019	0.044	0.071	301.525	4246.84	80.6899	192.665	4.18785	4.30751	76.502	84.9974
																																	20:24:50	2024-03-16 20:24:50	2b	0.017	0.048	0.071	301.525	4246.84	72.1962	210.18	4.18785	4.30751	68.0084	76.5037
																																	20:24:59	2024-03-16 20:24:59	2b	0.019	0.05	0.071	301.525	4246.84	80.6899	218.938	4.18785	4.30751	76.502	84.9974	0.56
																																	20:25:05	2024-03-16 20:25:05	2b	0.024	0.05	0.071	301.525	4246.84	101.924	218.938	4.18785	4.30751	97.7362	106.232	0.0535714
																																	20:25:19	2024-03-16 20:25:19	2b	0.019	0.054	0.071	301.525	4246.84	80.6899	236.453	4.18785	4.30751	76.502	84.9974
																																	20:25:27	2024-03-16 20:25:27	2b	0.021	0.054	0.071	301.525	4246.84	89.1836	236.453	4.18785	4.30751	84.9957	93.4911
																													0.815534				20:25:37	2024-03-16 20:25:37	2b	0.02	0.056	0.071	301.525	4246.84	84.9367	245.211	4.18785	4.30751	80.7489	89.2442
																																	20:25:45	2024-03-16 20:25:45	2b	0.019	0.057	0.071	301.525	4246.84	80.6899	249.589	4.18785	4.30751	76.502	84.9974
																																	20:26:02	2024-03-16 20:26:02	2b	0.02	0.06	0.071	301.525	4246.84	84.9367	262.726	4.18785	4.30751	80.7489	89.2442
																																	20:26:02	2024-03-16 20:26:02	2b	0.021	0.06	0.071	301.525	4246.84	89.1836	262.726	4.18785	4.30751	84.9957	93.4911
																																	20:26:12	2024-03-16 20:26:12	2b	0.019	0.06	0.071	301.525	4246.84	80.6899	262.726	4.18785	4.30751	76.502	84.9974
																																	20:26:26	2024-03-16 20:26:26	2b	0.02	0.061	0.071	301.525	4246.84	84.9367	267.104	4.18785	4.30751	80.7489	89.2442
																																	20:26:38	2024-03-16 20:26:38	2b	0.02	0.068	0.071	301.525	4246.84	84.9367	297.756	4.18785	4.30751	80.7489	89.2442
																																	20:26:48	2024-03-16 20:26:48	2b	0.027	0.103	0.103	301.525	2927.43	79.0406	310.892	2.89928	2.95613	76.1413	81.9968
																																	20:27:05	2024-03-16 20:27:05	2b	0.024	0.103	0.103	301.525	2927.43	70.2583	310.892	2.89928	2.95613	67.3591	73.2145
																																	20:27:23	2024-03-16 20:27:23	2b	0.027	0.103	0.103	301.525	2927.43	79.0406	310.892	2.89928	2.95613	76.1413	81.9968
																																	20:27:41	2024-03-16 20:27:41	2b	0.025	0.103	0.103	301.525	2927.43	73.1858	310.892	2.89928	2.95613	70.2865	76.1419
																																	20:27:59	2024-03-16 20:27:59	2b	0.024	0.103	0.103	301.525	2927.43	70.2583	310.892	2.89928	2.95613	67.3591	73.2145
																																	20:28:10	2024-03-16 20:28:10	2b	0.026	0.103	0.103	301.525	2927.43	76.1132	310.892	2.89928	2.95613	73.2139	79.0693
																																	20:28:25	2024-03-16 20:28:25	2b	0.025	0.103	0.103	301.525	2927.43	73.1858	310.892	2.89928	2.95613	70.2865	76.1419
																																	20:28:41	2024-03-16 20:28:41	2b	0.029	0.103	0.103	301.525	2927.43	84.8955	310.892	2.89928	2.95613	81.9962	87.8516
																																	20:29:03	2024-03-16 20:29:03	2b	0.027	0.103	0.103	301.525	2927.43	79.0406	310.892	2.89928	2.95613	76.1413	81.9968
																																	20:29:36	2024-03-16 20:29:36	2b	0.026	0.103	0.103	301.525	2927.43	76.1132	310.892	2.89928	2.95613	73.2139	79.0693
																																	20:30:01	2024-03-16 20:30:01	2b	0.025	0.103	0.103	301.525	2927.43	73.1858	310.892	2.89928	2.95613	70.2865	76.1419
																																	20:30:34	2024-03-16 20:30:34	2b	0.024	0.103	0.103	301.525	2927.43	70.2583	310.892	2.89928	2.95613	67.3591	73.2145
																																	20:31:02	2024-03-16 20:31:02	2b	0.024	0.103	0.103	301.525	2927.43	70.2583	310.892	2.89928	2.95613	67.3591	73.2145
																																	20:32:07	2024-03-16 20:32:07	2b	0.03	0.103	0.103	301.525	2927.43	87.8229	310.892	2.89928	2.95613	84.9236	90.779
																																	20:32:59	2024-03-16 20:32:59	2b	0.025	0.103	0.103	301.525	2927.43	73.1858	310.892	2.89928	2.95613	70.2865	76.1419
																																	20:34:05	2024-03-16 20:34:05	2b	0.022	0.103	0.103	301.525	2927.43	64.4035	310.892	2.89928	2.95613	61.5042	67.3596
																																	20:35:05	2024-03-16 20:35:05	2b	0.019	0.084	0.084	301.525	3589.59	68.2022	310.892	3.54736	3.63284	64.6548	71.835
																																	20:36:10	2024-03-16 20:36:10	2b	0.018	0.084	0.084	301.525	3589.59	64.6126	310.892	3.54736	3.63284	61.0652	68.2454
																																	20:37:03	2024-03-16 20:37:03	2b	0.019	0.084	0.084	301.525	3589.59	68.2022	310.892	3.54736	3.63284	64.6548	71.835
																																	20:38:06	2024-03-16 20:38:06	2b	0.017	0.084	0.084	301.525	3589.59	61.023	310.892	3.54736	3.63284	57.4756	64.6558
																																	20:39:00	2024-03-16 20:39:00	2b	0.018	0.084	0.084	301.525	3589.59	64.6126	310.892	3.54736	3.63284	61.0652	68.2454
																																	20:40:07	2024-03-16 20:40:07	2b	0.018	0.084	0.084	301.525	3589.59	64.6126	310.892	3.54736	3.63284	61.0652	68.2454
																																	20:43:02	2024-03-16 20:43:02	2b	0.017	0.084	0.084	301.525	3589.59	61.023	310.892	3.54736	3.63284	57.4756	64.6558
																																	20:46:06	2024-03-16 20:46:06	2b	0.015	0.084	0.084	301.525	3589.59	53.8438	310.892	3.54736	3.63284	50.2965	57.4766
																																	20:47:48	2024-03-16 20:47:48	2b	0.017	0.084	0.084	301.525	3589.59	61.023	310.892	3.54736	3.63284	57.4756	64.6558
																																	20:49:57	2024-03-16 20:49:57	2b	0.009	0.047	0.047	301.525	6415.43	57.7389	310.892	6.28178	6.5549	51.4571	64.2938
																																	20:55:04	2024-03-16 20:55:04	2b	0.008	0.047	0.047	301.525	6415.43	51.3235	310.892	6.28178	6.5549	45.0417	57.8784
																																	20:59:55	2024-03-16 20:59:55	2b	0.006	0.047	0.047	301.525	6415.43	38.4926	310.892	6.28178	6.5549	32.2108	45.0475
																																	21:00:06	2024-03-16 21:00:06	2b	0.008	0.047	0.047	301.525	6415.43	51.3235	310.892	6.28178	6.5549	45.0417	57.8784
																																	21:03:08	2024-03-16 21:03:08	2b	0.007	0.047	0.047	301.525	6415.43	44.908	310.892	6.28178	6.5549	38.6263	51.4629
																																	21:06:10	2024-03-16 21:06:10	2b	0.009	0.047	0.047	301.525	6415.43	57.7389	310.892	6.28178	6.5549	51.4571	64.2938
																																	21:09:43	2024-03-16 21:09:43	2b	0.007	0.047	0.047	301.525	6415.43	44.908	310.892	6.28178	6.5549	38.6263	51.4629
																																	21:15:06	2024-03-16 21:15:06	2b	0.007	0.047	0.047	301.525	6415.43	44.908	310.892	6.28178	6.5549	38.6263	51.4629
																																	21:20:06	2024-03-16 21:20:06	2b	0.007	0.047	0.047	301.525	6415.43	44.908	310.892	6.28178	6.5549	38.6263	51.4629
																																	21:25:08	2024-03-16 21:25:08	2b	0.007	0.047	0.047	301.525	6415.43	44.908	310.892	6.28178	6.5549	38.6263	51.4629
																																	21:30:03	2024-03-16 21:30:03	2b	0.007	0.047	0.047	301.525	6415.43	44.908	310.892	6.28178	6.5549	38.6263	51.4629
																																	21:35:08	2024-03-16 21:35:08	2b	0.007	0.047	0.047	301.525	6415.43	44.908	310.892	6.28178	6.5549	38.6263	51.4629
																																	21:40:03	2024-03-16 21:40:03	2b	0.006	0.047	0.047	301.525	6415.43	38.4926	310.892	6.28178	6.5549	32.2108	45.0475
																																	21:45:07	2024-03-16 21:45:07	2b	0.006	0.047	0.047	301.525	6415.43	38.4926	310.892	6.28178	6.5549	32.2108	45.0475
																																	21:50:00	2024-03-16 21:50:00	2b	0.006	0.047	0.047	301.525	6415.43	38.4926	310.892	6.28178	6.5549	32.2108	45.0475
																													1.5769				21:55:04	2024-03-16 21:55:04	2b	0.006	0.047	0.047	301.525	6415.43	38.4926	310.892	6.28178	6.5549	32.2108	45.0475
																													0.525633				22:00:07	2024-03-16 22:00:07	2b	0.004	0.047	0.047	301.525	6415.43	25.6617	310.892	6.28178	6.5549	19.38	32.2166
																																	22:05:09	2024-03-16 22:05:09	2b	0.006	0.047	0.047	301.525	6415.43	38.4926	310.892	6.28178	6.5549	32.2108	45.0475
																																	22:10:02	2024-03-16 22:10:02	2b	0.005	0.047	0.047	301.525	6415.43	32.0772	310.892	6.28178	6.5549	25.7954	38.6321
																																	22:15:03	2024-03-16 22:15:03	2b	0.005	0.047	0.047	301.525	6415.43	32.0772	310.892	6.28178	6.5549	25.7954	38.6321
																																	22:20:06	2024-03-16 22:20:06	2b	0.005	0.047	0.047	301.525	6415.43	32.0772	310.892	6.28178	6.5549	25.7954	38.6321			0.0262069
																																	22:25:04	2024-03-16 22:25:04	2b	0.004	0.047	0.047	301.525	6415.43	25.6617	310.892	6.28178	6.5549	19.38	32.2166
																																	22:30:07	2024-03-16 22:30:07	2b	0.005	0.047	0.047	301.525	6415.43	32.0772	310.892	6.28178	6.5549	25.7954	38.6321
																																	22:35:01	2024-03-16 22:35:01	2b	0.005	0.047	0.047	301.525	6415.43	32.0772	310.892	6.28178	6.5549	25.7954	38.6321
																																	22:40:05	2024-03-16 22:40:05	2b	0.004	0.047	0.047	301.525	6415.43	25.6617	310.892	6.28178	6.5549	19.38	32.2166
																																	22:45:06	2024-03-16 22:45:06	2b	0.005	0.047	0.047	301.525	6415.43	32.0772	310.892	6.28178	6.5549	25.7954	38.6321
																																	22:50:07	2024-03-16 22:50:07	2b	0.004	0.047	0.047	301.525	6415.43	25.6617	310.892	6.28178	6.5549	19.38	32.2166
																													0.761364				22:55:02	2024-03-16 22:55:02	2b	0.004	0.047	0.047	301.525	6415.43	25.6617	310.892	6.28178	6.5549	19.38	32.2166
																																	23:00:05	2024-03-16 23:00:05	2b	0.005	0.047	0.047	301.525	6415.43	32.0772	310.892	6.28178	6.5549	25.7954	38.6321
																																	23:05:04	2024-03-16 23:05:04	2b	0.005	0.047	0.047	301.525	6415.43	32.0772	310.892	6.28178	6.5549	25.7954	38.6321
																																	23:10:03	2024-03-16 23:10:03	2b	0.004	0.047	0.047	301.525	6415.43	25.6617	310.892	6.28178	6.5549	19.38	32.2166
																																	20:22:58									0
																																										0
																																	20:22:59	2024-03-16 20:22:59	2c	0.004	0.01	0.065	280.067	4308.72	17.2349	44.4256	4.24343	4.37604	12.9914	21.6109
																																	20:23:02	2024-03-16 20:23:02	2c	0.007	0.015	0.065	280.067	4308.72	30.161	66.6384	4.24343	4.37604	25.9176	34.5371			0.0234483
																																	20:23:05	2024-03-16 20:23:05	2c	0.008	0.023	0.065	280.067	4308.72	34.4697	102.179	4.24343	4.37604	30.2263	38.8458
																																	20:23:11	2024-03-16 20:23:11	2c	0.013	0.028	0.065	280.067	4308.72	56.0133	124.392	4.24343	4.37604	51.7699	60.3894
																																	20:23:17	2024-03-16 20:23:17	2c	0.015	0.037	0.065	280.067	4308.72	64.6307	164.375	4.24343	4.37604	60.3873	69.0068
																																	20:23:24	2024-03-16 20:23:24	2c	0.017	0.043	0.065	280.067	4308.72	73.2482	191.03	4.24343	4.37604	69.0047	77.6242
																																	20:23:34	2024-03-16 20:23:34	2c	0.017	0.046	0.065	280.067	4308.72	73.2482	204.358	4.24343	4.37604	69.0047	77.6242
																																	20:23:43	2024-03-16 20:23:43	2c	0.02	0.053	0.065	280.067	4308.72	86.1743	235.456	4.24343	4.37604	81.9309	90.5504
																																	20:23:51	2024-03-16 20:23:51	2c	0.021	0.057	0.065	280.067	4308.72	90.483	253.226	4.24343	4.37604	86.2396	94.8591
																																	20:23:57	2024-03-16 20:23:57	2c	0.021	0.06	0.065	280.067	4308.72	90.483	266.554	4.24343	4.37604	86.2396	94.8591
																																	20:24:00	2024-03-16 20:24:00	2c	0.022	0.064	0.065	280.067	4308.72	94.7918	284.324	4.24343	4.37604	90.5483	99.1678
																																	20:24:06	2024-03-16 20:24:06	2c	0.023	0.065	0.065	280.067	4308.72	99.1005	288.767	4.24343	4.37604	94.857	103.477
																																	20:24:12	2024-03-16 20:24:12	2c	0.023	0.065	0.065	280.067	4308.72	99.1005	288.767	4.24343	4.37604	94.857	103.477
																																	20:24:18	2024-03-16 20:24:18	2c	0.023	0.065	0.065	280.067	4308.72	99.1005	288.767	4.24343	4.37604	94.857	103.477
																																	20:24:25	2024-03-16 20:24:25	2c	0.021	0.065	0.065	280.067	4308.72	90.483	288.767	4.24343	4.37604	86.2396	94.8591
																																	20:24:32	2024-03-16 20:24:32	2c	0.022	0.065	0.065	280.067	4308.72	94.7918	288.767	4.24343	4.37604	90.5483	99.1678
																																	20:24:40	2024-03-16 20:24:40	2c	0.025	0.065	0.065	280.067	4308.72	107.718	288.767	4.24343	4.37604	103.474	112.094
																																	20:24:50	2024-03-16 20:24:50	2c	0.023	0.065	0.065	280.067	4308.72	99.1005	288.767	4.24343	4.37604	94.857	103.477
																																	20:24:59	2024-03-16 20:24:59	2c	0.022	0.065	0.065	280.067	4308.72	94.7918	288.767	4.24343	4.37604	90.5483	99.1678
																																	20:35:05	2024-03-16 20:35:05	2c	0.022	0.065	0.065	280.067	4308.72	94.7918	288.767	4.24343	4.37604	90.5483	99.1678
																																	20:25:19	2024-03-16 20:25:19	2c	0.023	0.065	0.065	280.067	4308.72	99.1005	288.767	4.24343	4.37604	94.857	103.477
																																	20:25:27	2024-03-16 20:25:27	2c	0.022	0.065	0.065	280.067	4308.72	94.7918	288.767	4.24343	4.37604	90.5483	99.1678
																																	20:25:37	2024-03-16 20:25:37	2c	0.019	0.065	0.065	280.067	4308.72	81.8656	288.767	4.24343	4.37604	77.6222	86.2417
																																	20:25:45	2024-03-16 20:25:45	2c	0.02	0.065	0.065	280.067	4308.72	86.1743	288.767	4.24343	4.37604	81.9309	90.5504
																																	20:25:54	2024-03-16 20:25:54	2c	0.021	0.065	0.065	280.067	4308.72	90.483	288.767	4.24343	4.37604	86.2396	94.8591
																																	20:26:02	2024-03-16 20:26:02	2c	0.023	0.065	0.065	280.067	4308.72	99.1005	288.767	4.24343	4.37604	94.857	103.477
																																	20:26:12	2024-03-16 20:26:12	2c	0.021	0.065	0.065	280.067	4308.72	90.483	288.767	4.24343	4.37604	86.2396	94.8591
																																	20:26:26	2024-03-16 20:26:26	2c	0.022	0.065	0.065	280.067	4308.72	94.7918	288.767	4.24343	4.37604	90.5483	99.1678
																																	20:26:38	2024-03-16 20:26:38	2c	0.02	0.065	0.065	280.067	4308.72	86.1743	288.767	4.24343	4.37604	81.9309	90.5504
																																	20:26:48	2024-03-16 20:26:48	2c	0.027	0.088	0.088	280.067	3182.57	85.9295	288.767	3.14682	3.21916	82.7827	89.1487
																																	20:27:05	2024-03-16 20:27:05	2c	0.029	0.088	0.088	280.067	3182.57	92.2947	288.767	3.14682	3.21916	89.1479	95.5138
																																	20:27:23	2024-03-16 20:27:23	2c	0.028	0.088	0.088	280.067	3182.57	89.1121	288.767	3.14682	3.21916	85.9653	92.3313
																																	20:27:41	2024-03-16 20:27:41	2c	0.029	0.088	0.088	280.067	3182.57	92.2947	288.767	3.14682	3.21916	89.1479	95.5138
																																	20:27:59	2024-03-16 20:27:59	2c	0.029	0.088	0.088	280.067	3182.57	92.2947	288.767	3.14682	3.21916	89.1479	95.5138
																																	20:28:10	2024-03-16 20:28:10	2c	0.031	0.088	0.088	280.067	3182.57	98.6598	288.767	3.14682	3.21916	95.513	101.879
																																	20:28:25	2024-03-16 20:28:25	2c	0.029	0.088	0.088	280.067	3182.57	92.2947	288.767	3.14682	3.21916	89.1479	95.5138
																																	20:28:41	2024-03-16 20:28:41	2c	0.032	0.088	0.088	280.067	3182.57	101.842	288.767	3.14682	3.21916	98.6956	105.062
																																	20:29:03	2024-03-16 20:29:03	2c	0.032	0.088	0.088	280.067	3182.57	101.842	288.767	3.14682	3.21916	98.6956	105.062
																																	20:29:36	2024-03-16 20:29:36	2c	0.033	0.088	0.088	280.067	3182.57	105.025	288.767	3.14682	3.21916	101.878	108.244
																																	20:30:01	2024-03-16 20:30:01	2c	0.032	0.088	0.088	280.067	3182.57	101.842	288.767	3.14682	3.21916	98.6956	105.062
																																	20:30:34	2024-03-16 20:30:34	2c	0.03	0.088	0.088	280.067	3182.57	95.4772	288.767	3.14682	3.21916	92.3304	98.6964
																																	20:31:02	2024-03-16 20:31:02	2c	0.032	0.088	0.088	280.067	3182.57	101.842	288.767	3.14682	3.21916	98.6956	105.062
																																	20:32:07	2024-03-16 20:32:07	2c	0.03	0.088	0.088	280.067	3182.57	95.4772	288.767	3.14682	3.21916	92.3304	98.6964
																																	20:32:59	2024-03-16 20:32:59	2c	0.039	0.088	0.088	280.067	3182.57	124.12	288.767	3.14682	3.21916	120.974	127.34
																																	20:34:05	2024-03-16 20:34:05	2c	0.03	0.088	0.088	280.067	3182.57	95.4772	288.767	3.14682	3.21916	92.3304	98.6964
																																	20:35:05	2024-03-16 20:35:05	2c	0.025	0.067	0.067	280.067	4180.1	104.502	288.767	4.11863	4.24343	100.384	108.746
																																	20:36:10	2024-03-16 20:36:10	2c	0.022	0.067	0.067	280.067	4180.1	91.9622	288.767	4.11863	4.24343	87.8435	96.2056
																																	20:37:03	2024-03-16 20:37:03	2c	0.025	0.067	0.067	280.067	4180.1	104.502	288.767	4.11863	4.24343	100.384	108.746
																																	20:38:06	2024-03-16 20:38:06	2c	0.026	0.067	0.067	280.067	4180.1	108.683	288.767	4.11863	4.24343	104.564	112.926
																																	20:39:00	2024-03-16 20:39:00	2c	0.025	0.067	0.067	280.067	4180.1	104.502	288.767	4.11863	4.24343	100.384	108.746
																																	20:40:07	2024-03-16 20:40:07	2c	0.022	0.067	0.067	280.067	4180.1	91.9622	288.767	4.11863	4.24343	87.8435	96.2056
																																	20:43:02	2024-03-16 20:43:02	2c	0.024	0.067	0.067	280.067	4180.1	100.322	288.767	4.11863	4.24343	96.2037	104.566
																																	20:46:06	2024-03-16 20:46:06	2c	0.02	0.067	0.067	280.067	4180.1	83.602	288.767	4.11863	4.24343	79.4833	87.8454
																																	20:47:48	2024-03-16 20:47:48	2c	0.023	0.067	0.067	280.067	4180.1	96.1423	288.767	4.11863	4.24343	92.0236	100.386
																																	20:49:57	2024-03-16 20:49:57	2c	0.014	0.038	0.038	280.067	7370.17	103.182	288.767	7.18119	7.56937	96.0012	110.752
																																	20:55:04	2024-03-16 20:55:04	2c	0.012	0.038	0.038	280.067	7370.17	88.4421	288.767	7.18119	7.56937	81.2609	96.0114
																																	20:59:55	2024-03-16 20:59:55	2c	0.011	0.038	0.038	280.067	7370.17	81.0719	288.767	7.18119	7.56937	73.8907	88.6413
																																	21:00:06	2024-03-16 21:00:06	2c	0.01	0.038	0.038	280.067	7370.17	73.7017	288.767	7.18119	7.56937	66.5205	81.2711
																																	21:03:08	2024-03-16 21:03:08	2c	0.009	0.038	0.038	280.067	7370.17	66.3316	288.767	7.18119	7.56937	59.1504	73.9009
																																	21:06:10	2024-03-16 21:06:10	2c	0.011	0.038	0.038	280.067	7370.17	81.0719	288.767	7.18119	7.56937	73.8907	88.6413
																																	21:09:43	2024-03-16 21:09:43	2c	0.009	0.038	0.038	280.067	7370.17	66.3316	288.767	7.18119	7.56937	59.1504	73.9009
																																	21:15:06	2024-03-16 21:15:06	2c	0.009	0.038	0.038	280.067	7370.17	66.3316	288.767	7.18119	7.56937	59.1504	73.9009
																																	21:20:06	2024-03-16 21:20:06	2c	0.008	0.038	0.038	280.067	7370.17	58.9614	288.767	7.18119	7.56937	51.7802	66.5308
																																	21:25:08	2024-03-16 21:25:08	2c	0.008	0.038	0.038	280.067	7370.17	58.9614	288.767	7.18119	7.56937	51.7802	66.5308
																																	21:30:03	2024-03-16 21:30:03	2c	0.01	0.038	0.038	280.067	7370.17	73.7017	288.767	7.18119	7.56937	66.5205	81.2711
																																	21:35:08	2024-03-16 21:35:08	2c	0.008	0.038	0.038	280.067	7370.17	58.9614	288.767	7.18119	7.56937	51.7802	66.5308
																																	21:40:03	2024-03-16 21:40:03	2c	0.007	0.038	0.038	280.067	7370.17	51.5912	288.767	7.18119	7.56937	44.41	59.1606
																																	21:45:07	2024-03-16 21:45:07	2c	0.006	0.038	0.038	280.067	7370.17	44.221	288.767	7.18119	7.56937	37.0398	51.7904
																																	21:50:00	2024-03-16 21:50:00	2c	0.007	0.038	0.038	280.067	7370.17	51.5912	288.767	7.18119	7.56937	44.41	59.1606
																																	21:55:04	2024-03-16 21:55:04	2c	0.007	0.038	0.038	280.067	7370.17	51.5912	288.767	7.18119	7.56937	44.41	59.1606
																																	22:00:07	2024-03-16 22:00:07	2c	0.006	0.038	0.038	280.067	7370.17	44.221	288.767	7.18119	7.56937	37.0398	51.7904
																																	22:05:09	2024-03-16 22:05:09	2c	0.006	0.038	0.038	280.067	7370.17	44.221	288.767	7.18119	7.56937	37.0398	51.7904
																																	22:10:02	2024-03-16 22:10:02	2c	0.005	0.038	0.038	280.067	7370.17	36.8509	288.767	7.18119	7.56937	29.6697	44.4202
																																	22:15:03	2024-03-16 22:15:03	2c	0.006	0.038	0.038	280.067	7370.17	44.221	288.767	7.18119	7.56937	37.0398	51.7904
																																	22:20:06	2024-03-16 22:20:06	2c	0.005	0.038	0.038	280.067	7370.17	36.8509	288.767	7.18119	7.56937	29.6697	44.4202
																																	22:25:04	2024-03-16 22:25:04	2c	0.006	0.038	0.038	280.067	7370.17	44.221	288.767	7.18119	7.56937	37.0398	51.7904
																																	22:30:07	2024-03-16 22:30:07	2c	0.005	0.038	0.038	280.067	7370.17	36.8509	288.767	7.18119	7.56937	29.6697	44.4202
																																	22:35:01	2024-03-16 22:35:01	2c	0.006	0.038	0.038	280.067	7370.17	44.221	288.767	7.18119	7.56937	37.0398	51.7904
																																	22:40:05	2024-03-16 22:40:05	2c	0.005	0.038	0.038	280.067	7370.17	36.8509	288.767	7.18119	7.56937	29.6697	44.4202
																																	22:45:06	2024-03-16 22:45:06	2c	0.005	0.038	0.038	280.067	7370.17	36.8509	288.767	7.18119	7.56937	29.6697	44.4202
																																	22:50:07	2024-03-16 22:50:07	2c	0.005	0.038	0.038	280.067	7370.17	36.8509	288.767	7.18119	7.56937	29.6697	44.4202
																																	22:55:02	2024-03-16 22:55:02	2c	0.005	0.038	0.038	280.067	7370.17	36.8509	288.767	7.18119	7.56937	29.6697	44.4202
																																	23:00:03	2024-03-16 23:00:03	2c	0.004	0.038	0.038	280.067	7370.17	29.4807	288.767	7.18119	7.56937	22.2995	37.0501
																																	23:05:04	2024-03-16 23:05:04	2c	0.005	0.038	0.038	280.067	7370.17	36.8509	288.767	7.18119	7.56937	29.6697	44.4202
																																	23:10:03	2024-03-16 23:10:03	2c	0.003	0.038	0.038	280.067	7370.17	22.1105	288.767	7.18119	7.56937	14.9293	29.6799
																																	20:24:44									0
																																	20:24:48	2024-03-16 20:24:48	2d	0.006	0.006	0.018	75.7666	4209.26	25.2555	26.0401	3.98772	4.45686	21.2678	29.7124
																																	20:24:59	2024-03-16 20:24:59	2d	0.005	0.012	0.018	75.7666	4209.26	21.0463	52.0802	3.98772	4.45686	17.0586	25.5031
																																	20:25:05	2024-03-16 20:25:05	2d	0.007	0.012	0.018	75.7666	4209.26	29.4648	52.0802	3.98772	4.45686	25.4771	33.9217
																																	20:25:19	2024-03-16 20:25:19	2d	0.007	0.017	0.018	75.7666	4209.26	29.4648	73.7802	3.98772	4.45686	25.4771	33.9217
																																	20:25:27	2024-03-16 20:25:27	2d	0.009	0.018	0.018	75.7666	4209.26	37.8833	78.1202	3.98772	4.45686	33.8956	42.3402
																																	20:25:37	2024-03-16 20:25:37	2d	0.009	0.018	0.018	75.7666	4209.26	37.8833	78.1202	3.98772	4.45686	33.8956	42.3402
																																	20:25:45	2024-03-16 20:25:45	2d	0.009	0.018	0.018	75.7666	4209.26	37.8833	78.1202	3.98772	4.45686	33.8956	42.3402
																																	20:25:54	2024-03-16 20:25:54	2d	0.009	0.018	0.018	75.7666	4209.26	37.8833	78.1202	3.98772	4.45686	33.8956	42.3402
																																	20:26:02	2024-03-16 20:26:02	2d	0.009	0.018	0.018	75.7666	4209.26	37.8833	78.1202	3.98772	4.45686	33.8956	42.3402
																																	20:26:12	2024-03-16 20:26:12	2d	0.009	0.018	0.018	75.7666	4209.26	37.8833	78.1202	3.98772	4.45686	33.8956	42.3402
																																	20:26:26	2024-03-16 20:26:26	2d	0.012	0.018	0.018	75.7666	4209.26	50.5111	78.1202	3.98772	4.45686	46.5234	54.968
																																	20:26:38	2024-03-16 20:26:38	2d	0.011	0.018	0.018	75.7666	4209.26	46.3018	78.1202	3.98772	4.45686	42.3141	50.7587
																																	20:26:48	2024-03-16 20:26:48	2d	0.018	0.028	0.028	75.7666	2705.95	48.7071	78.1202	2.61264	2.80617	46.0945	51.5133
																																	20:27:05	2024-03-16 20:27:05	2d	0.013	0.028	0.028	75.7666	2705.95	35.1774	78.1202	2.61264	2.80617	32.5647	37.9835
																																	20:27:23	2024-03-16 20:27:23	2d	0.014	0.028	0.028	75.7666	2705.95	37.8833	78.1202	2.61264	2.80617	35.2707	40.6895
																																	20:27:41	2024-03-16 20:27:41	2d	0.013	0.028	0.028	75.7666	2705.95	35.1774	78.1202	2.61264	2.80617	32.5647	37.9835
																																	20:27:59	2024-03-16 20:27:59	2d	0.012	0.028	0.028	75.7666	2705.95	32.4714	78.1202	2.61264	2.80617	29.8588	35.2776
																																	20:28:10	2024-03-16 20:28:10	2d	0.012	0.028	0.028	75.7666	2705.95	32.4714	78.1202	2.61264	2.80617	29.8588	35.2776
																																	20:28:25	2024-03-16 20:28:25	2d	0.013	0.028	0.028	75.7666	2705.95	35.1774	78.1202	2.61264	2.80617	32.5647	37.9835
																																	20:28:41	2024-03-16 20:28:41	2d	0.013	0.028	0.028	75.7666	2705.95	35.1774	78.1202	2.61264	2.80617	32.5647	37.9835
																																	20:29:03	2024-03-16 20:29:03	2d	0.017	0.028	0.028	75.7666	2705.95	46.0012	78.1202	2.61264	2.80617	43.3885	48.8073
																																	20:29:36	2024-03-16 20:29:36	2d	0.013	0.028	0.028	75.7666	2705.95	35.1774	78.1202	2.61264	2.80617	32.5647	37.9835
																																	20:30:01	2024-03-16 20:30:01	2d	0.014	0.028	0.028	75.7666	2705.95	37.8833	78.1202	2.61264	2.80617	35.2707	40.6895
																																	20:30:34	2024-03-16 20:30:34	2d	0.011	0.028	0.028	75.7666	2705.95	29.7655	78.1202	2.61264	2.80617	27.1528	32.5716
																																	20:31:02	2024-03-16 20:31:02	2d	0.012	0.028	0.028	75.7666	2705.95	32.4714	78.1202	2.61264	2.80617	29.8588	35.2776
																																	20:32:07	2024-03-16 20:32:07	2d	0.013	0.028	0.028	75.7666	2705.95	35.1774	78.1202	2.61264	2.80617	32.5647	37.9835
																																	20:32:59	2024-03-16 20:32:59	2d	0.012	0.028	0.028	75.7666	2705.95	32.4714	78.1202	2.61264	2.80617	29.8588	35.2776
																																	20:34:05	2024-03-16 20:34:05	2d	0.012	0.028	0.028	75.7666	2705.95	32.4714	78.1202	2.61264	2.80617	29.8588	35.2776
																																	20:35:05	2024-03-16 20:35:05	2d	0.009	0.019	0.019	75.7666	3987.72	35.8895	78.1202	3.78833	4.20926	32.1011	40.0987
																																	20:36:10	2024-03-16 20:36:10	2d	0.01	0.019	0.019	75.7666	3987.72	39.8772	78.1202	3.78833	4.20926	36.0888	44.0864
																																	20:37:03	2024-03-16 20:37:03	2d	0.011	0.019	0.019	75.7666	3987.72	43.8649	78.1202	3.78833	4.20926	40.0766	48.0742
																																	20:38:06	2024-03-16 20:38:06	2d	0.01	0.019	0.019	75.7666	3987.72	39.8772	78.1202	3.78833	4.20926	36.0888	44.0864
																																	20:39:00	2024-03-16 20:39:00	2d	0.01	0.019	0.019	75.7666	3987.72	39.8772	78.1202	3.78833	4.20926	36.0888	44.0864
																																	20:40:07	2024-03-16 20:40:07	2d	0.01	0.019	0.019	75.7666	3987.72	39.8772	78.1202	3.78833	4.20926	36.0888	44.0864
																																	20:43:02	2024-03-16 20:43:02	2d	0.009	0.019	0.019	75.7666	3987.72	35.8895	78.1202	3.78833	4.20926	32.1011	40.0987
																																	20:46:06	2024-03-16 20:46:06	2d	0.009	0.019	0.019	75.7666	3987.72	35.8895	78.1202	3.78833	4.20926	32.1011	40.0987
																																	20:47:48	2024-03-16 20:47:48	2d	0.01	0.019	0.019	75.7666	3987.72	39.8772	78.1202	3.78833	4.20926	36.0888	44.0864
																																	20:49:57	2024-03-16 20:49:57	2d	0.006	0.011	0.011	75.7666	6887.88	41.3273	78.1202	6.31389	7.57666	35.0134	48.9039
																																	20:55:04	2024-03-16 20:55:04	2d	0.005	0.011	0.011	75.7666	6887.88	34.4394	78.1202	6.31389	7.57666	28.1255	42.016
																																	20:59:55	2024-03-16 20:59:55	2d	0.005	0.011	0.011	75.7666	6887.88	34.4394	78.1202	6.31389	7.57666	28.1255	42.016
																																	21:00:06	2024-03-16 21:00:06	2d	0.005	0.011	0.011	75.7666	6887.88	34.4394	78.1202	6.31389	7.57666	28.1255	42.016
																																	21:03:08	2024-03-16 21:03:08	2d	0.006	0.011	0.011	75.7666	6887.88	41.3273	78.1202	6.31389	7.57666	35.0134	48.9039
																																	21:06:10	2024-03-16 21:06:10	2d	0.006	0.011	0.011	75.7666	6887.88	41.3273	78.1202	6.31389	7.57666	35.0134	48.9039
																																	21:09:43	2024-03-16 21:09:43	2d	0.004	0.011	0.011	75.7666	6887.88	27.5515	78.1202	6.31389	7.57666	21.2376	35.1282
																																	21:15:06	2024-03-16 21:15:06	2d	0.004	0.011	0.011	75.7666	6887.88	27.5515	78.1202	6.31389	7.57666	21.2376	35.1282
																																	21:20:06	2024-03-16 21:20:06	2d	0.005	0.011	0.011	75.7666	6887.88	34.4394	78.1202	6.31389	7.57666	28.1255	42.016
																																	21:25:08	2024-03-16 21:25:08	2d	0.005	0.011	0.011	75.7666	6887.88	34.4394	78.1202	6.31389	7.57666	28.1255	42.016
																																	21:30:03	2024-03-16 21:30:03	2d	0.003	0.011	0.011	75.7666	6887.88	20.6636	78.1202	6.31389	7.57666	14.3497	28.2403
																																	21:35:08	2024-03-16 21:35:08	2d	0.004	0.011	0.011	75.7666	6887.88	27.5515	78.1202	6.31389	7.57666	21.2376	35.1282
																																	21:40:03	2024-03-16 21:40:03	2d	0.004	0.011	0.011	75.7666	6887.88	27.5515	78.1202	6.31389	7.57666	21.2376	35.1282
																																	21:45:07	2024-03-16 21:45:07	2d	0.005	0.011	0.011	75.7666	6887.88	34.4394	78.1202	6.31389	7.57666	28.1255	42.016
																																	21:50:00	2024-03-16 21:50:00	2d	0.005	0.011	0.011	75.7666	6887.88	34.4394	78.1202	6.31389	7.57666	28.1255	42.016
																																	21:55:04	2024-03-16 21:55:04	2d	0.004	0.011	0.011	75.7666	6887.88	27.5515	78.1202	6.31389	7.57666	21.2376	35.1282
																																	22:00:07	2024-03-16 22:00:07	2d	0.004	0.011	0.011	75.7666	6887.88	27.5515	78.1202	6.31389	7.57666	21.2376	35.1282
																																	22:05:09	2024-03-16 22:05:09	2d	0.005	0.011	0.011	75.7666	6887.88	34.4394	78.1202	6.31389	7.57666	28.1255	42.016
																																	22:10:02	2024-03-16 22:10:02	2d	0.004	0.011	0.011	75.7666	6887.88	27.5515	78.1202	6.31389	7.57666	21.2376	35.1282
																																	22:15:03	2024-03-16 22:15:03	2d	0.003	0.011	0.011	75.7666	6887.88	20.6636	78.1202	6.31389	7.57666	14.3497	28.2403
																																	22:20:06	2024-03-16 22:20:06	2d	0.003	0.011	0.011	75.7666	6887.88	20.6636	78.1202	6.31389	7.57666	14.3497	28.2403
																																	22:25:04	2024-03-16 22:25:04	2d	0.004	0.011	0.011	75.7666	6887.88	27.5515	78.1202	6.31389	7.57666	21.2376	35.1282
																																	22:30:07	2024-03-16 22:30:07	2d	0.004	0.011	0.011	75.7666	6887.88	27.5515	78.1202	6.31389	7.57666	21.2376	35.1282
																																	22:35:01	2024-03-16 22:35:01	2d	0.003	0.011	0.011	75.7666	6887.88	20.6636	78.1202	6.31389	7.57666	14.3497	28.2403
																																	22:40:05	2024-03-16 22:40:05	2d	0.004	0.011	0.011	75.7666	6887.88	27.5515	78.1202	6.31389	7.57666	21.2376	35.1282
																																	22:45:06	2024-03-16 22:45:06	2d	0.003	0.011	0.011	75.7666	6887.88	20.6636	78.1202	6.31389	7.57666	14.3497	28.2403
																																	22:50:07	2024-03-16 22:50:07	2d	0.003	0.011	0.011	75.7666	6887.88	20.6636	78.1202	6.31389	7.57666	14.3497	28.2403
																																	22:55:02	2024-03-16 22:55:02	2d	0.003	0.011	0.011	75.7666	6887.88	20.6636	78.1202	6.31389	7.57666	14.3497	28.2403
																																	23:00:03	2024-03-16 23:00:03	2d	0.003	0.011	0.011	75.7666	6887.88	20.6636	78.1202	6.31389	7.57666	14.3497	28.2403
																																	23:05:04	2024-03-16 23:05:04	2d	0.002	0.011	0.011	75.7666	6887.88	13.7758	78.1202	6.31389	7.57666	7.46187	21.3524
																																	23:10:03	2024-03-16 23:10:03	2d	0.002	0.011	0.011	75.7666	6887.88	13.7758	78.1202	6.31389	7.57666	7.46187	21.3524
																																	20:26:03									0
																																	20:26:04	2024-03-16 20:26:04	2e	0.004	0.003	0.023	59.7683	2598.62	10.3945	8.03804	2.49035	2.71674	7.90414	13.1112
																																	20:26:08	2024-03-16 20:26:08	2e	0.007	0.009	0.023	59.7683	2598.62	18.1904	24.1141	2.49035	2.71674	15.7	20.9071
																																	20:26:12	2024-03-16 20:26:12	2e	0.009	0.01	0.023	59.7683	2598.62	23.3876	26.7935	2.49035	2.71674	20.8973	26.1043
																																	20:26:20	2024-03-16 20:26:20	2e	0.01	0.012	0.023	59.7683	2598.62	25.9862	32.1521	2.49035	2.71674	23.4959	28.703
																																	20:26:26	2024-03-16 20:26:26	2e	0.008	0.013	0.023	59.7683	2598.62	20.789	34.8315	2.49035	2.71674	18.2986	23.5057
																																	20:26:38	2024-03-16 20:26:38	2e	0.009	0.013	0.023	59.7683	2598.62	23.3876	34.8315	2.49035	2.71674	20.8973	26.1043
																																	20:26:48	2024-03-16 20:26:48	2e	0.01	0.025	0.038	59.7683	1572.85	15.7285	40.5427	1.53252	1.61536	14.196	17.3439
																																	20:27:05	2024-03-16 20:27:05	2e	0.011	0.028	0.038	59.7683	1572.85	17.3014	45.4079	1.53252	1.61536	15.7688	18.9167
																																	20:27:23	2024-03-16 20:27:23	2e	0.01	0.03	0.038	59.7683	1572.85	15.7285	48.6513	1.53252	1.61536	14.196	17.3439
																																	20:27:41	2024-03-16 20:27:41	2e	0.012	0.03	0.038	59.7683	1572.85	18.8742	48.6513	1.53252	1.61536	17.3417	20.4896
																																	20:27:59	2024-03-16 20:27:59	2e	0.013	0.034	0.038	59.7683	1572.85	20.4471	55.1381	1.53252	1.61536	18.9145	22.0624
																																	20:28:10	2024-03-16 20:28:10	2e	0.013	0.038	0.038	59.7683	1572.85	20.4471	61.6249	1.53252	1.61536	18.9145	22.0624
																																	20:28:25	2024-03-16 20:28:25	2e	0.013	0.038	0.038	59.7683	1572.85	20.4471	61.6249	1.53252	1.61536	18.9145	22.0624
																																	20:28:41	2024-03-16 20:28:41	2e	0.014	0.038	0.038	59.7683	1572.85	22.0199	61.6249	1.53252	1.61536	20.4874	23.6353
																																	20:29:03	2024-03-16 20:29:03	2e	0.014	0.038	0.038	59.7683	1572.85	22.0199	61.6249	1.53252	1.61536	20.4874	23.6353
																																	20:29:36	2024-03-16 20:29:36	2e	0.015	0.038	0.038	59.7683	1572.85	23.5928	61.6249	1.53252	1.61536	22.0602	25.2081
																																	20:30:01	2024-03-16 20:30:01	2e	0.014	0.038	0.038	59.7683	1572.85	22.0199	61.6249	1.53252	1.61536	20.4874	23.6353
																																	20:30:34	2024-03-16 20:30:34	2e	0.015	0.038	0.038	59.7683	1572.85	23.5928	61.6249	1.53252	1.61536	22.0602	25.2081
																																	20:31:02	2024-03-16 20:31:02	2e	0.012	0.038	0.038	59.7683	1572.85	18.8742	61.6249	1.53252	1.61536	17.3417	20.4896
																																	20:32:07	2024-03-16 20:32:07	2e	0.014	0.038	0.038	59.7683	1572.85	22.0199	61.6249	1.53252	1.61536	20.4874	23.6353
																																	20:32:59	2024-03-16 20:32:59	2e	0.013	0.038	0.038	59.7683	1572.85	20.4471	61.6249	1.53252	1.61536	18.9145	22.0624
																																	20:34:05	2024-03-16 20:34:05	2e	0.011	0.038	0.038	59.7683	1572.85	17.3014	61.6249	1.53252	1.61536	15.7688	18.9167
																																	20:35:05	2024-03-16 20:35:05	2e	0.01	0.028	0.028	59.7683	2134.58	21.3458	61.6249	2.06098	2.21364	19.2848	23.5595
																																	20:36:10	2024-03-16 20:36:10	2e	0.012	0.028	0.028	59.7683	2134.58	25.615	61.6249	2.06098	2.21364	23.554	27.8286
																																	20:37:03	2024-03-16 20:37:03	2e	0.011	0.028	0.028	59.7683	2134.58	23.4804	61.6249	2.06098	2.21364	21.4194	25.694
																																	20:38:06	2024-03-16 20:38:06	2e	0.011	0.028	0.028	59.7683	2134.58	23.4804	61.6249	2.06098	2.21364	21.4194	25.694
																																	20:39:00	2024-03-16 20:39:00	2e	0.012	0.028	0.028	59.7683	2134.58	25.615	61.6249	2.06098	2.21364	23.554	27.8286
																																	20:40:07	2024-03-16 20:40:07	2e	0.011	0.028	0.028	59.7683	2134.58	23.4804	61.6249	2.06098	2.21364	21.4194	25.694
																																	20:43:02	2024-03-16 20:43:02	2e	0.01	0.028	0.028	59.7683	2134.58	21.3458	61.6249	2.06098	2.21364	19.2848	23.5595
																																	20:46:06	2024-03-16 20:46:06	2e	0.009	0.028	0.028	59.7683	2134.58	19.2112	61.6249	2.06098	2.21364	17.1503	21.4249
																																	20:47:48	2024-03-16 20:47:48	2e	0.011	0.028	0.028	59.7683	2134.58	23.4804	61.6249	2.06098	2.21364	21.4194	25.694
																																	20:49:57	2024-03-16 20:49:57	2e	0.007	0.015	0.015	59.7683	3984.55	27.8919	61.6249	3.73552	4.26916	24.1564	32.161
																																	20:55:04	2024-03-16 20:55:04	2e	0.006	0.015	0.015	59.7683	3984.55	23.9073	61.6249	3.73552	4.26916	20.1718	28.1765
																																	20:59:55	2024-03-16 20:59:55	2e	0.006	0.015	0.015	59.7683	3984.55	23.9073	61.6249	3.73552	4.26916	20.1718	28.1765
																																	21:00:06	2024-03-16 21:00:06	2e	0.006	0.015	0.015	59.7683	3984.55	23.9073	61.6249	3.73552	4.26916	20.1718	28.1765
																																	21:03:08	2024-03-16 21:03:08	2e	0.007	0.015	0.015	59.7683	3984.55	27.8919	61.6249	3.73552	4.26916	24.1564	32.161
																																	21:06:10	2024-03-16 21:06:10	2e	0.006	0.015	0.015	59.7683	3984.55	23.9073	61.6249	3.73552	4.26916	20.1718	28.1765
																																	21:09:43	2024-03-16 21:09:43	2e	0.008	0.015	0.015	59.7683	3984.55	31.8764	61.6249	3.73552	4.26916	28.1409	36.1456
																																	21:15:06	2024-03-16 21:15:06	2e	0.007	0.015	0.015	59.7683	3984.55	27.8919	61.6249	3.73552	4.26916	24.1564	32.161
																																	21:20:06	2024-03-16 21:20:06	2e	0.006	0.015	0.015	59.7683	3984.55	23.9073	61.6249	3.73552	4.26916	20.1718	28.1765
																																	21:25:08	2024-03-16 21:25:08	2e	0.007	0.015	0.015	59.7683	3984.55	27.8919	61.6249	3.73552	4.26916	24.1564	32.161
																																	21:30:03	2024-03-16 21:30:03	2e	0.004	0.015	0.015	59.7683	3984.55	15.9382	61.6249	3.73552	4.26916	12.2027	20.2074
																																	21:35:08	2024-03-16 21:35:08	2e	0.006	0.015	0.015	59.7683	3984.55	23.9073	61.6249	3.73552	4.26916	20.1718	28.1765
																																	21:40:03	2024-03-16 21:40:03	2e	0.005	0.015	0.015	59.7683	3984.55	19.9228	61.6249	3.73552	4.26916	16.1873	24.1919
																																	21:45:07	2024-03-16 21:45:07	2e	0.004	0.015	0.015	59.7683	3984.55	15.9382	61.6249	3.73552	4.26916	12.2027	20.2074
																																	21:50:00	2024-03-16 21:50:00	2e	0.005	0.015	0.015	59.7683	3984.55	19.9228	61.6249	3.73552	4.26916	16.1873	24.1919
																																	21:55:04	2024-03-16 21:55:04	2e	0.005	0.015	0.015	59.7683	3984.55	19.9228	61.6249	3.73552	4.26916	16.1873	24.1919
																																	22:00:07	2024-03-16 22:00:07	2e	0.005	0.015	0.015	59.7683	3984.55	19.9228	61.6249	3.73552	4.26916	16.1873	24.1919
																																	22:05:09	2024-03-16 22:05:09	2e	0.003	0.015	0.015	59.7683	3984.55	11.9537	61.6249	3.73552	4.26916	8.21814	16.2228
																																	22:10:02	2024-03-16 22:10:02	2e	0.004	0.015	0.015	59.7683	3984.55	15.9382	61.6249	3.73552	4.26916	12.2027	20.2074
																																	22:15:03	2024-03-16 22:15:03	2e	0.004	0.015	0.015	59.7683	3984.55	15.9382	61.6249	3.73552	4.26916	12.2027	20.2074
																																	22:20:06	2024-03-16 22:20:06	2e	0.004	0.015	0.015	59.7683	3984.55	15.9382	61.6249	3.73552	4.26916	12.2027	20.2074
																																	22:25:04	2024-03-16 22:25:04	2e	0.004	0.015	0.015	59.7683	3984.55	15.9382	61.6249	3.73552	4.26916	12.2027	20.2074
																																	22:30:07	2024-03-16 22:30:07	2e	0.004	0.015	0.015	59.7683	3984.55	15.9382	61.6249	3.73552	4.26916	12.2027	20.2074
																																	22:35:01	2024-03-16 22:35:01	2e	0.004	0.015	0.015	59.7683	3984.55	15.9382	61.6249	3.73552	4.26916	12.2027	20.2074
																																	22:40:05	2024-03-16 22:40:05	2e	0.004	0.015	0.015	59.7683	3984.55	15.9382	61.6249	3.73552	4.26916	12.2027	20.2074
																																	22:45:06	2024-03-16 22:45:06	2e	0.004	0.015	0.015	59.7683	3984.55	15.9382	61.6249	3.73552	4.26916	12.2027	20.2074
																																	22:50:07	2024-03-16 22:50:07	2e	0.005	0.015	0.015	59.7683	3984.55	19.9228	61.6249	3.73552	4.26916	16.1873	24.1919
																																	22:55:02	2024-03-16 22:55:02	2e	0.003	0.015	0.015	59.7683	3984.55	11.9537	61.6249	3.73552	4.26916	8.21814	16.2228
																																	23:00:03	2024-03-16 23:00:03	2e	0.003	0.015	0.015	59.7683	3984.55	11.9537	61.6249	3.73552	4.26916	8.21814	16.2228
																																	23:05:04	2024-03-16 23:05:04	2e	0.003	0.015	0.015	59.7683	3984.55	11.9537	61.6249	3.73552	4.26916	8.21814	16.2228
																																	23:10:03	2024-03-16 23:10:03	2e	0.003	0.015	0.015	59.7683	3984.55	11.9537	61.6249	3.73552	4.26916	8.21814	16.2228
																																	20:28:12									0
																																	20:28:16	2024-03-16 20:28:16	2f	0.005	0.034	0.089	274.8	3087.64	15.4382	108.241	3.05333	3.12272	12.3849	18.5609
																																	20:28:19	2024-03-16 20:28:19	2f	0.009	0.035	0.089	274.8	3087.64	27.7887	111.424	3.05333	3.12272	24.7354	30.9115
																																	20:28:25	2024-03-16 20:28:25	2f	0.012	0.037	0.089	274.8	3087.64	37.0516	117.791	3.05333	3.12272	33.9983	40.1744
																																	20:28:41	2024-03-16 20:28:41	2f	0.017	0.048	0.089	274.8	3087.64	52.4898	152.81	3.05333	3.12272	49.4365	55.6125
																																	20:29:03	2024-03-16 20:29:03	2f	0.016	0.055	0.089	274.8	3087.64	49.4022	175.095	3.05333	3.12272	46.3489	52.5249
																																	20:29:36	2024-03-16 20:29:36	2f	0.017	0.067	0.089	274.8	3087.64	52.4898	213.298	3.05333	3.12272	49.4365	55.6125
																																	20:30:01	2024-03-16 20:30:01	2f	0.014	0.067	0.089	274.8	3087.64	43.2269	213.298	3.05333	3.12272	40.1736	46.3496
																																	20:30:34	2024-03-16 20:30:34	2f	0.016	0.078	0.089	274.8	3087.64	49.4022	248.317	3.05333	3.12272	46.3489	52.5249
																																	20:31:02	2024-03-16 20:31:02	2f	0.016	0.085	0.089	274.8	3087.64	49.4022	270.602	3.05333	3.12272	46.3489	52.5249
																																	20:32:07	2024-03-16 20:32:07	2f	0.015	0.087	0.089	274.8	3087.64	46.3145	276.969	3.05333	3.12272	43.2612	49.4373
																																	20:32:59	2024-03-16 20:32:59	2f	0.017	0.089	0.089	274.8	3087.64	52.4898	283.336	3.05333	3.12272	49.4365	55.6125
																																	20:34:05	2024-03-16 20:34:05	2f	0.02	0.089	0.089	274.8	3087.64	61.7527	283.336	3.05333	3.12272	58.6994	64.8755
																																	20:35:05	2024-03-16 20:35:05	2f	0.012	0.069	0.069	274.8	3982.6	47.7912	283.336	3.92571	4.04117	43.8655	51.8324
																																	20:36:10	2024-03-16 20:36:10	2f	0.014	0.069	0.069	274.8	3982.6	55.7564	283.336	3.92571	4.04117	51.8307	59.7976
																																	20:37:03	2024-03-16 20:37:03	2f	0.014	0.069	0.069	274.8	3982.6	55.7564	283.336	3.92571	4.04117	51.8307	59.7976
																																	20:38:06	2024-03-16 20:38:06	2f	0.013	0.069	0.069	274.8	3982.6	51.7738	283.336	3.92571	4.04117	47.8481	55.815
																																	20:39:00	2024-03-16 20:39:00	2f	0.013	0.069	0.069	274.8	3982.6	51.7738	283.336	3.92571	4.04117	47.8481	55.815
																																	20:40:07	2024-03-16 20:40:07	2f	0.013	0.069	0.069	274.8	3982.6	51.7738	283.336	3.92571	4.04117	47.8481	55.815
																																	20:43:02	2024-03-16 20:43:02	2f	0.011	0.069	0.069	274.8	3982.6	43.8086	283.336	3.92571	4.04117	39.8829	47.8498
																																	20:46:06	2024-03-16 20:46:06	2f	0.013	0.069	0.069	274.8	3982.6	51.7738	283.336	3.92571	4.04117	47.8481	55.815
																																	20:47:48	2024-03-16 20:47:48	2f	0.016	0.069	0.069	274.8	3982.6	63.7217	283.336	3.92571	4.04117	59.7959	67.7628
																																	20:49:57	2024-03-16 20:49:57	2f	0.008	0.037	0.037	274.8	7427.02	59.4161	283.336	7.23157	7.63332	52.1846	67.0495
																																	20:55:04	2024-03-16 20:55:04	2f	0.009	0.037	0.037	274.8	7427.02	66.8432	283.336	7.23157	7.63332	59.6116	74.4765
																																	20:59:55	2024-03-16 20:59:55	2f	0.008	0.037	0.037	274.8	7427.02	59.4161	283.336	7.23157	7.63332	52.1846	67.0495
																																	21:00:06	2024-03-16 21:00:06	2f	0.008	0.037	0.037	274.8	7427.02	59.4161	283.336	7.23157	7.63332	52.1846	67.0495
																																	21:03:08	2024-03-16 21:03:08	2f	0.008	0.037	0.037	274.8	7427.02	59.4161	283.336	7.23157	7.63332	52.1846	67.0495
																																	21:06:10	2024-03-16 21:06:10	2f	0.007	0.037	0.037	274.8	7427.02	51.9891	283.336	7.23157	7.63332	44.7576	59.6224
																																	21:09:43	2024-03-16 21:09:43	2f	0.009	0.037	0.037	274.8	7427.02	66.8432	283.336	7.23157	7.63332	59.6116	74.4765
																																	21:15:06	2024-03-16 21:15:06	2f	0.01	0.037	0.037	274.8	7427.02	74.2702	283.336	7.23157	7.63332	67.0386	81.9035
																																	21:20:06	2024-03-16 21:20:06	2f	0.007	0.037	0.037	274.8	7427.02	51.9891	283.336	7.23157	7.63332	44.7576	59.6224
																																	21:25:08	2024-03-16 21:25:08	2f	0.01	0.037	0.037	274.8	7427.02	74.2702	283.336	7.23157	7.63332	67.0386	81.9035
																																	21:30:03	2024-03-16 21:30:03	2f	0.007	0.037	0.037	274.8	7427.02	51.9891	283.336	7.23157	7.63332	44.7576	59.6224
																																	21:35:08	2024-03-16 21:35:08	2f	0.007	0.037	0.037	274.8	7427.02	51.9891	283.336	7.23157	7.63332	44.7576	59.6224
																																	21:40:03	2024-03-16 21:40:03	2f	0.008	0.037	0.037	274.8	7427.02	59.4161	283.336	7.23157	7.63332	52.1846	67.0495
																																	21:45:07	2024-03-16 21:45:07	2f	0.007	0.037	0.037	274.8	7427.02	51.9891	283.336	7.23157	7.63332	44.7576	59.6224
																																	21:50:00	2024-03-16 21:50:00	2f	0.007	0.037	0.037	274.8	7427.02	51.9891	283.336	7.23157	7.63332	44.7576	59.6224
																																	21:55:04	2024-03-16 21:55:04	2f	0.005	0.037	0.037	274.8	7427.02	37.1351	283.336	7.23157	7.63332	29.9035	44.7684
																																	22:00:07	2024-03-16 22:00:07	2f	0.005	0.037	0.037	274.8	7427.02	37.1351	283.336	7.23157	7.63332	29.9035	44.7684
																																	22:05:09	2024-03-16 22:05:09	2f	0.006	0.037	0.037	274.8	7427.02	44.5621	283.336	7.23157	7.63332	37.3305	52.1954
																																	22:10:02	2024-03-16 22:10:02	2f	0.005	0.037	0.037	274.8	7427.02	37.1351	283.336	7.23157	7.63332	29.9035	44.7684
																																	22:15:03	2024-03-16 22:15:03	2f	0.006	0.037	0.037	274.8	7427.02	44.5621	283.336	7.23157	7.63332	37.3305	52.1954
																																	22:20:06	2024-03-16 22:20:06	2f	0.005	0.037	0.037	274.8	7427.02	37.1351	283.336	7.23157	7.63332	29.9035	44.7684
																																	22:25:04	2024-03-16 22:25:04	2f	0.006	0.037	0.037	274.8	7427.02	44.5621	283.336	7.23157	7.63332	37.3305	52.1954
																																	22:30:07	2024-03-16 22:30:07	2f	0.006	0.037	0.037	274.8	7427.02	44.5621	283.336	7.23157	7.63332	37.3305	52.1954
																																	22:35:01	2024-03-16 22:35:01	2f	0.006	0.037	0.037	274.8	7427.02	44.5621	283.336	7.23157	7.63332	37.3305	52.1954
																																	22:40:05	2024-03-16 22:40:05	2f	0.006	0.037	0.037	274.8	7427.02	44.5621	283.336	7.23157	7.63332	37.3305	52.1954
																																	22:45:00	2024-03-16 22:45:00	2f	0.006	0.037	0.037	274.8	7427.02	44.5621	283.336	7.23157	7.63332	37.3305	52.1954
																																	22:50:07	2024-03-16 22:50:07	2f	0.006	0.037	0.037	274.8	7427.02	44.5621	283.336	7.23157	7.63332	37.3305	52.1954
																																	22:55:02	2024-03-16 22:55:02	2f	0.005	0.037	0.037	274.8	7427.02	37.1351	283.336	7.23157	7.63332	29.9035	44.7684
																																	23:00:03	2024-03-16 23:00:03	2f	0.005	0.037	0.037	274.8	7427.02	37.1351	283.336	7.23157	7.63332	29.9035	44.7684
																																	23:05:04	2024-03-16 23:05:04	2f	0.005	0.037	0.037	274.8	7427.02	37.1351	283.336	7.23157	7.63332	29.9035	44.7684
																																	23:10:03	2024-03-16 23:10:03	2f	0.005	0.037	0.037	274.8	7427.02	37.1351	283.336	7.23157	7.63332	29.9035	44.7684
[truncated: 14 more columns]

## Sheet: MAY PROPAGATION
MAY ERUPTION
FISSURE PROPAGATION OBSERVATIONS AND CAMERA NOTES									FISSURE PROPAGATION TIMES AND SPEEDS
Date	Time	Active Fissures	Notes about fissures	Notes about camera	Webcam				Fissure	Opening time	Propogation ends (north)	Propogation ends (south)	Propogation ends	Propogation duration	Propogation duration (s)	Fissure length	Propogation speed (m/s)	Propogation speed (m/min)
2024-05-29	12:46:12	1f	start of eruption	behind a large cone lots of gas so hard to see propogation	webcam a				1a	13:01:30	13:07:55		13:07:55	00:06:25	385	75.3	0.195584	11.7351
	12:46:59	1e	fissure starts propogating from the middle	cant see when propogation stops to the south because of the perspective	thorbjorn 2				1b	12:56:06	12:59:29		12:59:29	00:03:23	203	104.6	0.515271	30.9163
	12:47:13	1f	fissure stops propogatinhg to the north		thorbjorn 2				1c	12:51:12	12:54:06		12:54:06	00:02:54	174	438.2	2.51839	151.103
	12:48:06	1e	northern most extent reached		webcam 2				1d	12:48:30	12:50:03		12:50:03	00:01:33	93	100	1.07527	64.5161
	12:48:30	1e	segment propogates from its southern end		webcam 2				1e	12:46:59	12:48:06	12:48:30	12:48:30	00:01:31	91	205.4	2.25714	135.429
	12:50:03	1d	fissure stops propogating to the north		webcam 2				1f	12:46:12	12:47:13	12:51:12	12:51:12	00:05:00	300	522.2	1.74067	104.44
	12:51:12	1f	southernmost fissure of segment 1 stops propogating to the south		webcam a				2a	12:52:57	12:53:26	12:53:14	12:53:26	00:00:29	29	164.6	5.67586	340.552
	12:51:45	1c	fissure starts propogating from the south	camera just zooms in so liklely a little before this	reykjanes 2				2b	12:55:46			12:55:46	00:00:00	0	85.1
	12:52:57	2a	very small fissure 2a opens from the middle	edge of view so hard to see	webcam a				3a	12:56:03		12:59:52	12:59:52	00:03:49	229	324.5	1.41703	85.0218
	12:53:14	2a	fissure stops propogating to the south	hard to see propogation because it is behind 3a	webcam a				3b	13:01:13		13:26:42	13:26:42	00:25:29	1529	395.8	0.258862	15.5317
	12:53:26	2a	fissure stops propogating to the north		webcam a				3c	13:30:45			13:30:45	00:00:00	0	49.5
	12:54:06	1c	fissure 1c stops propogating to the north		webcam 2				3d	13:51:09	13:54:42		13:54:42	00:03:33	213	127.3	0.597653	35.8592
	12:55:46	2b	very small fissure propogates ofset behind the main fissures		webcam a				3e	13:47:02	13:48:09	13:49:20	13:49:20	00:02:18	138	154.1	1.11667	67
	12:56:03	3a	fissure propogates, view hidden by a mound so propogation may have been a few seconds earlier		webcam a				3f	13:57:20		14:21:57	14:21:57	00:24:37	1477	84.3	0.0570752	3.42451
	12:56:06	1b	fissure 1b starts propogatinhg from the south		webcam 2				3g	15:51:40		16:36:35	16:36:35	00:44:55	2695	173.1	0.0642301	3.8538
	12:59:29	1b	fissure 1b stops propogating to the north		webcam 2											3004
	12:59:52	3a	fissure stops propogating to the south		reykjanes 2
	13:01:13	3b	fissure that goes through the cone starts propogating from the northern end		webcam 2
	13:01:30	1a	fissure 1a starts propogationg from the south		webcam 2
	13:03:29	3b	fissure starts breaking through the cone		reykjanes 2
	13:06:18	3b	fissure breaks through the cone		reykjanes 2
	13:07:55	1a	northernmost extent of fissure 1a reached		webcam 2
	13:13:17	3d	new fissure opens from its northern extent		webcam a
	13:13:17	3b	new sectio of 3b opens		webcam a
	13:14:14	3b	fills in bacjkward		reykjanes 2
	13:19:34	3b	new bit of 3b opens		webcam 2
	13:26:42	3b	southernmost extent of fissure is reached		webcam 2
	13:30:45	3c	new small fissure propogates		webcam 2
	13:47:02	3e	fissure opens in the middle		thorbjorn 2
	13:48:09	3e	fissure stops propogating to the north		thorbjorn 2
	13:49:20	3e	fissure stops propogfating to the south		webcam a
	13:51:09	3d	fissure opens from the southish end		thorbjorn 2
	13:54:42	3d	fisure finishes propogating to the north		thorbjoprn 2
	13:57:20	3f	gas starts to be emitted which suggests fissure has opened, there is lava visible a bit later, but this fissure is hidden behind a mound which makes it hard to see		webcam a
	14:02:49	3f	more southern segment of this fissure opens with really brown smoke which suggests groundwater interaction	again hidden behind a mound so hard to see	throbjorn 2
	14:21:57	3f	new fissure segment opens to the south		webcam a
	15:30:00	3f	from half 5 fissure 3f seems to be dying out and emitting lots of smoke		webcam a
	15:42:46		black smoke is emitted from a large crack in the ground but no lava is visible and 3f becomes very active again and starts emitting black smoke		webcam a
	15:51:40	3g	fissure starts propogating, really hard to see because of lots of smoke in the air but can just about see this fissure p[ropogating		thorbjorn 2
	16:11:57	3g	new fissure segment opens to the south, propagates north quickly	hard to see because of smoke	thorbjorn 2
	16:12:37	3g	16:11 fissure segment stops propogating to the north		thorbjorn 2
	16:12:57	3g	new segement opens to the south		thorbjorn 2
	16:31:08	3g	tiny fissure to the front opens doesn’t resally open much at all		thorbjorn 2
	16:36:35	3g	southern most fissure opens		thorbjorn 2

## Sheet: AUGUST FIRE FOUNTAINS
AUGUST ERUPTION
FISSURE PROPAGATION OBSERVATIONS AND CAMERA NOTES									FISSURE PROPAGATION TIMES AND SPEEDS													APPARENT FISSURE LENGTH BASED ON FISSURE ANGLE AND WEBCAM VIEW ANGLE											FIRE FOUNTAIN HEIGHTS FOR FISSURE SEGMENT 3
																																	Fissure 3
Date	Time	Active Fissures	Notes about fissures	Notes about camera	Webcam				Fissure	Opening time	Propogation ends (north)	Propogation ends (south)	Propogation ends	Propogation duration	Propogation duration (s)	Fissure length	Propogation speed (m/s)	Propogation speed (m/min)				fissure	webcam	webcam bearing	fissure bearing	real fissure length	e	g	apparent fissure length				Time	Time and date	Fissure	Fire fountain height on screen (m)	Fissure length on screen at time (m)	Total fissure length on screen (m)	Real apparent fissure length (m)	Scaling factor	Real fire fountain height (m)	real apparent fissure segment length	Real fissure segment length (m)	Positive uncertainty	Negative uncertainty	Lower bound	Upper bound
2024-08-22	21:25:50	4a	start of eruption		webcam 1				1	03:50:00	05:30:00		05:30:00	01:40:00	6000	514.3	0.0857167	5.143				3a	webcam1/thornjorn	46.2	41.8	0	4.4	85.6	0				22:30:42										0
2024-08-22	21:27:16	4a	fissure reaches southern most extent		lang				2a	02:25:00	02:38:00		02:38:00	00:13:00	780	591.1	0.757821	45.4692				3b	webcam1/thornjorn	46.7	36.6	523.5	10.1	79.9	91.8045				22:31:02	2024-08-22 22:31:02	3b	0.002	0.002	0.009	91.8045	10200.5	20.401	20.401	116.333	9.18045	11.4756	11.2205	31.8766
2024-08-22	21:27:16	4b	fissure propogates close to its northern extent		lang				2b	02:12:00						60.8						3c	webcam1/thornjorn	47.6	38.2	966.4	9.4	80.6	157.838				22:31:14	2024-08-22 22:31:14	3b	0.002	0.003	0.009	91.8045	10200.5	20.401	30.6015	174.5	9.18045	11.4756	11.2205	31.8766
2024-08-22	21:27:43	4a	fissure finishes propagating to the north		lang				2c	02:12:00						59.6						4a	webcam1/thornjorn	51.6	31.1	1442	20.5	69.5	504.999				22:31:26	2024-08-22 22:31:26	3b	0.002	0.003	0.009	91.8045	10200.5	20.401	30.6015	174.5	9.18045	11.4756	11.2205	31.8766
2024-08-22	21:27:54	4b	fissure finishes propagating to the north		lang				2d	02:12:00						70.3						4b	webcam1/thornjorn	61.1	23.8	786.7	37.3	52.7	476.731				22:31:39	2024-08-22 22:31:39	3b	0.002	0.003	0.009	91.8045	10200.5	20.401	30.6015	174.5	9.18045	11.4756	11.2205	31.8766
2024-08-22	21:27:59	3c	fissure propagates from the southern end		lang																	5a	webcam1/thornjorn	66.5	33.5	72.6	33	57	39.5408				22:31:51	2024-08-22 22:31:51	3b	0.003	0.003	0.009	91.8045	10200.5	30.6015	30.6015	174.5	9.18045	11.4756	21.421	42.0771
2024-08-22	21:28:58	3c	fissure stops propogating to the north		lang				3ab	22:30:42	22:46:08		22:46:08	00:15:26	926	523.5	0.565335	33.9201				5b	webcam1/thornjorn	68.6	25.6	172.5	43	47	117.645				22:32:01	2024-08-22 22:32:01	3b	0.002	0.003	0.009	91.8045	10200.5	20.401	30.6015	174.5	9.18045	11.4756	11.2205	31.8766
2024-08-22	21:29:13	3b	fissure starts propagating from the southern end		lang				3c	21:43:04	22:23:59		22:23:59	00:40:55	2455	966.4	0.393646	23.6187				5c	webcam1/thornjorn	71.4	1.8	107.1	69.6	20.4	100.383				22:32:13	2024-08-22 22:32:13	3b	0.002	0.003	0.009	91.8045	10200.5	20.401	30.6015	174.5	9.18045	11.4756	11.2205	31.8766
2024-08-22	21:29:47	3b	fissure stops propagating to the north		lang				4a	21:25:50	21:42:29	21:26:08	21:42:29	00:16:39	999	1442	1.44344	86.6066				5d	webcam1/thornjorn	73.3	7.4	72.7	65.9	24.1	66.363				22:32:23	2024-08-22 22:32:23	3b	0.003	0.003	0.009	91.8045	10200.5	30.6015	30.6015	174.5	9.18045	11.4756	21.421	42.0771
2024-08-22	21:30:03	3a	new fissure propogates to the north		lang				4b	21:27:16	21:27:54	21:34:15	21:34:15	00:06:59	419	786.7	1.87757	112.654				3a	lang	49.6	41.8	0	268.6	82.2	0				22:32:40	2024-08-22 22:32:40	3b	0.002	0.003	0.009	91.8045	10200.5	20.401	30.6015	174.5	9.18045	11.4756	11.2205	31.8766
2024-08-22	21:32:46	3a	fissure stops propagating to the north		webcam 1				5a	21:34:57		21:43:08	21:43:08	00:08:11	491	72.6	0.147862	8.87169				3b	lang	51.9	36.6	523.5	271.5	74.7	523.321				22:32:57	2024-08-22 22:32:57	3b	0.003	0.003	0.009	91.8045	10200.5	30.6015	30.6015	174.5	9.18045	11.4756	21.421	42.0771
2024-08-22	21:32:49	4b	fissure stops propagating to the south		webcam 1				5b	21:44:42	22:01:00		22:01:00	00:16:18	978	172.5	0.17638	10.5828				3c	lang	59.5	38.2	966.4	262.3	68.7	957.686				22:33:14	2024-08-22 22:33:14	3b	0.003	0.003	0.009	91.8045	10200.5	30.6015	30.6015	174.5	9.18045	11.4756	21.421	42.0771
2024-08-22	21:33:12	4b	fissure propagates from the northern end		webcam 1				5c	22:01:04						107.1						4a	lang	71.4	31.1	1442	257.5	49.7	1407.82				22:33:31	2024-08-22 22:33:31	3b	0.003	0.003	0.009	91.8045	10200.5	30.6015	30.6015	174.5	9.18045	11.4756	21.421	42.0771
2024-08-22	21:33:21	2d	fissure stops propogating to the south		webcam 1				5d	22:08:44						72.7						4b	lang	82.7	23.8	786.7	253.5	31.1	754.303				22:33:46	2024-08-22 22:33:46	3b	0.003	0.003	0.009	91.8045	10200.5	30.6015	30.6015	174.5	9.18045	11.4756	21.421	42.0771
2024-08-22	21:34:13	4b	fissure stops propagating to the south		webcam 1											4143.5						5a	lang	86.9	33.5	72.6	239.6	36.6	62.6185				22:34:00	2024-08-22 22:34:00	3b	0.003	0.004	0.009	91.8045	10200.5	30.6015	40.802	232.667	9.18045	11.4756	21.421	42.0771
2024-08-22	21:34:15	4b	fissure reaches the southern end		webcam 1																	5b	lang	88	25.6	172.5	246.4	27.6	158.073				22:34:17	2024-08-22 22:34:17	3b	0.003	0.004	0.009	91.8045	10200.5	30.6015	40.802	232.667	9.18045	11.4756	21.421	42.0771
2024-08-22	21:34:57	5a	fissure starts propagating from the north end		webcam 1																	5c	lang	89.4	1.8	107.1	268.8	2.4	107.077				22:34:37	2024-08-22 22:34:37	3b	0.003	0.004	0.009	91.8045	10200.5	30.6015	40.802	232.667	9.18045	11.4756	21.421	42.0771
2024-08-22	21:35:52	2d	fissure propagation ends north		webcam 1																	5d	lang	90.3	7.4	72.7	262.3	7.1	72.0445				22:34:59	2024-08-22 22:34:59	3b	0.003	0.004	0.009	91.8045	10200.5	30.6015	40.802	232.667	9.18045	11.4756	21.421	42.0771
2024-08-22	21:37:11	2c	fissure stops propogating to the south		webcam 1																												22:35:22	2024-08-22 22:35:22	3b	0.003	0.004	0.009	91.8045	10200.5	30.6015	40.802	232.667	9.18045	11.4756	21.421	42.0771
2024-08-22	21:40:11	2c	propagation ends north		webcam 1																												22:35:33	2024-08-22 22:35:33	3b	0.004	0.004	0.009	91.8045	10200.5	40.802	40.802	232.667	9.18045	11.4756	31.6215	52.2776
2024-08-22	21:42:11	2b	fissure starts propagating from the south		webcam 1																												22:36:00	2024-08-22 22:36:00	3b	0.003	0.004	0.009	91.8045	10200.5	30.6015	40.802	232.667	9.18045	11.4756	21.421	42.0771
2024-08-22	21:43:06	2c	propagation ends north		webcam 1																												22:36:40	2024-08-22 22:36:40	3b	0.004	0.004	0.009	91.8045	10200.5	40.802	40.802	232.667	9.18045	11.4756	31.6215	52.2776
2024-08-22	21:43:08	5a	fissure propagates to thrnsouth		webcam 11																												22:37:05	2024-08-22 22:37:05	3b	0.003	0.004	0.009	91.8045	10200.5	30.6015	40.802	232.667	9.18045	11.4756	21.421	42.0771
2024-08-22	21:44:26	2a	fissure stops propagating to the north		webcam 1																												22:37:33	2024-08-22 22:37:33	3b	0.003	0.004	0.009	91.8045	10200.5	30.6015	40.802	232.667	9.18045	11.4756	21.421	42.0771
2024-08-22	21:44:42	5b	fissure starts propagating from the north, hard to see because of the old cone	really hard to see because of zoomed out cameras and wrong angles	webcam 11																												22:38:07	2024-08-22 22:38:07	3b	0.003	0.004	0.009	91.8045	10200.5	30.6015	40.802	232.667	9.18045	11.4756	21.421	42.0771
2024-08-22	22:00:04	1a	finishes propagating to the south		thorbjorn 2																												22:39:07	2024-08-22 22:39:07	3b	0.004	0.004	0.009	91.8045	10200.5	40.802	40.802	232.667	9.18045	11.4756	31.6215	52.2776
2024-08-22	22:01:00	5b	fissure stops propagating to the south		thorbjorn 2																												22:39:44	2024-08-22 22:39:44	3b	0.003	0.004	0.009	91.8045	10200.5	30.6015	40.802	232.667	9.18045	11.4756	21.421	42.0771
2024-08-22	22:01:04	5c	fissure starts propagating from the north, hard to see because of the old cone		thorbjorn 2																												22:40:30	2024-08-22 22:40:30	3b	0.003	0.004	0.009	91.8045	10200.5	30.6015	40.802	232.667	9.18045	11.4756	21.421	42.0771
2024-08-22	22:08:44	5d	new fissure propoagates, hidden behind a cone, but this is the first time you see lava		thorbjorn 2																												22:41:03	2024-08-22 22:41:03	3b	0.003	0.004	0.009	91.8045	10200.5	30.6015	40.802	232.667	9.18045	11.4756	21.421	42.0771
2024-08-22	22:46:04	1a	fissure stops propagatibng to the north		webcam 1																												22:42:01	2024-08-22 22:42:01	3b	0.003	0.004	0.009	91.8045	10200.5	30.6015	40.802	232.667	9.18045	11.4756	21.421	42.0771
																																	22:43:05	2024-08-22 22:43:05	3b	0.003	0.004	0.009	91.8045	10200.5	30.6015	40.802	232.667	9.18045	11.4756	21.421	42.0771
																																	22:44:03	2024-08-22 22:44:03	3b	0.004	0.005	0.009	91.8045	10200.5	40.802	51.0025	290.833	9.18045	11.4756	31.6215	52.2776
																																	22:45:05	2024-08-22 22:45:05	3b	0.004	0.005	0.009	91.8045	10200.5	40.802	51.0025	290.833	9.18045	11.4756	31.6215	52.2776
																																	22:46:03	2024-08-22 22:46:03	3b	0.003	0.007	0.009	91.8045	10200.5	30.6015	71.4035	407.167	9.18045	11.4756	21.421	42.0771	3.93182
																																	22:46:08	2024-08-22 22:46:08	3b	0.004	0.009	0.009	91.8045	10200.5	40.802	91.8045	523.5	9.18045	11.4756	31.6215	52.2776	0.0547074
																																	22:46:28	2024-08-22 22:46:28	3b	0.003	0.009	0.009	91.8045	10200.5	30.6015	91.8045	523.5	9.18045	11.4756	21.421	42.0771
																																	22:47:02	2024-08-22 22:47:02	3b	0.004	0.009	0.009	91.8045	10200.5	40.802	91.8045	523.5	9.18045	11.4756	31.6215	52.2776
																																	22:48:04	2024-08-22 22:48:04	3b	0.004	0.009	0.009	91.8045	10200.5	40.802	91.8045	523.5	9.18045	11.4756	31.6215	52.2776	1.39516
																																	22:49:05	2024-08-22 22:49:05	3b	0.004	0.009	0.009	91.8045	10200.5	40.802	91.8045	523.5	9.18045	11.4756	31.6215	52.2776	0.154122
																																	22:50:04	2024-08-22 22:50:04	3b	0.006	0.009	0.009	91.8045	10200.5	61.203	91.8045	523.5	9.18045	11.4756	52.0225	72.6785
																																	22:51:02	2024-08-22 22:51:02	3b	0.005	0.009	0.009	91.8045	10200.5	51.0025	91.8045	523.5	9.18045	11.4756	41.822	62.478	0.882653
																																	22:52:06	2024-08-22 22:52:06	3b	0.005	0.009	0.009	91.8045	10200.5	51.0025	91.8045	523.5	9.18045	11.4756	41.822	62.478	0.244318
																																	22:53:09	2024-08-22 22:53:09	3b	0.005	0.009	0.009	91.8045	10200.5	51.0025	91.8045	523.5	9.18045	11.4756	41.822	62.478
																																	22:54:02	2024-08-22 22:54:02	3b	0.005	0.009	0.009	91.8045	10200.5	51.0025	91.8045	523.5	9.18045	11.4756	41.822	62.478
																																	22:54:52	2024-08-22 22:54:52	3b	0.004	0.009	0.009	91.8045	10200.5	40.802	91.8045	523.5	9.18045	11.4756	31.6215	52.2776
																																	22:56:02	2024-08-22 22:56:02	3b	0.005	0.009	0.009	91.8045	10200.5	51.0025	91.8045	523.5	9.18045	11.4756	41.822	62.478
																																	22:57:02	2024-08-22 22:57:02	3b	0.005	0.009	0.009	91.8045	10200.5	51.0025	91.8045	523.5	9.18045	11.4756	41.822	62.478
																																	22:58:04	2024-08-22 22:58:04	3b	0.005	0.009	0.009	91.8045	10200.5	51.0025	91.8045	523.5	9.18045	11.4756	41.822	62.478
																																	22:59:06	2024-08-22 22:59:06	3b	0.004	0.009	0.009	91.8045	10200.5	40.802	91.8045	523.5	9.18045	11.4756	31.6215	52.2776
																																	23:00:02	2024-08-22 23:00:02	3b	0.004	0.009	0.009	91.8045	10200.5	40.802	91.8045	523.5	9.18045	11.4756	31.6215	52.2776
																																	23:01:06	2024-08-22 23:01:06	3b	0.004	0.009	0.009	91.8045	10200.5	40.802	91.8045	523.5	9.18045	11.4756	31.6215	52.2776
																																	23:02:03	2024-08-22 23:02:03	3b	0.004	0.009	0.009	91.8045	10200.5	40.802	91.8045	523.5	9.18045	11.4756	31.6215	52.2776
																																	23:03:06	2024-08-22 23:03:06	3b	0.005	0.009	0.009	91.8045	10200.5	51.0025	91.8045	523.5	9.18045	11.4756	41.822	62.478
																																	23:04:04	2024-08-22 23:04:04	3b	0.005	0.009	0.009	91.8045	10200.5	51.0025	91.8045	523.5	9.18045	11.4756	41.822	62.478
																																	23:05:06	2024-08-22 23:05:06	3b	0.005	0.009	0.009	91.8045	10200.5	51.0025	91.8045	523.5	9.18045	11.4756	41.822	62.478
																																	23:06:01	2024-08-22 23:06:01	3b	0.005	0.009	0.009	91.8045	10200.5	51.0025	91.8045	523.5	9.18045	11.4756	41.822	62.478
																																	23:07:03	2024-08-22 23:07:03	3b	0.005	0.009	0.009	91.8045	10200.5	51.0025	91.8045	523.5	9.18045	11.4756	41.822	62.478
																																	23:08:01	2024-08-22 23:08:01	3b	0.005	0.009	0.009	91.8045	10200.5	51.0025	91.8045	523.5	9.18045	11.4756	41.822	62.478
																																	23:09:07	2024-08-22 23:09:07	3b	0.005	0.009	0.009	91.8045	10200.5	51.0025	91.8045	523.5	9.18045	11.4756	41.822	62.478
																																	23:10:06	2024-08-22 23:10:06	3b	0.006	0.009	0.009	91.8045	10200.5	61.203	91.8045	523.5	9.18045	11.4756	52.0225	72.6785
																																	23:11:03	2024-08-22 23:11:03	3b	0.004	0.009	0.009	91.8045	10200.5	40.802	91.8045	523.5	9.18045	11.4756	31.6215	52.2776
																																	23:12:06	2024-08-22 23:12:06	3b	0.005	0.009	0.009	91.8045	10200.5	51.0025	91.8045	523.5	9.18045	11.4756	41.822	62.478
																																	23:13:06	2024-08-22 23:13:06	3b	0.006	0.009	0.009	91.8045	10200.5	61.203	91.8045	523.5	9.18045	11.4756	52.0225	72.6785
																																	23:14:06	2024-08-22 23:14:06	3b	0.005	0.009	0.009	91.8045	10200.5	51.0025	91.8045	523.5	9.18045	11.4756	41.822	62.478
																																	23:15:04	2024-08-22 23:15:04	3b	0.005	0.009	0.009	91.8045	10200.5	51.0025	91.8045	523.5	9.18045	11.4756	41.822	62.478
																																	23:16:04	2024-08-22 23:16:04	3b	0.006	0.009	0.009	91.8045	10200.5	61.203	91.8045	523.5	9.18045	11.4756	52.0225	72.6785
																																	23:17:01	2024-08-22 23:17:01	3b	0.005	0.009	0.009	91.8045	10200.5	51.0025	91.8045	523.5	9.18045	11.4756	41.822	62.478
																																	23:18:04	2024-08-22 23:18:04	3b	0.005	0.009	0.009	91.8045	10200.5	51.0025	91.8045	523.5	9.18045	11.4756	41.822	62.478
																																	23:19:01	2024-08-22 23:19:01	3b	0.006	0.009	0.009	91.8045	10200.5	61.203	91.8045	523.5	9.18045	11.4756	52.0225	72.6785
																																	23:19:51	2024-08-22 23:19:51	3b	0.005	0.009	0.009	91.8045	10200.5	51.0025	91.8045	523.5	9.18045	11.4756	41.822	62.478
																																								max	61.203
																																								mean	39.915
																																								min	20.401
																																								med	40.802
																																	21:43:04	2024-08-22 21:43:04								0	0
																																	21:43:15	2024-08-22 21:43:15	3c	0.002	0.004	0.0705	157.838	2238.84	4.47768	8.95536	54.8312	2.20753	2.27105	2.27015	6.74873
																																	21:43:49	2024-08-22 21:43:49	3c	0.006	0.006	0.0705	157.838	2238.84	13.433	13.433	82.2468	2.20753	2.27105	11.2255	15.7041
																																	21:44:22	2024-08-22 21:44:22	3c	0.004	0.008	0.0705	157.838	2238.84	8.95536	17.9107	109.662	2.20753	2.27105	6.74783	11.2264
																																	21:44:47	2024-08-22 21:44:47	3c	0.004	0.012	0.0705	157.838	2238.84	8.95536	26.8661	164.494	2.20753	2.27105	6.74783	11.2264
																																	21:45:20	2024-08-22 21:45:20	3c	0.012	0.014	0.0705	157.838	2238.84	26.8661	31.3438	191.909	2.20753	2.27105	24.6586	29.1371
																																	21:45:54	2024-08-22 21:45:54	3c	0.011	0.016	0.0705	157.838	2238.84	24.6272	35.8214	219.325	2.20753	2.27105	22.4197	26.8983
																																	21:46:26	2024-08-22 21:46:26	3c	0.01	0.019	0.0705	157.838	2238.84	22.3884	42.538	260.448	2.20753	2.27105	20.1809	24.6595
																																	21:47:02	2024-08-22 21:47:02	3c	0.012	0.023	0.0705	157.838	2238.84	26.8661	51.4933	315.279	2.20753	2.27105	24.6586	29.1371
																																	21:47:36	2024-08-22 21:47:36	3c	0.009	0.026	0.0705	157.838	2238.84	20.1496	58.2098	356.403	2.20753	2.27105	17.942	22.4206
																																	21:48:08	2024-08-22 21:48:08	3c	0.009	0.028	0.0705	157.838	2238.84	20.1496	62.6875	383.818	2.20753	2.27105	17.942	22.4206
																																	21:48:39	2024-08-22 21:48:39	3c	0.012	0.03	0.0705	157.838	2238.84	26.8661	67.1652	411.234	2.20753	2.27105	24.6586	29.1371
																													0.433333				21:49:13	2024-08-22 21:49:13	3c	0.012		0.0705	157.838	2238.84	26.8661	0	0	2.20753	2.27105	24.6586	29.1371
																													0.117692				21:49:47	2024-08-22 21:49:47	3c	0.008		0.0705	157.838	2238.84	17.9107	0	0	2.20753	2.27105	15.7032	20.1818
																																	21:50:21	2024-08-22 21:50:21	3c	0.008		0.0705	157.838	2238.84	17.9107	0	0	2.20753	2.27105	15.7032	20.1818
																																	21:50:56	2024-08-22 21:50:56	3c	0.01		0.0705	157.838	2238.84	22.3884	0	0	2.20753	2.27105	20.1809	24.6595
																													pre zoom length in new zoom			0.013	21:51:26	2024-08-22 21:51:26	3c	0.009		0.0705	157.838	2238.84	20.1496	0	0	2.20753	2.27105	17.942	22.4206
																																	21:51:59	2024-08-22 21:51:59	3c	0.019		0.0705	157.838	2238.84	42.538	0	0	2.20753	2.27105	40.3304	44.809
																																	21:52:59	2024-08-22 21:52:59	3c	0.021		0.0705	157.838	2238.84	47.0156	0	0	2.20753	2.27105	44.8081	49.2867
																																	21:54:10	2024-08-22 21:54:10	3c	0.018		0.0705	157.838	2238.84	40.2991	0	0	2.20753	2.27105	38.0916	42.5702
																														0.033			21:55:06	2024-08-22 21:55:06	3c	0.02		0.0705	157.838	2238.84	44.7768	0	0	2.20753	2.27105	42.5693	47.0479
																														0.07			21:56:01	2024-08-22 21:56:01	3c	0.02		0.0705	157.838	2238.84	44.7768	0	0	2.20753	2.27105	42.5693	47.0479
																																	21:57:06	2024-08-22 21:57:06	3c	0.018		0.0705	157.838	2238.84	40.2991	0	0	2.20753	2.27105	38.0916	42.5702
																																	21:58:08	2024-08-22 21:58:08	3c	0.02		0.0705	157.838	2238.84	44.7768	0	0	2.20753	2.27105	42.5693	47.0479
																																	21:59:06	2024-08-22 21:59:06	3c	0.018		0.0705	157.838	2238.84	40.2991	0	0	2.20753	2.27105	38.0916	42.5702	0.572254
																														0.471429			22:00:03	2024-08-22 22:00:03	3c	0.019		0.0705	157.838	2238.84	42.538	0	0	2.20753	2.27105	40.3304	44.809
																														0.110303			22:01:05	2024-08-22 22:01:05	3c	0.019		0.0705	157.838	2238.84	42.538	0	0	2.20753	2.27105	40.3304	44.809	0.215789
																																	22:02:05	2024-08-22 22:02:05	3c	0.018		0.0705	157.838	2238.84	40.2991	0	0	2.20753	2.27105	38.0916	42.5702
																																	22:03:01	2024-08-22 22:03:01	3c	0.02		0.0705	157.838	2238.84	44.7768	0	0	2.20753	2.27105	42.5693	47.0479
																																	22:03:50	2024-08-22 22:03:50	3c	0.01	0.038	0.03	157.838	5261.27	52.6127	199.928	1224.11	5.09156	5.4427	47.5212	58.0554
																																	22:03:56	2024-08-22 22:03:56	3c	0.01	0.038	0.03	157.838	5261.27	52.6127	199.928	1224.11	5.09156	5.4427	47.5212	58.0554
																																	22:04:03	2024-08-22 22:04:03	3c	0.01	0.039	0.03	157.838	5261.27	52.6127	205.19	1256.32	5.09156	5.4427	47.5212	58.0554
																																	22:04:11	2024-08-22 22:04:11	3c	0.01	0.039	0.03	157.838	5261.27	52.6127	205.19	1256.32	5.09156	5.4427	47.5212	58.0554
																																	22:04:19	2024-08-22 22:04:19	3c	0.01	0.04	0.03	157.838	5261.27	52.6127	210.451	1288.53	5.09156	5.4427	47.5212	58.0554
																																	22:04:29	2024-08-22 22:04:29	3c	0.009	0.04	0.03	157.838	5261.27	47.3515	210.451	1288.53	5.09156	5.4427	42.2599	52.7942
																																	22:04:41	2024-08-22 22:04:41	3c	0.009	0.041	0.03	157.838	5261.27	47.3515	215.712	1320.75	5.09156	5.4427	42.2599	52.7942
																																	22:04:55	2024-08-22 22:04:55	3c	0.011	0.042	0.03	157.838	5261.27	57.874	220.973	1352.96	5.09156	5.4427	52.7825	63.3167
																																	22:05:11	2024-08-22 22:05:11	3c	0.009	0.042	0.03	157.838	5261.27	47.3515	220.973	1352.96	5.09156	5.4427	42.2599	52.7942
																																	22:05:25	2024-08-22 22:05:25	3c	0.01	0.042	0.03	157.838	5261.27	52.6127	220.973	1352.96	5.09156	5.4427	47.5212	58.0554
																																	22:05:38	2024-08-22 22:05:38	3c	0.01	0.042	0.03	157.838	5261.27	52.6127	220.973	1352.96	5.09156	5.4427	47.5212	58.0554
																																	22:05:50	2024-08-22 22:05:50	3c	0.009	0.042	0.03	157.838	5261.27	47.3515	220.973	1352.96	5.09156	5.4427	42.2599	52.7942
																																	22:06:04	2024-08-22 22:06:04	3c	0.009	0.043	0.03	157.838	5261.27	47.3515	226.235	1385.17	5.09156	5.4427	42.2599	52.7942
																																	22:06:14	2024-08-22 22:06:14	3c	0.01	0.043	0.03	157.838	5261.27	52.6127	226.235	1385.17	5.09156	5.4427	47.5212	58.0554
																																	22:06:27	2024-08-22 22:06:27	3c	0.01	0.043	0.03	157.838	5261.27	52.6127	226.235	1385.17	5.09156	5.4427	47.5212	58.0554
																																	22:06:49	2024-08-22 22:06:49	3c	0.009	0.043	0.03	157.838	5261.27	47.3515	226.235	1385.17	5.09156	5.4427	42.2599	52.7942
																																	22:07:12	2024-08-22 22:07:12	3c	0.01	0.044	0.03	157.838	5261.27	52.6127	231.496	1417.39	5.09156	5.4427	47.5212	58.0554
																																	22:07:36	2024-08-22 22:07:36	3c	0.01	0.044	0.03	157.838	5261.27	52.6127	231.496	1417.39	5.09156	5.4427	47.5212	58.0554
																																	22:07:58	2024-08-22 22:07:58	3c	0.01	0.044	0.03	157.838	5261.27	52.6127	231.496	1417.39	5.09156	5.4427	47.5212	58.0554
																																	22:08:24	2024-08-22 22:08:24	3c	0.01	0.044	0.03	157.838	5261.27	52.6127	231.496	1417.39	5.09156	5.4427	47.5212	58.0554
																																	22:08:51	2024-08-22 22:08:51	3c	0.009	0.044	0.03	157.838	5261.27	47.3515	231.496	1417.39	5.09156	5.4427	42.2599	52.7942
																																	22:09:16	2024-08-22 22:09:16	3c	0.01	0.044	0.03	157.838	5261.27	52.6127	231.496	1417.39	5.09156	5.4427	47.5212	58.0554
																																	22:09:40	2024-08-22 22:09:40	3c	0.009	0.044	0.03	157.838	5261.27	47.3515	231.496	1417.39	5.09156	5.4427	42.2599	52.7942
																																	22:10:04	2024-08-22 22:10:04	3c	0.009	0.044	0.03	157.838	5261.27	47.3515	231.496	1417.39	5.09156	5.4427	42.2599	52.7942
																																	22:10:27	2024-08-22 22:10:27	3c	0.01	0.044	0.03	157.838	5261.27	52.6127	231.496	1417.39	5.09156	5.4427	47.5212	58.0554
																																	22:10:50	2024-08-22 22:10:50	3c	0.009	0.044	0.03	157.838	5261.27	47.3515	231.496	1417.39	5.09156	5.4427	42.2599	52.7942
																																	22:11:13	2024-08-22 22:11:13	3c	0.009	0.044	0.03	157.838	5261.27	47.3515	231.496	1417.39	5.09156	5.4427	42.2599	52.7942
																																	22:11:30	2024-08-22 22:11:30	3c	0.01	0.044	0.03	157.838	5261.27	52.6127	231.496	1417.39	5.09156	5.4427	47.5212	58.0554
																																	22:11:54	2024-08-22 22:11:54	3c	0.01	0.044	0.03	157.838	5261.27	52.6127	231.496	1417.39	5.09156	5.4427	47.5212	58.0554
																																	22:12:18	2024-08-22 22:12:18	3c	0.009	0.044	0.03	157.838	5261.27	47.3515	231.496	1417.39	5.09156	5.4427	42.2599	52.7942
																																	22:12:38	2024-08-22 22:12:38	3c	0.011	0.044	0.03	157.838	5261.27	57.874	231.496	1417.39	5.09156	5.4427	52.7825	63.3167
																																	22:13:01	2024-08-22 22:13:01	3c	0.011	0.045	0.03	157.838	5261.27	57.874	236.757	1449.6	5.09156	5.4427	52.7825	63.3167
																																	22:13:25	2024-08-22 22:13:25	3c	0.01	0.045	0.03	157.838	5261.27	52.6127	236.757	1449.6	5.09156	5.4427	47.5212	58.0554
																																	22:13:48	2024-08-22 22:13:48	3c	0.011	0.045	0.03	157.838	5261.27	57.874	236.757	1449.6	5.09156	5.4427	52.7825	63.3167
																																	22:14:11	2024-08-22 22:14:11	3c	0.01	0.046	0.03	157.838	5261.27	52.6127	242.019	1481.81	5.09156	5.4427	47.5212	58.0554
																																	22:14:26	2024-08-22 22:14:26	3c	0.012	0.046	0.03	157.838	5261.27	63.1353	242.019	1481.81	5.09156	5.4427	58.0437	68.578
																																	22:14:48	2024-08-22 22:14:48	3c	0.011	0.046	0.03	157.838	5261.27	57.874	242.019	1481.81	5.09156	5.4427	52.7825	63.3167
																																	22:15:08	2024-08-22 22:15:08	3c	0.013	0.046	0.03	157.838	5261.27	68.3966	242.019	1481.81	5.09156	5.4427	63.305	73.8393
																																	22:15:33	2024-08-22 22:15:33	3c	0.01	0.047	0.03	157.838	5261.27	52.6127	247.28	1514.03	5.09156	5.4427	47.5212	58.0554
																																	22:15:55	2024-08-22 22:15:55	3c	0.011	0.047	0.03	157.838	5261.27	57.874	247.28	1514.03	5.09156	5.4427	52.7825	63.3167
																																	22:16:17	2024-08-22 22:16:17	3c	0.011	0.047	0.03	157.838	5261.27	57.874	247.28	1514.03	5.09156	5.4427	52.7825	63.3167
																																	22:16:34	2024-08-22 22:16:34	3c	0.012	0.048	0.03	157.838	5261.27	63.1353	252.541	1546.24	5.09156	5.4427	58.0437	68.578
																																	22:16:57	2024-08-22 22:16:57	3c	0.011	0.048	0.03	157.838	5261.27	57.874	252.541	1546.24	5.09156	5.4427	52.7825	63.3167
																																	22:18:00	2024-08-22 22:18:00	3c	0.013	0.048	0.03	157.838	5261.27	68.3966	252.541	1546.24	5.09156	5.4427	63.305	73.8393
																																	22:19:02	2024-08-22 22:19:02	3c	0.011	0.049	0.03	157.838	5261.27	57.874	257.802	1578.45	5.09156	5.4427	52.7825	63.3167
																																	22:20:00	2024-08-22 22:20:00	3c	0.012	0.049	0.03	157.838	5261.27	63.1353	257.802	1578.45	5.09156	5.4427	58.0437	68.578
																																	22:21:00	2024-08-22 22:21:00	3c	0.011	0.05	0.03	157.838	5261.27	57.874	263.064	1610.67	5.09156	5.4427	52.7825	63.3167
																																	22:22:01	2024-08-22 22:22:01	3c	0.01	0.05	0.03	157.838	5261.27	52.6127	263.064	1610.67	5.09156	5.4427	47.5212	58.0554
																																	22:23:02	2024-08-22 22:23:02	3c	0.012	0.05	0.03	157.838	5261.27	63.1353	263.064	1610.67	5.09156	5.4427	58.0437	68.578
																																	22:23:59	2024-08-22 22:23:59	3c	0.013	0.051	0.03	157.838	5261.27	68.3966	268.325	1642.88	5.09156	5.4427	63.305	73.8393
																																	22:25:06	2024-08-22 22:25:06	3c	0.01	0.051	0.03	157.838	5261.27	52.6127	268.325	1642.88	5.09156	5.4427	47.5212	58.0554
																																	22:25:59	2024-08-22 22:25:59	3c	0.014	0.051	0.03	157.838	5261.27	73.6578	268.325	1642.88	5.09156	5.4427	68.5663	79.1005
																																	22:26:58	2024-08-22 22:26:58	3c	0.012	0.051	0.03	157.838	5261.27	63.1353	268.325	1642.88	5.09156	5.4427	58.0437	68.578
																																	22:27:57	2024-08-22 22:27:57	3c	0.012	0.051	0.03	157.838	5261.27	63.1353	268.325	1642.88	5.09156	5.4427	58.0437	68.578
																																	22:29:00	2024-08-22 22:29:00	3c	0.013	0.051	0.03	157.838	5261.27	68.3966	268.325	1642.88	5.09156	5.4427	63.305	73.8393
																																	22:29:59	2024-08-22 22:29:59	3c	0.011	0.051	0.03	157.838	5261.27	57.874	268.325	1642.88	5.09156	5.4427	52.7825	63.3167
																																	22:31:02	2024-08-22 22:31:02	3c	0.013	0.051	0.03	157.838	5261.27	68.3966	268.325	1642.88	5.09156	5.4427	63.305	73.8393
																																	22:32:01	2024-08-22 22:32:01	3c	0.011	0.051	0.03	157.838	5261.27	57.874	268.325	1642.88	5.09156	5.4427	52.7825	63.3167
																																	22:32:57	2024-08-22 22:32:57	3c	0.011	0.051	0.03	157.838	5261.27	57.874	268.325	1642.88	5.09156	5.4427	52.7825	63.3167
																																	22:34:00	2024-08-22 22:34:00	3c	0.012	0.051	0.03	157.838	5261.27	63.1353	268.325	1642.88	5.09156	5.4427	58.0437	68.578
																																	22:34:59	2024-08-22 22:34:59	3c	0.011	0.051	0.03	157.838	5261.27	57.874	268.325	1642.88	5.09156	5.4427	52.7825	63.3167
																																	22:35:22	2024-08-22 22:35:22	3c	0.012	0.051	0.03	157.838	5261.27	63.1353	268.325	1642.88	5.09156	5.4427	58.0437	68.578
																																	22:35:33	2024-08-22 22:35:33	3c	0.012	0.051	0.03	157.838	5261.27	63.1353	268.325	1642.88	5.09156	5.4427	58.0437	68.578
																																	22:36:00	2024-08-22 22:36:00	3c	0.011	0.051	0.03	157.838	5261.27	57.874	268.325	1642.88	5.09156	5.4427	52.7825	63.3167
																																	22:36:40	2024-08-22 22:36:40	3c	0.011	0.051	0.03	157.838	5261.27	57.874	268.325	1642.88	5.09156	5.4427	52.7825	63.3167
																																	22:37:05	2024-08-22 22:37:05	3c	0.01	0.051	0.03	157.838	5261.27	52.6127	268.325	1642.88	5.09156	5.4427	47.5212	58.0554
																																	22:37:33	2024-08-22 22:37:33	3c	0.012	0.051	0.03	157.838	5261.27	63.1353	268.325	1642.88	5.09156	5.4427	58.0437	68.578
																																	22:38:07	2024-08-22 22:38:07	3c	0.011	0.051	0.03	157.838	5261.27	57.874	268.325	1642.88	5.09156	5.4427	52.7825	63.3167
																																	22:39:07	2024-08-22 22:39:07	3c	0.01	0.051	0.03	157.838	5261.27	52.6127	268.325	1642.88	5.09156	5.4427	47.5212	58.0554
																																	22:39:44	2024-08-22 22:39:44	3c	0.011	0.051	0.03	157.838	5261.27	57.874	268.325	1642.88	5.09156	5.4427	52.7825	63.3167
																																	22:40:30	2024-08-22 22:40:30	3c	0.011	0.051	0.03	157.838	5261.27	57.874	268.325	1642.88	5.09156	5.4427	52.7825	63.3167
																																	22:41:03	2024-08-22 22:41:03	3c	0.011	0.051	0.03	157.838	5261.27	57.874	268.325	1642.88	5.09156	5.4427	52.7825	63.3167
																																	22:42:01	2024-08-22 22:42:01	3c	0.012	0.051	0.03	157.838	5261.27	63.1353	268.325	1642.88	5.09156	5.4427	58.0437	68.578
																																	22:43:05	2024-08-22 22:43:05	3c	0.012	0.051	0.03	157.838	5261.27	63.1353	268.325	1642.88	5.09156	5.4427	58.0437	68.578
																																	22:44:03	2024-08-22 22:44:03	3c	0.012	0.051	0.03	157.838	5261.27	63.1353	268.325	1642.88	5.09156	5.4427	58.0437	68.578
																																	22:45:05	2024-08-22 22:45:05	3c	0.013	0.051	0.03	157.838	5261.27	68.3966	268.325	1642.88	5.09156	5.4427	63.305	73.8393
																																	22:46:03	2024-08-22 22:46:03	3c	0.013	0.051	0.03	157.838	5261.27	68.3966	268.325	1642.88	5.09156	5.4427	63.305	73.8393
																																	22:47:02	2024-08-22 22:47:02	3c	0.013	0.051	0.03	157.838	5261.27	68.3966	268.325	1642.88	5.09156	5.4427	63.305	73.8393
																																	22:48:04	2024-08-22 22:48:04	3c	0.014	0.051	0.03	157.838	5261.27	73.6578	268.325	1642.88	5.09156	5.4427	68.5663	79.1005
																																	22:49:05	2024-08-22 22:49:05	3c	0.014	0.051	0.03	157.838	5261.27	73.6578	268.325	1642.88	5.09156	5.4427	68.5663	79.1005
																																	22:50:04	2024-08-22 22:50:04	3c	0.014	0.051	0.03	157.838	5261.27	73.6578	268.325	1642.88	5.09156	5.4427	68.5663	79.1005
																																	22:51:02	2024-08-22 22:51:02	3c	0.015	0.051	0.03	157.838	5261.27	78.9191	268.325	1642.88	5.09156	5.4427	73.8275	84.3618
																																	22:52:06	2024-08-22 22:52:06	3c	0.014	0.051	0.03	157.838	5261.27	73.6578	268.325	1642.88	5.09156	5.4427	68.5663	79.1005
																																	22:53:09	2024-08-22 22:53:09	3c	0.014	0.051	0.03	157.838	5261.27	73.6578	268.325	1642.88	5.09156	5.4427	68.5663	79.1005
																																	22:54:02	2024-08-22 22:54:02	3c	0.016	0.051	0.03	157.838	5261.27	84.1804	268.325	1642.88	5.09156	5.4427	79.0888	89.6231
																																	22:54:52	2024-08-22 22:54:52	3c	0.017	0.051	0.03	157.838	5261.27	89.4417	268.325	1642.88	5.09156	5.4427	84.3501	94.8843
																																	22:56:02	2024-08-22 22:56:02	3c	0.018	0.051	0.03	157.838	5261.27	94.7029	268.325	1642.88	5.09156	5.4427	89.6114	100.146
																																	22:57:02	2024-08-22 22:57:02	3c	0.017	0.051	0.03	157.838	5261.27	89.4417	268.325	1642.88	5.09156	5.4427	84.3501	94.8843
																																	22:58:04	2024-08-22 22:58:04	3c	0.018	0.051	0.03	157.838	5261.27	94.7029	268.325	1642.88	5.09156	5.4427	89.6114	100.146
																																	22:59:06	2024-08-22 22:59:06	3c	0.019	0.051	0.03	157.838	5261.27	99.9642	268.325	1642.88	5.09156	5.4427	94.8726	105.407
																																	23:00:02	2024-08-22 23:00:02	3c	0.02	0.051	0.03	157.838	5261.27	105.225	268.325	1642.88	5.09156	5.4427	100.134	110.668
																																	23:01:06	2024-08-22 23:01:06	3c	0.021	0.051	0.03	157.838	5261.27	110.487	268.325	1642.88	5.09156	5.4427	105.395	115.929
																																	23:02:03	2024-08-22 23:02:03	3c	0.021	0.051	0.03	157.838	5261.27	110.487	268.325	1642.88	5.09156	5.4427	105.395	115.929
																																	23:03:06	2024-08-22 23:03:06	3c	0.021	0.051	0.03	157.838	5261.27	110.487	268.325	1642.88	5.09156	5.4427	105.395	115.929
																																	23:04:04	2024-08-22 23:04:04	3c	0.021	0.051	0.03	157.838	5261.27	110.487	268.325	1642.88	5.09156	5.4427	105.395	115.929
																																	23:05:06	2024-08-22 23:05:06	3c	0.021	0.051	0.03	157.838	5261.27	110.487	268.325	1642.88	5.09156	5.4427	105.395	115.929
																																	23:06:01	2024-08-22 23:06:01	3c	0.022	0.051	0.03	157.838	5261.27	115.748	268.325	1642.88	5.09156	5.4427	110.656	121.191
																																	23:07:03	2024-08-22 23:07:03	3c	0.022	0.051	0.03	157.838	5261.27	115.748	268.325	1642.88	5.09156	5.4427	110.656	121.191
																																	23:08:01	2024-08-22 23:08:01	3c	0.023	0.051	0.03	157.838	5261.27	121.009	268.325	1642.88	5.09156	5.4427	115.918	126.452
																																	23:09:07	2024-08-22 23:09:07	3c	0.022	0.051	0.03	157.838	5261.27	115.748	268.325	1642.88	5.09156	5.4427	110.656	121.191
																																	23:10:06	2024-08-22 23:10:06	3c	0.023	0.051	0.03	157.838	5261.27	121.009	268.325	1642.88	5.09156	5.4427	115.918	126.452
																																	23:11:03	2024-08-22 23:11:03	3c	0.024	0.051	0.03	157.838	5261.27	126.271	268.325	1642.88	5.09156	5.4427	121.179	131.713
																																	23:12:06	2024-08-22 23:12:06	3c	0.022	0.051	0.03	157.838	5261.27	115.748	268.325	1642.88	5.09156	5.4427	110.656	121.191
																																	23:13:06	2024-08-22 23:13:06	3c	0.023	0.051	0.03	157.838	5261.27	121.009	268.325	1642.88	5.09156	5.4427	115.918	126.452
																																	23:14:06	2024-08-22 23:14:06	3c	0.022	0.051	0.03	157.838	5261.27	115.748	268.325	1642.88	5.09156	5.4427	110.656	121.191
																																	23:15:04	2024-08-22 23:15:04	3c	0.021	0.051	0.03	157.838	5261.27	110.487	268.325	1642.88	5.09156	5.4427	105.395	115.929
																																	23:16:04	2024-08-22 23:16:04	3c	0.021	0.051	0.03	157.838	5261.27	110.487	268.325	1642.88	5.09156	5.4427	105.395	115.929
																																	23:17:01	2024-08-22 23:17:01	3c	0.022	0.051	0.03	157.838	5261.27	115.748	268.325	1642.88	5.09156	5.4427	110.656	121.191
																																	23:18:04	2024-08-22 23:18:04	3c	0.022	0.051	0.03	157.838	5261.27	115.748	268.325	1642.88	5.09156	5.4427	110.656	121.191
																																	23:19:01	2024-08-22 23:19:01	3c	0.021	0.051	0.03	157.838	5261.27	110.487	268.325	1642.88	5.09156	5.4427	105.395	115.929
																																	23:19:51	2024-08-22 23:19:51	3c	0.021	0.051	0.03	157.838	5261.27	110.487	268.325	1642.88	5.09156	5.4427	105.395	115.929
																																								max	126.271
																																								mean	62.2494
																																								med	57.874
																																								min	4.47768

## Sheet: DECEMBER ANGULAR UNCERTAINTY
FISSURE 1 TAKING THE ANGLE FROM THE NORTHERN TIP OF THE POTENTIAL WEBCAM AREA														FISSURE 1 TAKING THE ANGLE FROM THE SOUTHERN TIP OF THE POTENTIAL WEBCAM AREA																								FISSURE 2 TAKING THE ANGLE FROM THE NORTHERN TIP OF THE POTENTIAL WEBCAM AREA
Time	Time and date	Fissure	Fire fountain height on screen (m)	Fissure length on screen at time (m)	Total fissure length on screen (m)	Real apparent fissure length (m)	Scaling factor	Real fire fountain height (m)	Positive uncertainty	Negative uncertainty	Lower bound	Upper bound		Time	Time and date	Fissure	Fire fountain height on screen (m)	Fissure length on screen at time (m)	Total fissure length on screen (m)	Real apparent fissure length (m)	Scaling factor	Real fire fountain height (m)	Positive uncertainty	Negative uncertainty	Lower bound	Upper bound		Fire fountain height	Upper Bound with angular uncertainty	Lower Bound with angular uncertainty	upper bound from just ruler uncertainty	lower bound from just ruler uncertainty	Upper difference	lower difference				Time	Time and date	Fissure	Fire fountain height on screen (m)	Fissure length on screen at time (m)	Total fissure length on screen (m)	Real apparent fissure length (m)	Scaling factor	Real fire fountain height (m)	Positive uncertainty	Negative uncertainty	Lower bound
22:58:26	2023-12-18 22:58:26	1a	0.001	0.001	0.011	38.439	3494.45	10.4834	3.20325	3.8439	7.28011	14.3273		22:58:26	2023-12-18 22:58:26	1a	0.001	0.001	0.011	31.2995	2845.41	8.53622	2.60829	3.12995	5.92793	11.6662		9.37227	14.3273	5.92793	12.8088	6.50852	1.51849	0.580586				22:17:18
22:59:02	2023-12-18 22:59:02	1a	0.002	0.002	0.011	38.439	3494.45	13.9778	3.20325	3.8439	10.7746	17.8217		22:59:02	2023-12-18 22:59:02	1a	0.002	0.002	0.011	31.2995	2845.41	11.3816	2.60829	3.12995	8.77334	14.5116		12.4964	17.8217	8.77334	15.9329	9.63261	1.88886	0.859267				22:23:47	2023-12-18 22:23:47	2a	0.011	0.01	0.015	36.959	2463.93	27.1033	2.30994	2.63993	24.7933
22:59:36	2023-12-18 22:59:36	1a	0.002	0.002	0.011	38.439	3494.45	10.4834	3.20325	3.8439	7.28011	14.3273		22:59:36	2023-12-18 22:59:36	1a	0.002	0.002	0.011	31.2995	2845.41	8.53622	2.60829	3.12995	5.92793	11.6662		9.37227	14.3273	5.92793	12.8088	6.50852	1.51849	0.580586				22:23:59	2023-12-18 22:23:59	2a	0.011	0.01	0.015	36.959	2463.93	27.1033	2.30994	2.63993	24.7933
23:00:06	2023-12-18 23:00:06	1a	0.002	0.002	0.011	38.439	3494.45	6.98891	3.20325	3.8439	3.78566	10.8328		23:00:06	2023-12-18 23:00:06	1a	0.002	0.002	0.011	31.2995	2845.41	5.69081	2.60829	3.12995	3.08252	8.82076		6.24818	10.8328	3.08252	9.68467	3.38443	1.14813	0.301905				22:24:11	2023-12-18 22:24:11	2a	0.011	0.012	0.015	36.959	2463.93	27.1033	2.30994	2.63993	24.7933
23:03:34	2023-12-18 23:03:34	1a	0.002	0.003	0.011	38.439	3494.45	6.98891	3.20325	3.8439	3.78566	10.8328		23:03:34	2023-12-18 23:03:34	1a	0.002	0.003	0.011	31.2995	2845.41	5.69081	2.60829	3.12995	3.08252	8.82076		6.24818	10.8328	3.08252	9.68467	3.38443	1.14813	0.301905				22:24:24	2023-12-18 22:24:24	2a	0.01	0.012	0.015	36.959	2463.93	24.6393	2.30994	2.63993	22.3294
23:05:02	2023-12-18 23:05:02	1a	0.003	0.003	0.011	38.439	3494.45	10.4834	3.20325	3.8439	7.28011	14.3273		23:05:02	2023-12-18 23:05:02	1a	0.003	0.003	0.011	31.2995	2845.41	8.53622	2.60829	3.12995	5.92793	11.6662		9.37227	14.3273	5.92793	12.8088	6.50852	1.51849	0.580586				22:24:36	2023-12-18 22:24:36	2a	0.009	0.012	0.015	36.959	2463.93	22.1754	2.30994	2.63993	19.8655
23:10:06	2023-12-18 23:10:06	1a	0.003	0.005	0.011	38.439	3494.45	10.4834	3.20325	3.8439	7.28011	14.3273		23:10:06	2023-12-18 23:10:06	1a	0.003	0.005	0.011	31.2995	2845.41	8.53622	2.60829	3.12995	5.92793	11.6662		9.37227	14.3273	5.92793	12.8088	6.50852	1.51849	0.580586				22:24:48	2023-12-18 22:24:48	2a	0.01	0.012	0.015	36.959	2463.93	24.6393	2.30994	2.63993	22.3294
23:15:04	2023-12-18 23:15:04	1a	0.003	0.005	0.011	38.439	3494.45	10.4834	3.20325	3.8439	7.28011	14.3273		23:15:04	2023-12-18 23:15:04	1a	0.003	0.005	0.011	31.2995	2845.41	8.53622	2.60829	3.12995	5.92793	11.6662		9.37227	14.3273	5.92793	12.8088	6.50852	1.51849	0.580586				22:24:58	2023-12-18 22:24:58	2a	0.011	0.012	0.015	36.959	2463.93	27.1033	2.30994	2.63993	24.7933
23:20:07	2023-12-18 23:20:07	1a	0.003	0.006	0.011	38.439	3494.45	10.4834	3.20325	3.8439	7.28011	14.3273		23:20:07	2023-12-18 23:20:07	1a	0.003	0.006	0.011	31.2995	2845.41	8.53622	2.60829	3.12995	5.92793	11.6662		9.37227	14.3273	5.92793	12.8088	6.50852	1.51849	0.580586				22:25:30	2023-12-18 22:25:30	2a	0.011	0.012	0.015	36.959	2463.93	27.1033	2.30994	2.63993	24.7933
23:25:11	2023-12-18 23:25:11	1a	0.005	0.009	0.011	38.439	3494.45	17.4723	3.20325	3.8439	14.269	21.3162		23:25:11	2023-12-18 23:25:11	1a	0.005	0.009	0.011	31.2995	2845.41	14.227	2.60829	3.12995	11.6187	17.357		15.6204	21.3162	11.6187	19.0569	12.7567	2.25922	1.13795				22:25:58	2023-12-18 22:25:58	2a	0.009	0.015	0.015	36.959	2463.93	22.1754	2.30994	2.63993	19.8655
23:30:03	2023-12-18 23:30:03	1a	0.005	0.011	0.011	38.439	3494.45	17.4723	3.20325	3.8439	14.269	21.3162		23:30:03	2023-12-18 23:30:03	1a	0.005	0.011	0.011	31.2995	2845.41	14.227	2.60829	3.12995	11.6187	17.357		15.6204	21.3162	11.6187	19.0569	12.7567	2.25922	1.13795				22:26:35	2023-12-18 22:26:35	2a	0.01	0.015	0.015	36.959	2463.93	24.6393	2.30994	2.63993	22.3294
23:35:07	2023-12-18 23:35:07	1a	0.004	0.011	0.011	38.439	3494.45	13.9778	3.20325	3.8439	10.7746	17.8217		23:35:07	2023-12-18 23:35:07	1a	0.004	0.011	0.011	31.2995	2845.41	11.3816	2.60829	3.12995	8.77334	14.5116		12.4964	17.8217	8.77334	15.9329	9.63261	1.88886	0.859267				22:26:52	2023-12-18 22:26:52	2a	0.011	0.015	0.015	36.959	2463.93	27.1033	2.30994	2.63993	24.7933
23:40:11	2023-12-18 23:40:11	1a	0.005	0.011	0.011	38.439	3494.45	17.4723	3.20325	3.8439	14.269	21.3162		23:40:11	2023-12-18 23:40:11	1a	0.005	0.011	0.011	31.2995	2845.41	14.227	2.60829	3.12995	11.6187	17.357		15.6204	21.3162	11.6187	19.0569	12.7567	2.25922	1.13795				22:27:12	2023-12-18 22:27:12	2a	0.011	0.015	0.015	36.959	2463.93	27.1033	2.30994	2.63993	24.7933
23:45:06	2023-12-18 23:45:06	1a	0.005	0.011	0.011	38.439	3494.45	17.4723	3.20325	3.8439	14.269	21.3162		23:45:06	2023-12-18 23:45:06	1a	0.005	0.011	0.011	31.2995	2845.41	14.227	2.60829	3.12995	11.6187	17.357		15.6204	21.3162	11.6187	19.0569	12.7567	2.25922	1.13795				22:27:28	2023-12-18 22:27:28	2a	0.012	0.015	0.015	36.959	2463.93	29.5672	2.30994	2.63993	27.2572
23:50:11	2023-12-18 23:50:11	1a	0.004	0.011	0.011	38.439	3494.45	13.9778	3.20325	3.8439	10.7746	17.8217		23:50:11	2023-12-18 23:50:11	1a	0.004	0.011	0.011	31.2995	2845.41	11.3816	2.60829	3.12995	8.77334	14.5116		12.4964	17.8217	8.77334	15.9329	9.63261	1.88886	0.859267				22:27:56	2023-12-18 22:27:56	2a	0.011	0.015	0.015	36.959	2463.93	27.1033	2.30994	2.63993	24.7933
23:55:04	2023-12-18 23:55:04	1a	0.002	0.011	0.011	38.439	3494.45	6.98891	3.20325	3.8439	3.78566	10.8328		23:55:04	2023-12-18 23:55:04	1a	0.002	0.011	0.011	31.2995	2845.41	5.69081	2.60829	3.12995	3.08252	8.82076		6.24818	10.8328	3.08252	9.68467	3.38443	1.14813	0.301905				22:28:31	2023-12-18 22:28:31	2a	0.012	0.015	0.015	36.959	2463.93	29.5672	2.30994	2.63993	27.2572
00:00:08	2023-12-19 00:00:08	1a	0.002	0.011	0.011	38.439	3494.45	6.98891	3.20325	3.8439	3.78566	10.8328		00:00:08	2023-12-19 00:00:08	1a	0.002	0.011	0.011	31.2995	2845.41	5.69081	2.60829	3.12995	3.08252	8.82076		6.24818	10.8328	3.08252	9.68467	3.38443	1.14813	0.301905				22:29:01	2023-12-18 22:29:01	2a	0.013	0.015	0.015	36.959	2463.93	32.0311	2.30994	2.63993	29.7212
00:05:11	2023-12-19 00:05:11	1a	0.004	0.011	0.011	38.439	3494.45	13.9778	3.20325	3.8439	10.7746	17.8217		00:05:11	2023-12-19 00:05:11	1a	0.004	0.011	0.011	31.2995	2845.41	11.3816	2.60829	3.12995	8.77334	14.5116		12.4964	17.8217	8.77334	15.9329	9.63261	1.88886	0.859267				22:29:53	2023-12-18 22:29:53	2a	0.014	0.015	0.015	36.959	2463.93	34.495	2.30994	2.63993	32.1851
00:10:06	2023-12-19 00:10:06	1a	0.002	0.011	0.011	38.439	3494.45	6.98891	3.20325	3.8439	3.78566	10.8328		00:10:06	2023-12-19 00:10:06	1a	0.002	0.011	0.011	31.2995	2845.41	5.69081	2.60829	3.12995	3.08252	8.82076		6.24818	10.8328	3.08252	9.68467	3.38443	1.14813	0.301905				22:30:57	2023-12-18 22:30:57	2a	0.012	0.015	0.015	36.959	2463.93	29.5672	2.30994	2.63993	27.2572
00:15:09	2023-12-19 00:15:09	1a	0.002	0.011	0.011	38.439	3494.45	6.98891	3.20325	3.8439	3.78566	10.8328		00:15:09	2023-12-19 00:15:09	1a	0.002	0.011	0.011	31.2995	2845.41	5.69081	2.60829	3.12995	3.08252	8.82076		6.24818	10.8328	3.08252	9.68467	3.38443	1.14813	0.301905				22:31:29	2023-12-18 22:31:29	2a	0.014	0.015	0.015	36.959	2463.93	34.495	2.30994	2.63993	32.1851
00:20:06	2023-12-19 00:20:06	1a	0.002	0.011	0.011	38.439	3494.45	6.98891	3.20325	3.8439	3.78566	10.8328		00:20:06	2023-12-19 00:20:06	1a	0.002	0.011	0.011	31.2995	2845.41	5.69081	2.60829	3.12995	3.08252	8.82076		6.24818	10.8328	3.08252	9.68467	3.38443	1.14813	0.301905				22:32:01	2023-12-18 22:32:01	2a	0.014	0.015	0.015	36.959	2463.93	34.495	2.30994	2.63993	32.1851
00:25:11	2023-12-19 00:25:11	1a	0.004	0.011	0.011	38.439	3494.45	13.9778	3.20325	3.8439	10.7746	17.8217		00:25:11	2023-12-19 00:25:11	1a	0.004	0.011	0.011	31.2995	2845.41	11.3816	2.60829	3.12995	8.77334	14.5116		12.4964	17.8217	8.77334	15.9329	9.63261	1.88886	0.859267				22:32:34	2023-12-18 22:32:34	2a	0.012	0.015	0.015	36.959	2463.93	29.5672	2.30994	2.63993	27.2572
00:30:08	2023-12-19 00:30:08	1a	0.003	0.011	0.011	38.439	3494.45	10.4834	3.20325	3.8439	7.28011	14.3273		00:30:08	2023-12-19 00:30:08	1a	0.003	0.011	0.011	31.2995	2845.41	8.53622	2.60829	3.12995	5.92793	11.6662		9.37227	14.3273	5.92793	12.8088	6.50852	1.51849	0.580586				22:33:07	2023-12-18 22:33:07	2a	0.011	0.015	0.015	36.959	2463.93	27.1033	2.30994	2.63993	24.7933
00:35:06	2023-12-19 00:35:06	1a	0.003	0.011	0.011	38.439	3494.45	10.4834	3.20325	3.8439	7.28011	14.3273		00:35:06	2023-12-19 00:35:06	1a	0.003	0.011	0.011	31.2995	2845.41	8.53622	2.60829	3.12995	5.92793	11.6662		9.37227	14.3273	5.92793	12.8088	6.50852	1.51849	0.580586				22:33:29	2023-12-18 22:33:29	2a	0.013	0.015	0.015	36.959	2463.93	32.0311	2.30994	2.63993	29.7212
00:40:07	2023-12-19 00:40:07	1a	0.003	0.011	0.011	38.439	3494.45	10.4834	3.20325	3.8439	7.28011	14.3273		00:40:07	2023-12-19 00:40:07	1a	0.003	0.011	0.011	31.2995	2845.41	8.53622	2.60829	3.12995	5.92793	11.6662		9.37227	14.3273	5.92793	12.8088	6.50852	1.51849	0.580586				22:34:11	2023-12-18 22:34:11	2a	0.014	0.015	0.015	36.959	2463.93	34.495	2.30994	2.63993	32.1851
00:45:10	2023-12-19 00:45:10	1a	0.002	0.011	0.011	38.439	3494.45	6.98891	3.20325	3.8439	3.78566	10.8328		00:45:10	2023-12-19 00:45:10	1a	0.002	0.011	0.011	31.2995	2845.41	5.69081	2.60829	3.12995	3.08252	8.82076		6.24818	10.8328	3.08252	9.68467	3.38443	1.14813	0.301905				22:35:13	2023-12-18 22:35:13	2a	0.013	0.015	0.015	36.959	2463.93	32.0311	2.30994	2.63993	29.7212
00:50:05	2023-12-19 00:50:05	1a	0.003	0.011	0.011	38.439	3494.45	10.4834	3.20325	3.8439	7.28011	14.3273		00:50:05	2023-12-19 00:50:05	1a	0.003	0.011	0.011	31.2995	2845.41	8.53622	2.60829	3.12995	5.92793	11.6662		9.37227	14.3273	5.92793	12.8088	6.50852	1.51849	0.580586				22:36:21	2023-12-18 22:36:21	2a	0.011	0.015	0.015	36.959	2463.93	27.1033	2.30994	2.63993	24.7933
00:55:10	2023-12-19 00:55:10	1a	0.003	0.011	0.011	38.439	3494.45	10.4834	3.20325	3.8439	7.28011	14.3273		00:55:10	2023-12-19 00:55:10	1a	0.003	0.011	0.011	31.2995	2845.41	8.53622	2.60829	3.12995	5.92793	11.6662		9.37227	14.3273	5.92793	12.8088	6.50852	1.51849	0.580586				22:37:16	2023-12-18 22:37:16	2a	0.013	0.015	0.015	36.959	2463.93	32.0311	2.30994	2.63993	29.7212
22:37:10														22:37:10															0	0			0	0				22:38:30	2023-12-18 22:38:30	2a	0.01	0.015	0.015	36.959	2463.93	24.6393	2.30994	2.63993	22.3294
22:37:40	2023-12-18 22:37:40	1b	0.003	0.002	0.003	8.54624	2848.75	8.54624	2.13656	4.27312	6.40968	12.8194		22:37:40	2023-12-18 22:37:40	1b	0.003	0.002	0.003	6.39598	2131.99	6.39598	1.599	3.19799	4.79699	9.59397		7.86328	12.8194	4.79699	11.7949	5.89746	1.02443	1.10047				22:39:35	2023-12-18 22:39:35	2a	0.011	0.015	0.015	36.959	2463.93	27.1033	2.30994	2.63993	24.7933
22:37:48	2023-12-18 22:37:48	1b	0.004	0.002	0.003	8.54624	2848.75	11.395	2.13656	4.27312	9.25842	15.6681		22:37:48	2023-12-18 22:37:48	1b	0.004	0.002	0.003	6.39598	2131.99	8.52798	1.599	3.19799	6.92898	11.726		10.4844	15.6681	6.92898	14.416	8.51855	1.25209	1.58957				22:41:57	2023-12-18 22:41:57	2a	0.011	0.015	0.015	36.959	2463.93	27.1033	2.30994	2.63993	24.7933
22:37:55	2023-12-18 22:37:55	1b	0.003	0.002	0.003	8.54624	2848.75	8.54624	2.13656	4.27312	6.40968	12.8194		22:37:55	2023-12-18 22:37:55	1b	0.003	0.002	0.003	6.39598	2131.99	6.39598	1.599	3.19799	4.79699	9.59397		7.86328	12.8194	4.79699	11.7949	5.89746	1.02443	1.10047				22:45:04	2023-12-18 22:45:04	2a	0.009	0.015	0.015	36.959	2463.93	22.1754	2.30994	2.63993	19.8655
22:38:30	2023-12-18 22:38:30	1b	0.004	0.002	0.003	8.54624	2848.75	11.395	2.13656	4.27312	9.25842	15.6681		22:38:30	2023-12-18 22:38:30	1b	0.004	0.002	0.003	6.39598	2131.99	8.52798	1.599	3.19799	6.92898	11.726		10.4844	15.6681	6.92898	14.416	8.51855	1.25209	1.58957				22:47:38	2023-12-18 22:47:38	2a	0.012	0.015	0.015	36.959	2463.93	29.5672	2.30994	2.63993	27.2572
22:39:02	2023-12-18 22:39:02	1b	0.004	0.002	0.003	8.54624	2848.75	11.395	2.13656	4.27312	9.25842	15.6681		22:39:02	2023-12-18 22:39:02	1b	0.004	0.002	0.003	6.39598	2131.99	8.52798	1.599	3.19799	6.92898	11.726		10.4844	15.6681	6.92898	14.416	8.51855	1.25209	1.58957				22:50:04	2023-12-18 22:50:04	2a	0.01	0.015	0.015	36.959	2463.93	24.6393	2.30994	2.63993	22.3294
22:39:35	2023-12-18 22:39:35	1b	0.005	0.003	0.003	8.54624	2848.75	14.2437	2.13656	4.27312	12.1072	18.5168		22:39:35	2023-12-18 22:39:35	1b	0.005	0.003	0.003	6.39598	2131.99	10.66	1.599	3.19799	9.06097	13.858		13.1055	18.5168	9.06097	17.0371	11.1396	1.47974	2.07867				22:55:05	2023-12-18 22:55:05	2a	0.009	0.015	0.015	36.959	2463.93	22.1754	2.30994	2.63993	19.8655
22:41:57	2023-12-18 22:41:57	1b	0.006	0.003	0.003	8.54624	2848.75	17.0925	2.13656	4.27312	14.9559	21.3656		22:41:57	2023-12-18 22:41:57	1b	0.006	0.003	0.003	6.39598	2131.99	12.792	1.599	3.19799	11.193	15.99		15.7266	21.3656	11.193	19.6582	13.7607	1.70739	2.56777				23:00:06	2023-12-18 23:00:06	2a	0.008	0.015	0.015	36.959	2463.93	19.7115	2.30994	2.63993	17.4015
22:45:04	2023-12-18 22:45:04	1b	0.008	0.003	0.003	8.54624	2848.75	22.79	2.13656	4.27312	20.6534	27.0631		22:45:04	2023-12-18 22:45:04	1b	0.008	0.003	0.003	6.39598	2131.99	17.056	1.599	3.19799	15.457	20.2539		20.9687	27.0631	15.457	24.9004	19.0029	2.16269	3.54597				23:05:02	2023-12-18 23:05:02	2a	0.007	0.015	0.015	36.959	2463.93	17.2475	2.30994	2.63993	14.9376
22:47:38	2023-12-18 22:47:38	1b	0.009	0.003	0.003	8.54624	2848.75	25.6387	2.13656	4.27312	23.5021	29.9118		22:47:38	2023-12-18 22:47:38	1b	0.009	0.003	0.003	6.39598	2131.99	19.1879	1.599	3.19799	17.5889	22.3859		23.5898	29.9118	17.5889	27.5215	21.624	2.39035	4.03507				23:10:06	2023-12-18 23:10:06	2a	0.007	0.015	0.015	36.959	2463.93	17.2475	2.30994	2.63993	14.9376
22:50:04	2023-12-18 22:50:04	1b	0.009	0.003	0.003	8.54624	2848.75	25.6387	2.13656	4.27312	23.5021	29.9118		22:50:04	2023-12-18 22:50:04	1b	0.009	0.003	0.003	6.39598	2131.99	19.1879	1.599	3.19799	17.5889	22.3859		23.5898	29.9118	17.5889	27.5215	21.624	2.39035	4.03507				23:15:04	2023-12-18 23:15:04	2a	0.006	0.015	0.015	36.959	2463.93	14.7836	2.30994	2.63993	12.4737
22:55:05	2023-12-18 22:55:05	1b	0.007	0.003	0.003	8.54624	2848.75	19.9412	2.13656	4.27312	17.8047	24.2143		22:55:05	2023-12-18 22:55:05	1b	0.007	0.003	0.003	6.39598	2131.99	14.924	1.599	3.19799	13.325	18.1219		18.3477	24.2143	13.325	22.2793	16.3818	1.93504	3.05687				23:20:07	2023-12-18 23:20:07	2a	0.007	0.015	0.015	36.959	2463.93	17.2475	2.30994	2.63993	14.9376
23:00:06	2023-12-18 23:00:06	1b	0.01	0.003	0.003	8.54624	2848.75	28.4875	2.13656	4.27312	26.3509	32.7606		23:00:06	2023-12-18 23:00:06	1b	0.01	0.003	0.003	6.39598	2131.99	21.3199	1.599	3.19799	19.7209	24.5179		26.2109	32.7606	19.7209	30.1426	24.2451	2.618	4.52417				23:25:11	2023-12-18 23:25:11	2a	0.006	0.015	0.015	36.959	2463.93	14.7836	2.30994	2.63993	12.4737
23:05:02	2023-12-18 23:05:02	1b	0.01	0.003	0.003	8.54624	2848.75	28.4875	2.13656	4.27312	26.3509	32.7606		23:05:02	2023-12-18 23:05:02	1b	0.01	0.003	0.003	6.39598	2131.99	21.3199	1.599	3.19799	19.7209	24.5179		26.2109	32.7606	19.7209	30.1426	24.2451	2.618	4.52417				23:30:03	2023-12-18 23:30:03	2a	0.005	0.015	0.015	36.959	2463.93	12.3197	2.30994	2.63993	10.0097
23:10:06	2023-12-18 23:10:06	1b	0.01	0.003	0.003	8.54624	2848.75	28.4875	2.13656	4.27312	26.3509	32.7606		23:10:06	2023-12-18 23:10:06	1b	0.01	0.003	0.003	6.39598	2131.99	21.3199	1.599	3.19799	19.7209	24.5179		26.2109	32.7606	19.7209	30.1426	24.2451	2.618	4.52417				23:35:07	2023-12-18 23:35:07	2a	0.007	0.015	0.015	36.959	2463.93	17.2475	2.30994	2.63993	14.9376
23:15:04	2023-12-18 23:15:04	1b	0.009	0.003	0.003	8.54624	2848.75	25.6387	2.13656	4.27312	23.5021	29.9118		23:15:04	2023-12-18 23:15:04	1b	0.009	0.003	0.003	6.39598	2131.99	19.1879	1.599	3.19799	17.5889	22.3859		23.5898	29.9118	17.5889	27.5215	21.624	2.39035	4.03507				23:40:11	2023-12-18 23:40:11	2a	0.007	0.015	0.015	36.959	2463.93	17.2475	2.30994	2.63993	14.9376
23:20:07	2023-12-18 23:20:07	1b	0.007	0.003	0.003	8.54624	2848.75	19.9412	2.13656	4.27312	17.8047	24.2143		23:20:07	2023-12-18 23:20:07	1b	0.007	0.003	0.003	6.39598	2131.99	14.924	1.599	3.19799	13.325	18.1219		18.3477	24.2143	13.325	22.2793	16.3818	1.93504	3.05687				23:45:06	2023-12-18 23:45:06	2a	0.005	0.015	0.015	36.959	2463.93	12.3197	2.30994	2.63993	10.0097
23:25:11	2023-12-18 23:25:11	1b	0.007	0.003	0.003	8.54624	2848.75	19.9412	2.13656	4.27312	17.8047	24.2143		23:25:11	2023-12-18 23:25:11	1b	0.007	0.003	0.003	6.39598	2131.99	14.924	1.599	3.19799	13.325	18.1219		18.3477	24.2143	13.325	22.2793	16.3818	1.93504	3.05687				23:50:11	2023-12-18 23:50:11	2a	0.005	0.015	0.015	36.959	2463.93	12.3197	2.30994	2.63993	10.0097
23:30:03	2023-12-18 23:30:03	1b	0.01	0.003	0.003	8.54624	2848.75	28.4875	2.13656	4.27312	26.3509	32.7606		23:30:03	2023-12-18 23:30:03	1b	0.01	0.003	0.003	6.39598	2131.99	21.3199	1.599	3.19799	19.7209	24.5179		26.2109	32.7606	19.7209	30.1426	24.2451	2.618	4.52417				23:55:04	2023-12-18 23:55:04	2a	0.004	0.015	0.015	36.959	2463.93	9.85573	2.30994	2.63993	7.54579
23:35:07	2023-12-18 23:35:07	1b	0.007	0.003	0.003	8.54624	2848.75	19.9412	2.13656	4.27312	17.8047	24.2143		23:35:07	2023-12-18 23:35:07	1b	0.007	0.003	0.003	6.39598	2131.99	14.924	1.599	3.19799	13.325	18.1219		18.3477	24.2143	13.325	22.2793	16.3818	1.93504	3.05687				00:00:08	2023-12-19 00:00:08	2a	0.005	0.015	0.015	36.959	2463.93	12.3197	2.30994	2.63993	10.0097
23:40:11	2023-12-18 23:40:11	1b	0.006	0.003	0.003	8.54624	2848.75	17.0925	2.13656	4.27312	14.9559	21.3656		23:40:11	2023-12-18 23:40:11	1b	0.006	0.003	0.003	6.39598	2131.99	12.792	1.599	3.19799	11.193	15.99		15.7266	21.3656	11.193	19.6582	13.7607	1.70739	2.56777				00:05:11	2023-12-19 00:05:11	2a	0.005	0.015	0.015	36.959	2463.93	12.3197	2.30994	2.63993	10.0097
23:45:06	2023-12-18 23:45:06	1b	0.007	0.003	0.003	8.54624	2848.75	19.9412	2.13656	4.27312	17.8047	24.2143		23:45:06	2023-12-18 23:45:06	1b	0.007	0.003	0.003	6.39598	2131.99	14.924	1.599	3.19799	13.325	18.1219		18.3477	24.2143	13.325	22.2793	16.3818	1.93504	3.05687				00:10:06	2023-12-19 00:10:06	2a	0.002	0.015	0.015	36.959	2463.93	4.92786	2.30994	2.63993	2.61793
23:50:11	2023-12-18 23:50:11	1b	0.007	0.003	0.003	8.54624	2848.75	19.9412	2.13656	4.27312	17.8047	24.2143		23:50:11	2023-12-18 23:50:11	1b	0.007	0.003	0.003	6.39598	2131.99	14.924	1.599	3.19799	13.325	18.1219		18.3477	24.2143	13.325	22.2793	16.3818	1.93504	3.05687				00:15:09	2023-12-19 00:15:09	2a	0.004	0.015	0.015	36.959	2463.93	9.85573	2.30994	2.63993	7.54579
23:55:04	2023-12-18 23:55:04	1b	0.006	0.003	0.003	8.54624	2848.75	17.0925	2.13656	4.27312	14.9559	21.3656		23:55:04	2023-12-18 23:55:04	1b	0.006	0.003	0.003	6.39598	2131.99	12.792	1.599	3.19799	11.193	15.99		15.7266	21.3656	11.193	19.6582	13.7607	1.70739	2.56777				00:20:06	2023-12-19 00:20:06	2a	0.004	0.015	0.015	36.959	2463.93	9.85573	2.30994	2.63993	7.54579
00:00:08	2023-12-19 00:00:08	1b	0.004	0.003	0.003	8.54624	2848.75	11.395	2.13656	4.27312	9.25842	15.6681		00:00:08	2023-12-19 00:00:08	1b	0.004	0.003	0.003	6.39598	2131.99	8.52798	1.599	3.19799	6.92898	11.726		10.4844	15.6681	6.92898	14.416	8.51855	1.25209	1.58957				00:25:11	2023-12-19 00:25:11	2a	0.004	0.015	0.015	36.959	2463.93	9.85573	2.30994	2.63993	7.54579
00:05:11	2023-12-19 00:05:11	1b	0.006	0.003	0.003	8.54624	2848.75	17.0925	2.13656	4.27312	14.9559	21.3656		00:05:11	2023-12-19 00:05:11	1b	0.006	0.003	0.003	6.39598	2131.99	12.792	1.599	3.19799	11.193	15.99		15.7266	21.3656	11.193	19.6582	13.7607	1.70739	2.56777				00:30:08	2023-12-19 00:30:08	2a	0.004	0.015	0.015	36.959	2463.93	9.85573	2.30994	2.63993	7.54579
00:10:06	2023-12-19 00:10:06	1b	0.005	0.003	0.003	8.54624	2848.75	14.2437	2.13656	4.27312	12.1072	18.5168		00:10:06	2023-12-19 00:10:06	1b	0.005	0.003	0.003	6.39598	2131.99	10.66	1.599	3.19799	9.06097	13.858		13.1055	18.5168	9.06097	17.0371	11.1396	1.47974	2.07867				00:35:06	2023-12-19 00:35:06	2a	0.004	0.015	0.015	36.959	2463.93	9.85573	2.30994	2.63993	7.54579
00:15:09	2023-12-19 00:15:09	1b	0.004	0.003	0.003	8.54624	2848.75	11.395	2.13656	4.27312	9.25842	15.6681		00:15:09	2023-12-19 00:15:09	1b	0.004	0.003	0.003	6.39598	2131.99	8.52798	1.599	3.19799	6.92898	11.726		10.4844	15.6681	6.92898	14.416	8.51855	1.25209	1.58957				00:40:07	2023-12-19 00:40:07	2a	0.003	0.015	0.015	36.959	2463.93	7.3918	2.30994	2.63993	5.08186
00:20:06	2023-12-19 00:20:06	1b	0.003	0.003	0.003	8.54624	2848.75	8.54624	2.13656	4.27312	6.40968	12.8194		00:20:06	2023-12-19 00:20:06	1b	0.003	0.003	0.003	6.39598	2131.99	6.39598	1.599	3.19799	4.79699	9.59397		7.86328	12.8194	4.79699	11.7949	5.89746	1.02443	1.10047				00:45:10	2023-12-19 00:45:10	2a	0.003	0.015	0.015	36.959	2463.93	7.3918	2.30994	2.63993	5.08186
00:25:11	2023-12-19 00:25:11	1b	0.005	0.003	0.003	8.54624	2848.75	14.2437	2.13656	4.27312	12.1072	18.5168		00:25:11	2023-12-19 00:25:11	1b	0.005	0.003	0.003	6.39598	2131.99	10.66	1.599	3.19799	9.06097	13.858		13.1055	18.5168	9.06097	17.0371	11.1396	1.47974	2.07867				00:50:05	2023-12-19 00:50:05	2a	0.004	0.015	0.015	36.959	2463.93	9.85573	2.30994	2.63993	7.54579
00:30:08	2023-12-19 00:30:08	1b	0.005	0.003	0.003	8.54624	2848.75	14.2437	2.13656	4.27312	12.1072	18.5168		00:30:08	2023-12-19 00:30:08	1b	0.005	0.003	0.003	6.39598	2131.99	10.66	1.599	3.19799	9.06097	13.858		13.1055	18.5168	9.06097	17.0371	11.1396	1.47974	2.07867				00:55:10	2023-12-19 00:55:10	2a	0.002	0.015	0.015	36.959	2463.93	4.92786	2.30994	2.63993	2.61793
00:35:06	2023-12-19 00:35:06	1b	0.004	0.003	0.003	8.54624	2848.75	11.395	2.13656	4.27312	9.25842	15.6681		00:35:06	2023-12-19 00:35:06	1b	0.004	0.003	0.003	6.39598	2131.99	8.52798	1.599	3.19799	6.92898	11.726		10.4844	15.6681	6.92898	14.416	8.51855	1.25209	1.58957				22:22:23
00:40:07	2023-12-19 00:40:07	1b	0.005	0.003	0.003	8.54624	2848.75	14.2437	2.13656	4.27312	12.1072	18.5168		00:40:07	2023-12-19 00:40:07	1b	0.005	0.003	0.003	6.39598	2131.99	10.66	1.599	3.19799	9.06097	13.858		13.1055	18.5168	9.06097	17.0371	11.1396	1.47974	2.07867				22:23:47	2023-12-18 22:23:47	2b	0.024	0.022	0.025	80.8999	3236	77.6639	3.11154	3.37083	74.5524
00:45:10	2023-12-19 00:45:10	1b	0.005	0.003	0.003	8.54624	2848.75	14.2437	2.13656	4.27312	12.1072	18.5168		00:45:10	2023-12-19 00:45:10	1b	0.005	0.003	0.003	6.39598	2131.99	10.66	1.599	3.19799	9.06097	13.858		13.1055	18.5168	9.06097	17.0371	11.1396	1.47974	2.07867				22:23:59	2023-12-18 22:23:59	2b	0.02	0.023	0.025	80.8999	3236	64.7199	3.11154	3.37083	61.6084
00:50:05	2023-12-19 00:50:05	1b	0.003	0.003	0.003	8.54624	2848.75	8.54624	2.13656	4.27312	6.40968	12.8194		00:50:05	2023-12-19 00:50:05	1b	0.003	0.003	0.003	6.39598	2131.99	6.39598	1.599	3.19799	4.79699	9.59397		7.86328	12.8194	4.79699	11.7949	5.89746	1.02443	1.10047				22:24:11	2023-12-18 22:24:11	2b	0.021	0.023	0.025	80.8999	3236	67.9559	3.11154	3.37083	64.8444
00:55:10	2023-12-19 00:55:10	1b	0.004	0.003	0.003	8.54624	2848.75	11.395	2.13656	4.27312	9.25842	15.6681		00:55:10	2023-12-19 00:55:10	1b	0.004	0.003	0.003	6.39598	2131.99	8.52798	1.599	3.19799	6.92898	11.726		10.4844	15.6681	6.92898	14.416	8.51855	1.25209	1.58957				22:24:24	2023-12-18 22:24:24	2b	0.023	0.023	0.025	80.8999	3236	74.4279	3.11154	3.37083	71.3164
22:26:34														22:26:34															0	0			0	0				22:24:36	2023-12-18 22:24:36	2b	0.024	0.023	0.025	80.8999	3236	77.6639	3.11154	3.37083	74.5524
22:26:40	2023-12-18 22:26:40	1c	0.004	0.002	0.007	37.8571	5408.16	21.6327	4.73214	6.30952	16.9005	27.9422		22:26:40	2023-12-18 22:26:40	1c	0.004	0.002	0.007	28.2343	4033.47	16.1339	3.52929	4.70572	12.6046	20.8396		19.2457	27.9422	12.6046	24.859	15.0357	3.08321	2.43106				22:24:48	2023-12-18 22:24:48	2b	0.022	0.023	0.025	80.8999	3236	71.1919	3.11154	3.37083	68.0804
22:26:45	2023-12-18 22:26:45	1c	0.004	0.003	0.007	37.8571	5408.16	21.6327	4.73214	6.30952	16.9005	27.9422		22:26:45	2023-12-18 22:26:45	1c	0.004	0.003	0.007	28.2343	4033.47	16.1339	3.52929	4.70572	12.6046	20.8396		19.2457	27.9422	12.6046	24.859	15.0357	3.08321	2.43106				22:24:58	2023-12-18 22:24:58	2b	0.025	0.023	0.025	80.8999	3236	80.8999	3.11154	3.37083	77.7884
22:26:52	2023-12-18 22:26:52	1c	0.005	0.005	0.007	37.8571	5408.16	27.0408	4.73214	6.30952	22.3087	33.3503		22:26:52	2023-12-18 22:26:52	1c	0.005	0.005	0.007	28.2343	4033.47	20.1674	3.52929	4.70572	16.6381	24.8731		24.0571	33.3503	16.6381	29.6704	19.8471	3.67996	3.209				22:25:30	2023-12-18 22:25:30	2b	0.028	0.025	0.025	80.8999	3236	90.6079	3.11154	3.37083	87.4964
22:27:00	2023-12-18 22:27:00	1c	0.006	0.006	0.007	37.8571	5408.16	32.449	4.73214	6.30952	27.7168	38.7585		22:27:00	2023-12-18 22:27:00	1c	0.006	0.006	0.007	28.2343	4033.47	24.2008	3.52929	4.70572	20.6716	28.9066		28.8685	38.7585	20.6716	34.4818	24.6585	4.27671	3.98694				22:26:06	2023-12-18 22:26:06	2b	0.025	0.025	0.025	80.8999	3236	80.8999	3.11154	3.37083	77.7884
22:27:12	2023-12-18 22:27:12	1c	0.006	0.007	0.007	37.8571	5408.16	32.449	4.73214	6.30952	27.7168	38.7585		22:27:12	2023-12-18 22:27:12	1c	0.006	0.007	0.007	28.2343	4033.47	24.2008	3.52929	4.70572	20.6716	28.9066		28.8685	38.7585	20.6716	34.4818	24.6585	4.27671	3.98694				22:26:35	2023-12-18 22:26:35	2b	0.025	0.025	0.025	80.8999	3236	80.8999	3.11154	3.37083	77.7884
22:27:20	2023-12-18 22:27:20	1c	0.005	0.007	0.007	37.8571	5408.16	27.0408	4.73214	6.30952	22.3087	33.3503		22:27:20	2023-12-18 22:27:20	1c	0.005	0.007	0.007	28.2343	4033.47	20.1674	3.52929	4.70572	16.6381	24.8731		24.0571	33.3503	16.6381	29.6704	19.8471	3.67996	3.209				22:26:52	2023-12-18 22:26:52	2b	0.03	0.025	0.025	80.8999	3236	97.0799	3.11154	3.37083	93.9684
22:27:28	2023-12-18 22:27:28	1c	0.007	0.007	0.007	37.8571	5408.16	37.8571	4.73214	6.30952	33.125	44.1667		22:27:28	2023-12-18 22:27:28	1c	0.007	0.007	0.007	28.2343	4033.47	28.2343	3.52929	4.70572	24.705	32.94		33.6799	44.1667	24.705	39.2932	29.4699	4.87346	4.76488				22:27:12	2023-12-18 22:27:12	2b	0.025	0.025	0.025	80.8999	3236	80.8999	3.11154	3.37083	77.7884
22:27:39	2023-12-18 22:27:39	1c	0.007	0.007	0.007	37.8571	5408.16	37.8571	4.73214	6.30952	33.125	44.1667		22:27:39	2023-12-18 22:27:39	1c	0.007	0.007	0.007	28.2343	4033.47	28.2343	3.52929	4.70572	24.705	32.94		33.6799	44.1667	24.705	39.2932	29.4699	4.87346	4.76488				22:27:28	2023-12-18 22:27:28	2b	0.026	0.025	0.025	80.8999	3236	84.1359	3.11154	3.37083	81.0244
22:27:56	2023-12-18 22:27:56	1c	0.007	0.007	0.007	37.8571	5408.16	37.8571	4.73214	6.30952	33.125	44.1667		22:27:56	2023-12-18 22:27:56	1c	0.007	0.007	0.007	28.2343	4033.47	28.2343	3.52929	4.70572	24.705	32.94		33.6799	44.1667	24.705	39.2932	29.4699	4.87346	4.76488				22:27:56	2023-12-18 22:27:56	2b	0.028	0.025	0.025	80.8999	3236	90.6079	3.11154	3.37083	87.4964
22:28:31	2023-12-18 22:28:31	1c	0.006	0.007	0.007	37.8571	5408.16	32.449	4.73214	6.30952	27.7168	38.7585		22:28:31	2023-12-18 22:28:31	1c	0.006	0.007	0.007	28.2343	4033.47	24.2008	3.52929	4.70572	20.6716	28.9066		28.8685	38.7585	20.6716	34.4818	24.6585	4.27671	3.98694				22:28:31	2023-12-18 22:28:31	2b	0.023	0.025	0.025	80.8999	3236	74.4279	3.11154	3.37083	71.3164
22:29:01	2023-12-18 22:29:01	1c	0.009	0.007	0.007	37.8571	5408.16	48.6735	4.73214	6.30952	43.9413	54.983		22:29:01	2023-12-18 22:29:01	1c	0.009	0.007	0.007	28.2343	4033.47	36.3013	3.52929	4.70572	32.772	41.007		43.3027	54.983	32.772	48.916	39.0927	6.06696	6.32075				22:29:01	2023-12-18 22:29:01	2b	0.03	0.025	0.025	80.8999	3236	97.0799	3.11154	3.37083	93.9684
22:29:53	2023-12-18 22:29:53	1c	0.007	0.007	0.007	37.8571	5408.16	37.8571	4.73214	6.30952	33.125	44.1667		22:29:53	2023-12-18 22:29:53	1c	0.007	0.007	0.007	28.2343	4033.47	28.2343	3.52929	4.70572	24.705	32.94		33.6799	44.1667	24.705	39.2932	29.4699	4.87346	4.76488				22:29:53	2023-12-18 22:29:53	2b	0.026	0.025	0.025	80.8999	3236	84.1359	3.11154	3.37083	81.0244
22:30:57	2023-12-18 22:30:57	1c	0.008	0.007	0.007	37.8571	5408.16	43.2653	4.73214	6.30952	38.5332	49.5748		22:30:57	2023-12-18 22:30:57	1c	0.008	0.007	0.007	28.2343	4033.47	32.2678	3.52929	4.70572	28.7385	36.9735		38.4913	49.5748	28.7385	44.1046	34.2813	5.47021	5.54281				22:30:57	2023-12-18 22:30:57	2b	0.027	0.025	0.025	80.8999	3236	87.3719	3.11154	3.37083	84.2604
22:31:29	2023-12-18 22:31:29	1c	0.009	0.007	0.007	37.8571	5408.16	48.6735	4.73214	6.30952	43.9413	54.983		22:31:29	2023-12-18 22:31:29	1c	0.009	0.007	0.007	28.2343	4033.47	36.3013	3.52929	4.70572	32.772	41.007		43.3027	54.983	32.772	48.916	39.0927	6.06696	6.32075				22:31:29	2023-12-18 22:31:29	2b	0.027	0.025	0.025	80.8999	3236	87.3719	3.11154	3.37083	84.2604
22:32:01	2023-12-18 22:32:01	1c	0.012	0.007	0.007	37.8571	5408.16	64.898	4.73214	6.30952	60.1658	71.2075		22:32:01	2023-12-18 22:32:01	1c	0.012	0.007	0.007	28.2343	4033.47	48.4017	3.52929	4.70572	44.8724	53.1074		57.737	71.2075	44.8724	63.3503	53.527	7.85721	8.65457				22:32:01	2023-12-18 22:32:01	2b	0.027	0.025	0.025	80.8999	3236	87.3719	3.11154	3.37083	84.2604
22:32:34	2023-12-18 22:32:34	1c	0.01	0.007	0.007	37.8571	5408.16	54.0816	4.73214	6.30952	49.3495	60.3912		22:32:34	2023-12-18 22:32:34	1c	0.01	0.007	0.007	28.2343	4033.47	40.3347	3.52929	4.70572	36.8055	45.0405		48.1141	60.3912	36.8055	53.7274	43.9041	6.66371	7.09869				22:32:34	2023-12-18 22:32:34	2b	0.025	0.025	0.025	80.8999	3236	80.8999	3.11154	3.37083	77.7884
22:33:07	2023-12-18 22:33:07	1c	0.01	0.007	0.007	37.8571	5408.16	54.0816	4.73214	6.30952	49.3495	60.3912		22:33:07	2023-12-18 22:33:07	1c	0.01	0.007	0.007	28.2343	4033.47	40.3347	3.52929	4.70572	36.8055	45.0405		48.1141	60.3912	36.8055	53.7274	43.9041	6.66371	7.09869				22:33:07	2023-12-18 22:33:07	2b	0.025	0.025	0.025	80.8999	3236	80.8999	3.11154	3.37083	77.7884
22:33:29	2023-12-18 22:33:29	1c	0.01	0.007	0.007	37.8571	5408.16	54.0816	4.73214	6.30952	49.3495	60.3912		22:33:29	2023-12-18 22:33:29	1c	0.01	0.007	0.007	28.2343	4033.47	40.3347	3.52929	4.70572	36.8055	45.0405		48.1141	60.3912	36.8055	53.7274	43.9041	6.66371	7.09869				22:33:29	2023-12-18 22:33:29	2b	0.026	0.025	0.025	80.8999	3236	84.1359	3.11154	3.37083	81.0244
22:34:11	2023-12-18 22:34:11	1c	0.011	0.007	0.007	37.8571	5408.16	59.4898	4.73214	6.30952	54.7576	65.7993		22:34:11	2023-12-18 22:34:11	1c	0.011	0.007	0.007	28.2343	4033.47	44.3682	3.52929	4.70572	40.8389	49.0739		52.9255	65.7993	40.8389	58.5389	48.7156	7.26046	7.87663				22:34:11	2023-12-18 22:34:11	2b	0.025	0.025	0.025	80.8999	3236	80.8999	3.11154	3.37083	77.7884
22:35:13	2023-12-18 22:35:13	1c	0.014	0.007	0.007	37.8571	5408.16	75.7143	4.73214	6.30952	70.9821	82.0238		22:35:13	2023-12-18 22:35:13	1c	0.014	0.007	0.007	28.2343	4033.47	56.4686	3.52929	4.70572	52.9393	61.1744		67.3598	82.0238	52.9393	72.9731	63.1498	9.05071	10.2104				22:35:13	2023-12-18 22:35:13	2b	0.026	0.025	0.025	80.8999	3236	84.1359	3.11154	3.37083	81.0244
22:36:21	2023-12-18 22:36:21	1c	0.012	0.007	0.007	37.8571	5408.16	64.898	4.73214	6.30952	60.1658	71.2075		22:36:21	2023-12-18 22:36:21	1c	0.012	0.007	0.007	28.2343	4033.47	48.4017	3.52929	4.70572	44.8724	53.1074		57.737	71.2075	44.8724	63.3503	53.527	7.85721	8.65457				22:36:21	2023-12-18 22:36:21	2b	0.026	0.025	0.025	80.8999	3236	84.1359	3.11154	3.37083	81.0244
22:37:16	2023-12-18 22:37:16	1c	0.012	0.007	0.007	37.8571	5408.16	64.898	4.73214	6.30952	60.1658	71.2075		22:37:16	2023-12-18 22:37:16	1c	0.012	0.007	0.007	28.2343	4033.47	48.4017	3.52929	4.70572	44.8724	53.1074		57.737	71.2075	44.8724	63.3503	53.527	7.85721	8.65457				22:37:16	2023-12-18 22:37:16	2b	0.027	0.025	0.025	80.8999	3236	87.3719	3.11154	3.37083	84.2604
22:38:30	2023-12-18 22:38:30	1c	0.013	0.007	0.007	37.8571	5408.16	70.3061	4.73214	6.30952	65.574	76.6156		22:38:30	2023-12-18 22:38:30	1c	0.013	0.007	0.007	28.2343	4033.47	52.4352	3.52929	4.70572	48.9059	57.1409		62.5484	76.6156	48.9059	68.1617	58.3384	8.45396	9.43251				22:38:30	2023-12-18 22:38:30	2b	0.027	0.025	0.025	80.8999	3236	87.3719	3.11154	3.37083	84.2604
22:39:35	2023-12-18 22:39:35	1c	0.012	0.007	0.007	37.8571	5408.16	64.898	4.73214	6.30952	60.1658	71.2075		22:39:35	2023-12-18 22:39:35	1c	0.012	0.007	0.007	28.2343	4033.47	48.4017	3.52929	4.70572	44.8724	53.1074		57.737	71.2075	44.8724	63.3503	53.527	7.85721	8.65457				22:39:35	2023-12-18 22:39:35	2b	0.026	0.025	0.025	80.8999	3236	84.1359	3.11154	3.37083	81.0244
22:41:57	2023-12-18 22:41:57	1c	0.01	0.007	0.007	37.8571	5408.16	54.0816	4.73214	6.30952	49.3495	60.3912		22:41:57	2023-12-18 22:41:57	1c	0.01	0.007	0.007	28.2343	4033.47	40.3347	3.52929	4.70572	36.8055	45.0405		48.1141	60.3912	36.8055	53.7274	43.9041	6.66371	7.09869				22:41:57	2023-12-18 22:41:57	2b	0.026	0.025	0.025	80.8999	3236	84.1359	3.11154	3.37083	81.0244
22:45:04	2023-12-18 22:45:04	1c	0.009	0.007	0.007	37.8571	5408.16	48.6735	4.73214	6.30952	43.9413	54.983		22:45:04	2023-12-18 22:45:04	1c	0.009	0.007	0.007	28.2343	4033.47	36.3013	3.52929	4.70572	32.772	41.007		43.3027	54.983	32.772	48.916	39.0927	6.06696	6.32075				22:45:04	2023-12-18 22:45:04	2b	0.027	0.025	0.025	80.8999	3236	87.3719	3.11154	3.37083	84.2604
22:47:38	2023-12-18 22:47:38	1c	0.011	0.007	0.007	37.8571	5408.16	59.4898	4.73214	6.30952	54.7576	65.7993		22:47:38	2023-12-18 22:47:38	1c	0.011	0.007	0.007	28.2343	4033.47	44.3682	3.52929	4.70572	40.8389	49.0739		52.9255	65.7993	40.8389	58.5389	48.7156	7.26046	7.87663				22:47:38	2023-12-18 22:47:38	2b	0.024	0.025	0.025	80.8999	3236	77.6639	3.11154	3.37083	74.5524
22:50:04	2023-12-18 22:50:04	1c	0.01	0.007	0.007	37.8571	5408.16	54.0816	4.73214	6.30952	49.3495	60.3912		22:50:04	2023-12-18 22:50:04	1c	0.01	0.007	0.007	28.2343	4033.47	40.3347	3.52929	4.70572	36.8055	45.0405		48.1141	60.3912	36.8055	53.7274	43.9041	6.66371	7.09869				22:50:04	2023-12-18 22:50:04	2b	0.023	0.025	0.025	80.8999	3236	74.4279	3.11154	3.37083	71.3164
22:55:05	2023-12-18 22:55:05	1c	0.012	0.007	0.007	37.8571	5408.16	64.898	4.73214	6.30952	60.1658	71.2075		22:55:05	2023-12-18 22:55:05	1c	0.012	0.007	0.007	28.2343	4033.47	48.4017	3.52929	4.70572	44.8724	53.1074		57.737	71.2075	44.8724	63.3503	53.527	7.85721	8.65457				22:55:05	2023-12-18 22:55:05	2b	0.024	0.025	0.025	80.8999	3236	77.6639	3.11154	3.37083	74.5524
23:00:06	2023-12-18 23:00:06	1c	0.01	0.007	0.007	37.8571	5408.16	54.0816	4.73214	6.30952	49.3495	60.3912		23:00:06	2023-12-18 23:00:06	1c	0.01	0.007	0.007	28.2343	4033.47	40.3347	3.52929	4.70572	36.8055	45.0405		48.1141	60.3912	36.8055	53.7274	43.9041	6.66371	7.09869				23:00:06	2023-12-18 23:00:06	2b	0.021	0.025	0.025	80.8999	3236	67.9559	3.11154	3.37083	64.8444
23:05:02	2023-12-18 23:05:02	1c	0.009	0.007	0.007	37.8571	5408.16	48.6735	4.73214	6.30952	43.9413	54.983		23:05:02	2023-12-18 23:05:02	1c	0.009	0.007	0.007	28.2343	4033.47	36.3013	3.52929	4.70572	32.772	41.007		43.3027	54.983	32.772	48.916	39.0927	6.06696	6.32075				23:05:02	2023-12-18 23:05:02	2b	0.022	0.025	0.025	80.8999	3236	71.1919	3.11154	3.37083	68.0804
23:10:06	2023-12-18 23:10:06	1c	0.007	0.007	0.007	37.8571	5408.16	37.8571	4.73214	6.30952	33.125	44.1667		23:10:06	2023-12-18 23:10:06	1c	0.007	0.007	0.007	28.2343	4033.47	28.2343	3.52929	4.70572	24.705	32.94		33.6799	44.1667	24.705	39.2932	29.4699	4.87346	4.76488				23:10:06	2023-12-18 23:10:06	2b	0.022	0.025	0.025	80.8999	3236	71.1919	3.11154	3.37083	68.0804
23:15:04	2023-12-18 23:15:04	1c	0.007	0.007	0.007	37.8571	5408.16	37.8571	4.73214	6.30952	33.125	44.1667		23:15:04	2023-12-18 23:15:04	1c	0.007	0.007	0.007	28.2343	4033.47	28.2343	3.52929	4.70572	24.705	32.94		33.6799	44.1667	24.705	39.2932	29.4699	4.87346	4.76488				23:15:04	2023-12-18 23:15:04	2b	0.021	0.025	0.025	80.8999	3236	67.9559	3.11154	3.37083	64.8444
23:20:07	2023-12-18 23:20:07	1c	0.007	0.007	0.007	37.8571	5408.16	37.8571	4.73214	6.30952	33.125	44.1667		23:20:07	2023-12-18 23:20:07	1c	0.007	0.007	0.007	28.2343	4033.47	28.2343	3.52929	4.70572	24.705	32.94		33.6799	44.1667	24.705	39.2932	29.4699	4.87346	4.76488				23:10:07	2023-12-18 23:10:07	2b	0.021	0.025	0.025	80.8999	3236	67.9559	3.11154	3.37083	64.8444
23:25:11	2023-12-18 23:25:11	1c	0.007	0.007	0.007	37.8571	5408.16	37.8571	4.73214	6.30952	33.125	44.1667		23:25:11	2023-12-18 23:25:11	1c	0.007	0.007	0.007	28.2343	4033.47	28.2343	3.52929	4.70572	24.705	32.94		33.6799	44.1667	24.705	39.2932	29.4699	4.87346	4.76488				23:25:11	2023-12-18 23:25:11	2b	0.019	0.025	0.025	80.8999	3236	61.4839	3.11154	3.37083	58.3724
23:30:03	2023-12-18 23:30:03	1c	0.006	0.007	0.007	37.8571	5408.16	32.449	4.73214	6.30952	27.7168	38.7585		23:30:03	2023-12-18 23:30:03	1c	0.006	0.007	0.007	28.2343	4033.47	24.2008	3.52929	4.70572	20.6716	28.9066		28.8685	38.7585	20.6716	34.4818	24.6585	4.27671	3.98694				23:30:03	2023-12-18 23:30:03	2b	0.021	0.025	0.025	80.8999	3236	67.9559	3.11154	3.37083	64.8444
23:35:07	2023-12-18 23:35:07	1c	0.006	0.007	0.007	37.8571	5408.16	32.449	4.73214	6.30952	27.7168	38.7585		23:35:07	2023-12-18 23:35:07	1c	0.006	0.007	0.007	28.2343	4033.47	24.2008	3.52929	4.70572	20.6716	28.9066		28.8685	38.7585	20.6716	34.4818	24.6585	4.27671	3.98694				23:35:07	2023-12-18 23:35:07	2b	0.016	0.025	0.025	80.8999	3236	51.7759	3.11154	3.37083	48.6644
23:40:11	2023-12-18 23:40:11	1c	0.005	0.007	0.007	37.8571	5408.16	27.0408	4.73214	6.30952	22.3087	33.3503		23:40:11	2023-12-18 23:40:11	1c	0.005	0.007	0.007	28.2343	4033.47	20.1674	3.52929	4.70572	16.6381	24.8731		24.0571	33.3503	16.6381	29.6704	19.8471	3.67996	3.209				23:40:11	2023-12-18 23:40:11	2b	0.017	0.025	0.025	80.8999	3236	55.0119	3.11154	3.37083	51.9004
23:45:06	2023-12-18 23:45:06	1c	0.006	0.007	0.007	37.8571	5408.16	32.449	4.73214	6.30952	27.7168	38.7585		23:45:06	2023-12-18 23:45:06	1c	0.006	0.007	0.007	28.2343	4033.47	24.2008	3.52929	4.70572	20.6716	28.9066		28.8685	38.7585	20.6716	34.4818	24.6585	4.27671	3.98694				23:45:06	2023-12-18 23:45:06	2b	0.018	0.025	0.025	80.8999	3236	58.2479	3.11154	3.37083	55.1364
23:50:11	2023-12-18 23:50:11	1c	0.008	0.007	0.007	37.8571	5408.16	43.2653	4.73214	6.30952	38.5332	49.5748		23:50:11	2023-12-18 23:50:11	1c	0.008	0.007	0.007	28.2343	4033.47	32.2678	3.52929	4.70572	28.7385	36.9735		38.4913	49.5748	28.7385	44.1046	34.2813	5.47021	5.54281				23:50:11	2023-12-18 23:50:11	2b	0.017	0.025	0.025	80.8999	3236	55.0119	3.11154	3.37083	51.9004
23:55:04	2023-12-18 23:55:04	1c	0.004	0.007	0.007	37.8571	5408.16	21.6327	4.73214	6.30952	16.9005	27.9422		23:55:04	2023-12-18 23:55:04	1c	0.004	0.007	0.007	28.2343	4033.47	16.1339	3.52929	4.70572	12.6046	20.8396		19.2457	27.9422	12.6046	24.859	15.0357	3.08321	2.43106				23:55:04	2023-12-18 23:55:04	2b	0.014	0.025	0.025	80.8999	3236	45.304	3.11154	3.37083	42.1924
00:00:08	2023-12-19 00:00:08	1c	0.004	0.007	0.007	37.8571	5408.16	21.6327	4.73214	6.30952	16.9005	27.9422		00:00:08	2023-12-19 00:00:08	1c	0.004	0.007	0.007	28.2343	4033.47	16.1339	3.52929	4.70572	12.6046	20.8396		19.2457	27.9422	12.6046	24.859	15.0357	3.08321	2.43106				00:00:08	2023-12-19 00:00:08	2b	0.015	0.025	0.025	80.8999	3236	48.54	3.11154	3.37083	45.4284
00:05:11	2023-12-19 00:05:11	1c	0.006	0.007	0.007	37.8571	5408.16	32.449	4.73214	6.30952	27.7168	38.7585		00:05:11	2023-12-19 00:05:11	1c	0.006	0.007	0.007	28.2343	4033.47	24.2008	3.52929	4.70572	20.6716	28.9066		28.8685	38.7585	20.6716	34.4818	24.6585	4.27671	3.98694				00:05:11	2023-12-19 00:05:11	2b	0.017	0.025	0.025	80.8999	3236	55.0119	3.11154	3.37083	51.9004
00:10:06	2023-12-19 00:10:06	1c	0.005	0.007	0.007	37.8571	5408.16	27.0408	4.73214	6.30952	22.3087	33.3503		00:10:06	2023-12-19 00:10:06	1c	0.005	0.007	0.007	28.2343	4033.47	20.1674	3.52929	4.70572	16.6381	24.8731		24.0571	33.3503	16.6381	29.6704	19.8471	3.67996	3.209				00:10:06	2023-12-19 00:10:06	2b	0.012	0.025	0.025	80.8999	3236	38.832	3.11154	3.37083	35.7204
00:15:09	2023-12-19 00:15:09	1c	0.004	0.007	0.007	37.8571	5408.16	21.6327	4.73214	6.30952	16.9005	27.9422		00:15:09	2023-12-19 00:15:09	1c	0.004	0.007	0.007	28.2343	4033.47	16.1339	3.52929	4.70572	12.6046	20.8396		19.2457	27.9422	12.6046	24.859	15.0357	3.08321	2.43106				00:15:09	2023-12-19 00:15:09	2b	0.012	0.025	0.025	80.8999	3236	38.832	3.11154	3.37083	35.7204
00:20:06	2023-12-19 00:20:06	1c	0.004	0.007	0.007	37.8571	5408.16	21.6327	4.73214	6.30952	16.9005	27.9422		00:20:06	2023-12-19 00:20:06	1c	0.004	0.007	0.007	28.2343	4033.47	16.1339	3.52929	4.70572	12.6046	20.8396		19.2457	27.9422	12.6046	24.859	15.0357	3.08321	2.43106				00:20:06	2023-12-19 00:20:06	2b	0.014	0.025	0.025	80.8999	3236	45.304	3.11154	3.37083	42.1924
00:25:11	2023-12-19 00:25:11	1c	0.007	0.007	0.007	37.8571	5408.16	37.8571	4.73214	6.30952	33.125	44.1667		00:25:11	2023-12-19 00:25:11	1c	0.007	0.007	0.007	28.2343	4033.47	28.2343	3.52929	4.70572	24.705	32.94		33.6799	44.1667	24.705	39.2932	29.4699	4.87346	4.76488				00:25:11	2023-12-19 00:25:11	2b	0.014	0.025	0.025	80.8999	3236	45.304	3.11154	3.37083	42.1924
00:30:08	2023-12-19 00:30:08	1c	0.005	0.007	0.007	37.8571	5408.16	27.0408	4.73214	6.30952	22.3087	33.3503		00:30:08	2023-12-19 00:30:08	1c	0.005	0.007	0.007	28.2343	4033.47	20.1674	3.52929	4.70572	16.6381	24.8731		24.0571	33.3503	16.6381	29.6704	19.8471	3.67996	3.209				00:30:08	2023-12-19 00:30:08	2b	0.012	0.025	0.025	80.8999	3236	38.832	3.11154	3.37083	35.7204
00:35:06	2023-12-19 00:35:06	1c	0.006	0.007	0.007	37.8571	5408.16	32.449	4.73214	6.30952	27.7168	38.7585		00:35:06	2023-12-19 00:35:06	1c	0.006	0.007	0.007	28.2343	4033.47	24.2008	3.52929	4.70572	20.6716	28.9066		28.8685	38.7585	20.6716	34.4818	24.6585	4.27671	3.98694				00:35:06	2023-12-19 00:35:06	2b	0.009	0.025	0.025	80.8999	3236	29.124	3.11154	3.37083	26.0124
00:40:07	2023-12-19 00:40:07	1c	0.005	0.007	0.007	37.8571	5408.16	27.0408	4.73214	6.30952	22.3087	33.3503		00:40:07	2023-12-19 00:40:07	1c	0.005	0.007	0.007	28.2343	4033.47	20.1674	3.52929	4.70572	16.6381	24.8731		24.0571	33.3503	16.6381	29.6704	19.8471	3.67996	3.209				00:40:07	2023-12-19 00:40:07	2b	0.011	0.025	0.025	80.8999	3236	35.596	3.11154	3.37083	32.4844
00:45:10	2023-12-19 00:45:10	1c	0.003	0.007	0.007	37.8571	5408.16	16.2245	4.73214	6.30952	11.4923	22.534		00:45:10	2023-12-19 00:45:10	1c	0.003	0.007	0.007	28.2343	4033.47	12.1004	3.52929	4.70572	8.57113	16.8061		14.4342	22.534	8.57113	20.0476	10.2243	2.48646	1.65312				00:45:10	2023-12-19 00:45:10	2b	0.007	0.025	0.025	80.8999	3236	22.652	3.11154	3.37083	19.5404
00:50:05	2023-12-19 00:50:05	1c	0.004	0.007	0.007	37.8571	5408.16	21.6327	4.73214	6.30952	16.9005	27.9422		00:50:05	2023-12-19 00:50:05	1c	0.004	0.007	0.007	28.2343	4033.47	16.1339	3.52929	4.70572	12.6046	20.8396		19.2457	27.9422	12.6046	24.859	15.0357	3.08321	2.43106				00:50:05	2023-12-19 00:50:05	2b	0.008	0.025	0.025	80.8999	3236	25.888	3.11154	3.37083	22.7764
00:55:10	2023-12-19 00:55:10	1c	0.005	0.007	0.007	37.8571	5408.16	27.0408	4.73214	6.30952	22.3087	33.3503		00:55:10	2023-12-19 00:55:10	1c	0.005	0.007	0.007	28.2343	4033.47	20.1674	3.52929	4.70572	16.6381	24.8731		24.0571	33.3503	16.6381	29.6704	19.8471	3.67996	3.209				00:55:10	2023-12-19 00:55:10	2b	0.009	0.025	0.025	80.8999	3236	29.124	3.11154	3.37083	26.0124
[truncated: 154 more columns]

## Sheet: JANUARY ANGULAR UNCERTAINTY
FISSURE 1b TAKING THE ANGLE FROM THE NORTHERN TIP OF THE POTENTIAL WEBCAM AREA															FISSURE 1b TAKING THE ANGLE FROM THE SOUTHERN TIP OF THE POTENTIAL WEBCAM AREA																									FISSURE 1c TAKING THE ANGLE FROM THE NORTHERN TIP OF THE POTENTIAL WEBCAM AREA
Time	TimeAndDate	Fissure	Fire foutain height on screen (m)	Fissure length on screen at that time (m)	Total fissure length on screen (m)	Real fissure length (m)	Real apparent fissure length (m)	Scaling factor	Real fire fountain height (m)	Positive uncertainty	Negative uncertainty	Upper bound	Lower bound		Time	TimeAndDate	Fissure	Fire foutain height on screen (m)	Fissure length on screen at that time (m)	Total fissure length on screen (m)	Real fissure length (m)	Real apparent fissure length (m)	Scaling factor	Real fire fountain height (m)	Positive uncertainty	Negative uncertainty	Upper bound	Lower bound		Fire fountain height	Upper Bound with angular uncertainty	Lower Bound with angular uncertainty	upper bound from just ruler uncertainty	lower bound from just ruler uncertainty	Upper difference	lower difference				Time	TimeAndDate	Fissure	Fire foutain height on screen (m)	Fissure length on screen at that time (m)	Total fissure length on screen (m)	Real fissure length (m)	Real apparent fissure length (m)	Scaling factor	Real fire fountain height (m)
08:03:26	2024-01-14 08:03:26	1b	0.007	0.05	0.056	176.3	172.121	3073.59	21.5151	3.01967	3.12947	24.5348	18.3857		08:03:26	2024-01-14 08:03:26	1b	0.007	0.05	0.056	176.3	155.082	2769.32	19.3853	2.72074	2.81967	22.106	16.5656		20.7085	24.5348	16.5656	23.6149	17.6963	0.919861	1.13075				08:06:45	2024-01-14 08:06:45	1c	0.003	0.01	0.05	197.2	196.357	3927.14	11.7814
08:03:40	2024-01-14 08:03:40	1b	0.013	0.05	0.056	176.3	172.121	3073.59	39.9567	3.01967	3.12947	42.9763	36.8272		08:03:40	2024-01-14 08:03:40	1b	0.013	0.05	0.056	176.3	155.082	2769.32	36.0012	2.72074	2.81967	38.7219	33.1815		38.4586	42.9763	33.1815	41.3651	35.4465	1.61127	2.26494				08:07:23	2024-01-14 08:07:23	1c	0.005	0.015	0.05	197.2	196.357	3927.14	19.6357
08:03:50	2024-01-14 08:03:50	1b	0.014	0.05	0.056	176.3	172.121	3073.59	43.0302	3.01967	3.12947	46.0499	39.9008		08:03:50	2024-01-14 08:03:50	1b	0.014	0.05	0.056	176.3	155.082	2769.32	38.7705	2.72074	2.81967	41.4912	35.9508		41.417	46.0499	35.9508	44.3234	38.4048	1.72651	2.45397				08:08:12	2024-01-14 08:08:12	1c	0.004	0.017	0.05	197.2	196.357	3927.14	15.7086
08:05:23	2024-01-14 08:05:23	1b	0.012	0.055	0.056	176.3	172.121	3073.59	36.8831	3.01967	3.12947	39.9027	33.7536		08:05:23	2024-01-14 08:05:23	1b	0.012	0.055	0.056	176.3	155.082	2769.32	33.2319	2.72074	2.81967	35.9526	30.4122		35.5002	39.9027	30.4122	38.4067	32.4881	1.49604	2.07591				08:08:38	2024-01-14 08:08:38	1c	0.006	0.02	0.05	197.2	196.357	3927.14	23.5628
08:07:57	2024-01-14 08:07:57	1b	0.014	0.056	0.056	176.3	172.121	3073.59	43.0302	3.01967	3.12947	46.0499	39.9008		08:07:57	2024-01-14 08:07:57	1b	0.014	0.056	0.056	176.3	155.082	2769.32	38.7705	2.72074	2.81967	41.4912	35.9508		41.417	46.0499	35.9508	44.3234	38.4048	1.72651	2.45397				08:09:25	2024-01-14 08:09:25	1c	0.003	0.027	0.05	197.2	196.357	3927.14	11.7814
08:08:03	2024-01-14 08:08:03	1b	0.018	0.056	0.056	176.3	172.121	3073.59	55.3246	3.01967	3.12947	58.3443	52.1951		08:08:03	2024-01-14 08:08:03	1b	0.018	0.056	0.056	176.3	155.082	2769.32	49.8478	2.72074	2.81967	52.5685	47.0281		53.2504	58.3443	47.0281	56.1568	50.2382	2.18745	3.2101				08:10:30	2024-01-14 08:10:30	1c	0.005	0.032	0.05	197.2	196.357	3927.14	19.6357
08:08:38	2024-01-14 08:08:38	1b	0.015	0.056	0.056	176.3	172.121	3073.59	46.1038	3.01967	3.12947	49.1235	42.9744		08:08:38	2024-01-14 08:08:38	1b	0.015	0.056	0.056	176.3	155.082	2769.32	41.5398	2.72074	2.81967	44.2606	38.7202		44.3753	49.1235	38.7202	47.2818	41.3632	1.84174	2.643				08:11:34	2024-01-14 08:11:34	1c	0.004	0.035	0.05	197.2	196.357	3927.14	15.7086
08:08:51	2024-01-14 08:08:51	1b	0.019	0.056	0.056	176.3	172.121	3073.59	58.3982	3.01967	3.12947	61.4179	55.2687		08:08:51	2024-01-14 08:08:51	1b	0.019	0.056	0.056	176.3	155.082	2769.32	52.6171	2.72074	2.81967	55.3379	49.7974		56.2087	61.4179	49.7974	59.1152	53.1966	2.30268	3.39913				08:12:14	2024-01-14 08:12:14	1c	0.004	0.042	0.05	197.2	196.357	3927.14	15.7086
08:09:25	2024-01-14 08:09:25	1b	0.017	0.056	0.056	176.3	172.121	3073.59	52.251	3.01967	3.12947	55.2707	49.1215		08:09:25	2024-01-14 08:09:25	1b	0.017	0.056	0.056	176.3	155.082	2769.32	47.0785	2.72074	2.81967	49.7992	44.2588		50.292	55.2707	44.2588	53.1985	47.2799	2.07221	3.02107				08:12:51	2024-01-14 08:12:51	1c	0.005	0.045	0.05	197.2	196.357	3927.14	19.6357
08:10:30	2024-01-14 08:10:30	1b	0.014	0.056	0.056	176.3	172.121	3073.59	43.0302	3.01967	3.12947	46.0499	39.9008		08:10:30	2024-01-14 08:10:30	1b	0.014	0.056	0.056	176.3	155.082	2769.32	38.7705	2.72074	2.81967	41.4912	35.9508		41.417	46.0499	35.9508	44.3234	38.4048	1.72651	2.45397				08:13:49	2024-01-14 08:13:49	1c	0.006	0.046	0.05	197.2	196.357	3927.14	23.5628
08:11:34	2024-01-14 08:11:34	1b	0.013	0.056	0.056	176.3	172.121	3073.59	39.9567	3.01967	3.12947	42.9763	36.8272		08:11:34	2024-01-14 08:11:34	1b	0.013	0.056	0.056	176.3	155.082	2769.32	36.0012	2.72074	2.81967	38.7219	33.1815		38.4586	42.9763	33.1815	41.3651	35.4465	1.61127	2.26494				08:14:01	2024-01-14 08:14:01	1c	0.005	0.048	0.05	197.2	196.357	3927.14	19.6357
08:12:14	2024-01-14 08:12:14	1b	0.011	0.056	0.056	176.3	172.121	3073.59	33.8095	3.01967	3.12947	36.8291	30.68		08:12:14	2024-01-14 08:12:14	1b	0.011	0.056	0.056	176.3	155.082	2769.32	30.4625	2.72074	2.81967	33.1833	27.6429		32.5419	36.8291	27.6429	35.4483	29.5297	1.3808	1.88688				08:14:32	2024-01-14 08:14:32	1c	0.006	0.05	0.05	197.2	196.357	3927.14	23.5628
08:12:51	2024-01-14 08:12:51	1b	0.009	0.056	0.056	176.3	172.121	3073.59	27.6623	3.01967	3.12947	30.682	24.5328		08:12:51	2024-01-14 08:12:51	1b	0.009	0.056	0.056	176.3	155.082	2769.32	24.9239	2.72074	2.81967	27.6446	22.1042		26.6252	30.682	22.1042	29.5316	23.613	1.15033	1.50882				08:15:01	2024-01-14 08:15:01	1c	0.005	0.05	0.05	197.2	196.357	3927.14	19.6357
08:13:49	2024-01-14 08:13:49	1b	0.009	0.056	0.056	176.3	172.121	3073.59	27.6623	3.01967	3.12947	30.682	24.5328		08:13:49	2024-01-14 08:13:49	1b	0.009	0.056	0.056	176.3	155.082	2769.32	24.9239	2.72074	2.81967	27.6446	22.1042		26.6252	30.682	22.1042	29.5316	23.613	1.15033	1.50882				08:16:23	2024-01-14 08:16:23	1c	0.006	0.05	0.05	197.2	196.357	3927.14	23.5628
08:14:01	2024-01-14 08:14:01	1b	0.01	0.056	0.056	176.3	172.121	3073.59	30.7359	3.01967	3.12947	33.7556	27.6064		08:14:01	2024-01-14 08:14:01	1b	0.01	0.056	0.056	176.3	155.082	2769.32	27.6932	2.72074	2.81967	30.414	24.8735		29.5835	33.7556	24.8735	32.49	26.5714	1.26557	1.69785				08:16:41	2024-01-14 08:16:41	1c	0.007	0.05	0.05	197.2	196.357	3927.14	27.49
08:14:32	2024-01-14 08:14:32	1b	0.013	0.056	0.056	176.3	172.121	3073.59	39.9567	3.01967	3.12947	42.9763	36.8272		08:14:32	2024-01-14 08:14:32	1b	0.013	0.056	0.056	176.3	155.082	2769.32	36.0012	2.72074	2.81967	38.7219	33.1815		38.4586	42.9763	33.1815	41.3651	35.4465	1.61127	2.26494				08:17:21	2024-01-14 08:17:21	1c	0.006	0.053	0.053	197.2	196.357	3704.85	22.2291
08:15:01	2024-01-14 08:15:01	1b	0.012	0.056	0.056	176.3	172.121	3073.59	36.8831	3.01967	3.12947	39.9027	33.7536		08:15:01	2024-01-14 08:15:01	1b	0.012	0.056	0.056	176.3	155.082	2769.32	33.2319	2.72074	2.81967	35.9526	30.4122		35.5002	39.9027	30.4122	38.4067	32.4881	1.49604	2.07591				08:18:29	2024-01-14 08:18:29	1c	0.006	0.053	0.053	197.2	196.357	3704.85	22.2291
08:16:23	2024-01-14 08:16:23	1b	0.01	0.056	0.056	176.3	172.121	3073.59	30.7359	3.01967	3.12947	33.7556	27.6064		08:16:23	2024-01-14 08:16:23	1b	0.01	0.056	0.056	176.3	155.082	2769.32	27.6932	2.72074	2.81967	30.414	24.8735		29.5835	33.7556	24.8735	32.49	26.5714	1.26557	1.69785				08:18:54	2024-01-14 08:18:54	1c	0.005	0.053	0.053	197.2	196.357	3704.85	18.5242
08:16:41	2024-01-14 08:16:41	1b	0.01	0.056	0.056	176.3	172.121	3073.59	30.7359	3.01967	3.12947	33.7556	27.6064		08:16:41	2024-01-14 08:16:41	1b	0.01	0.056	0.056	176.3	155.082	2769.32	27.6932	2.72074	2.81967	30.414	24.8735		29.5835	33.7556	24.8735	32.49	26.5714	1.26557	1.69785				08:19:53	2024-01-14 08:19:53	1c	0.006	0.053	0.053	197.2	196.357	3704.85	22.2291
08:17:21	2024-01-14 08:17:21	1b	0.012	0.06	0.06	176.3	172.121	2868.68	34.4242	2.82166	2.9173	37.2459	31.5069		08:17:21	2024-01-14 08:17:21	1b	0.012	0.06	0.06	176.3	155.082	2584.7	31.0164	2.54233	2.62851	33.5587	28.3879		33.1336	37.2459	28.3879	35.8494	30.3256	1.39643	1.93773				08:20:25	2024-01-14 08:20:25	1c	0.005	0.053	0.053	197.2	196.357	3704.85	18.5242
08:18:29	2024-01-14 08:18:29	1b	0.012	0.06	0.06	176.3	172.121	2868.68	34.4242	2.82166	2.9173	37.2459	31.5069		08:18:29	2024-01-14 08:18:29	1b	0.012	0.06	0.06	176.3	155.082	2584.7	31.0164	2.54233	2.62851	33.5587	28.3879		33.1336	37.2459	28.3879	35.8494	30.3256	1.39643	1.93773				08:21:30	2024-01-14 08:21:30	1c	0.007	0.053	0.053	197.2	196.357	3704.85	25.9339
08:18:54	2024-01-14 08:18:54	1b	0.011	0.06	0.06	176.3	172.121	2868.68	31.5555	2.82166	2.9173	34.3772	28.6382		08:18:54	2024-01-14 08:18:54	1b	0.011	0.06	0.06	176.3	155.082	2584.7	28.4317	2.54233	2.62851	30.974	25.8032		30.3724	34.3772	25.8032	33.0883	27.5645	1.28887	1.7613				08:23:14	2024-01-14 08:23:14	1c	0.004	0.053	0.053	197.2	196.357	3704.85	14.8194
08:19:53	2024-01-14 08:19:53	1b	0.015	0.06	0.06	176.3	172.121	2868.68	43.0302	2.82166	2.9173	45.8519	40.1129		08:19:53	2024-01-14 08:19:53	1b	0.015	0.06	0.06	176.3	155.082	2584.7	38.7705	2.54233	2.62851	41.3128	36.142		41.417	45.8519	36.142	44.1328	38.609	1.71908	2.46702				08:25:29	2024-01-14 08:25:29	1c	0.007	0.053	0.053	197.2	196.357	3704.85	25.9339
08:20:25	2024-01-14 08:20:25	1b	0.013	0.06	0.06	176.3	172.121	2868.68	37.2929	2.82166	2.9173	40.1145	34.3756		08:20:25	2024-01-14 08:20:25	1b	0.013	0.06	0.06	176.3	155.082	2584.7	33.6011	2.54233	2.62851	36.1434	30.9726		35.8947	40.1145	30.9726	38.6106	33.0868	1.50398	2.11416				08:28:30	2024-01-14 08:28:30	1c	0.006	0.053	0.053	197.2	196.357	3704.85	22.2291
08:21:30	2024-01-14 08:21:30	1b	0.018	0.06	0.06	176.3	172.121	2868.68	51.6363	2.82166	2.9173	54.458	48.719		08:21:30	2024-01-14 08:21:30	1b	0.018	0.06	0.06	176.3	155.082	2584.7	46.5246	2.54233	2.62851	49.0669	43.8961		49.7003	54.458	43.8961	52.4162	46.8924	2.04174	2.99631				08:31:04	2024-01-14 08:31:04	1c	0.007	0.053	0.053	197.2	196.357	3704.85	25.9339
08:23:14	2024-01-14 08:23:14	1b	0.012	0.06	0.06	176.3	172.121	2868.68	34.4242	2.82166	2.9173	37.2459	31.5069		08:23:14	2024-01-14 08:23:14	1b	0.012	0.06	0.06	176.3	155.082	2584.7	31.0164	2.54233	2.62851	33.5587	28.3879		33.1336	37.2459	28.3879	35.8494	30.3256	1.39643	1.93773				08:35:49	2024-01-14 08:35:49	1c	0.006	0.053	0.053	197.2	196.357	3704.85	22.2291
08:25:29	2024-01-14 08:25:29	1b	0.013	0.06	0.06	176.3	172.121	2868.68	37.2929	2.82166	2.9173	40.1145	34.3756		08:25:29	2024-01-14 08:25:29	1b	0.013	0.06	0.06	176.3	155.082	2584.7	33.6011	2.54233	2.62851	36.1434	30.9726		35.8947	40.1145	30.9726	38.6106	33.0868	1.50398	2.11416				08:38:23	2024-01-14 08:38:23	1c	0.004	0.05	0.05	197.2	196.357	3927.14	15.7086
08:28:30	2024-01-14 08:28:30	1b	0.012	0.06	0.06	176.3	172.121	2868.68	34.4242	2.82166	2.9173	37.2459	31.5069		08:28:30	2024-01-14 08:28:30	1b	0.012	0.06	0.06	176.3	155.082	2584.7	31.0164	2.54233	2.62851	33.5587	28.3879		33.1336	37.2459	28.3879	35.8494	30.3256	1.39643	1.93773				08:41:30	2024-01-14 08:41:30	1c	0.005	0.05	0.05	197.2	196.357	3927.14	19.6357
08:31:04	2024-01-14 08:31:04	1b	0.016	0.06	0.06	176.3	172.121	2868.68	45.8989	2.82166	2.9173	48.7206	42.9816		08:31:04	2024-01-14 08:31:04	1b	0.016	0.06	0.06	176.3	155.082	2584.7	41.3552	2.54233	2.62851	43.8975	38.7267		44.1781	48.7206	38.7267	46.8939	41.3702	1.82664	2.64345				08:44:37	2024-01-14 08:44:37	1c	0.004	0.05	0.05	197.2	196.357	3927.14	15.7086
08:35:49	2024-01-14 08:35:49	1b	0.01	0.06	0.06	176.3	172.121	2868.68	28.6868	2.82166	2.9173	31.5085	25.7695		08:35:49	2024-01-14 08:35:49	1b	0.01	0.06	0.06	176.3	155.082	2584.7	25.847	2.54233	2.62851	28.3893	23.2185		27.6113	31.5085	23.2185	30.3272	24.8034	1.18132	1.58487				08:47:43	2024-01-14 08:47:43	1c	0.004	0.05	0.05	197.2	196.357	3927.14	15.7086
08:38:23	2024-01-14 08:38:23	1b	0.008	0.054	0.054	176.3	172.121	3187.43	25.4994	3.12947	3.24757	28.6289	22.2518		08:38:23	2024-01-14 08:38:23	1b	0.008	0.054	0.054	176.3	155.082	2871.89	22.9751	2.81967	2.92608	25.7948	20.049		24.5434	28.6289	20.049	27.5555	21.4176	1.07336	1.36853				08:50:53	2024-01-14 08:50:53	1c	0.003	0.05	0.05	197.2	196.357	3927.14	11.7814
08:41:30	2024-01-14 08:41:30	1b	0.009	0.054	0.054	176.3	172.121	3187.43	28.6868	3.12947	3.24757	31.8163	25.4393		08:41:30	2024-01-14 08:41:30	1b	0.009	0.054	0.054	176.3	155.082	2871.89	25.847	2.81967	2.92608	28.6667	22.9209		27.6113	31.8163	22.9209	30.6234	24.4855	1.19286	1.56456				08:53:57	2024-01-14 08:53:57	1c	0.003	0.05	0.05	197.2	196.357	3927.14	11.7814
08:44:37	2024-01-14 08:44:37	1b	0.008	0.054	0.054	176.3	172.121	3187.43	25.4994	3.12947	3.24757	28.6289	22.2518		08:44:37	2024-01-14 08:44:37	1b	0.008	0.054	0.054	176.3	155.082	2871.89	22.9751	2.81967	2.92608	25.7948	20.049		24.5434	28.6289	20.049	27.5555	21.4176	1.07336	1.36853				08:56:33	2024-01-14 08:56:33	1c	0.005	0.05	0.05	197.2	196.357	3927.14	19.6357
08:47:43	2024-01-14 08:47:43	1b	0.008	0.054	0.054	176.3	172.121	3187.43	25.4994	3.12947	3.24757	28.6289	22.2518		08:47:43	2024-01-14 08:47:43	1b	0.008	0.054	0.054	176.3	155.082	2871.89	22.9751	2.81967	2.92608	25.7948	20.049		24.5434	28.6289	20.049	27.5555	21.4176	1.07336	1.36853				08:59:09	2024-01-14 08:59:09	1c	0.003	0.05	0.05	197.2	196.357	3927.14	11.7814
08:50:53	2024-01-14 08:50:53	1b	0.007	0.054	0.054	176.3	172.121	3187.43	22.312	3.12947	3.24757	25.4415	19.0644		08:50:53	2024-01-14 08:50:53	1b	0.007	0.054	0.054	176.3	155.082	2871.89	20.1032	2.81967	2.92608	22.9229	17.1772		21.4755	25.4415	17.1772	24.4876	18.3496	0.953853	1.1725				09:04:01	2024-01-14 09:04:01	1c	0.004	0.05	0.05	197.2	196.357	3927.14	15.7086
08:53:57	2024-01-14 08:53:57	1b	0.006	0.054	0.054	176.3	172.121	3187.43	19.1246	3.12947	3.24757	22.254	15.877		08:53:57	2024-01-14 08:53:57	1b	0.006	0.054	0.054	176.3	155.082	2871.89	17.2313	2.81967	2.92608	20.051	14.3053		18.4075	22.254	14.3053	21.4197	15.2817	0.83435	0.976465				09:08:53	2024-01-14 09:08:53	1c	0.003	0.05	0.05	197.2	196.357	3927.14	11.7814
08:56:33	2024-01-14 08:56:33	1b	0.006	0.054	0.054	176.3	172.121	3187.43	19.1246	3.12947	3.24757	22.254	15.877		08:56:33	2024-01-14 08:56:33	1b	0.006	0.054	0.054	176.3	155.082	2871.89	17.2313	2.81967	2.92608	20.051	14.3053		18.4075	22.254	14.3053	21.4197	15.2817	0.83435	0.976465				09:10:55	2024-01-14 09:10:55	1c	0.003	0.05	0.05	197.2	196.357	3927.14	11.7814
08:59:09	2024-01-14 08:59:09	1b	0.004	0.054	0.054	176.3	172.121	3187.43	12.7497	3.12947	3.24757	15.8792	9.50214		08:59:09	2024-01-14 08:59:09	1b	0.004	0.054	0.054	176.3	155.082	2871.89	11.4876	2.81967	2.92608	14.3072	8.56148		12.2717	15.8792	8.56148	15.2838	9.14588	0.595344	0.584399				09:15:46	2024-01-14 09:15:46	1c	0.003	0.05	0.05	197.2	196.357	3927.14	11.7814
09:04:01	2024-01-14 09:04:01	1b	0.004	0.054	0.054	176.3	172.121	3187.43	12.7497	3.12947	3.24757	15.8792	9.50214		09:04:01	2024-01-14 09:04:01	1b	0.004	0.054	0.054	176.3	155.082	2871.89	11.4876	2.81967	2.92608	14.3072	8.56148		12.2717	15.8792	8.56148	15.2838	9.14588	0.595344	0.584399				09:20:07	2024-01-14 09:20:07	1c	0.004	0.06	0.06	197.2	196.357	3272.62	13.0905
09:08:53	2024-01-14 09:08:53	1b	0.007	0.054	0.054	176.3	172.121	3187.43	22.312	3.12947	3.24757	25.4415	19.0644		09:08:53	2024-01-14 09:08:53	1b	0.007	0.054	0.054	176.3	155.082	2871.89	20.1032	2.81967	2.92608	22.9229	17.1772		21.4755	25.4415	17.1772	24.4876	18.3496	0.953853	1.1725				09:25:08	2024-01-14 09:25:08	1c	0.006	0.06	0.06	197.2	196.357	3272.62	19.6357
09:10:55	2024-01-14 09:10:55	1b	0.006	0.054	0.054	176.3	172.121	3187.43	19.1246	3.12947	3.24757	22.254	15.877		09:10:55	2024-01-14 09:10:55	1b	0.006	0.054	0.054	176.3	155.082	2871.89	17.2313	2.81967	2.92608	20.051	14.3053		18.4075	22.254	14.3053	21.4197	15.2817	0.83435	0.976465				09:30:09	2024-01-14 09:30:09	1c	0.008	0.06	0.06	197.2	196.357	3272.62	26.1809
09:15:46	2024-01-14 09:15:46	1b	0.007	0.054	0.054	176.3	172.121	3187.43	22.312	3.12947	3.24757	25.4415	19.0644		09:15:46	2024-01-14 09:15:46	1b	0.007	0.054	0.054	176.3	155.082	2871.89	20.1032	2.81967	2.92608	22.9229	17.1772		21.4755	25.4415	17.1772	24.4876	18.3496	0.953853	1.1725				09:35:10	2024-01-14 09:35:10	1c	0.006	0.06	0.06	197.2	196.357	3272.62	19.6357
09:20:07	2024-01-14 09:20:07	1b	0.01	0.067	0.067	176.3	172.121	2568.97	25.6897	2.53119	2.60789	28.2209	23.0818		09:20:07	2024-01-14 09:20:07	1b	0.01	0.067	0.067	176.3	155.082	2314.66	23.1466	2.28062	2.34973	25.4272	20.7968		24.7265	28.2209	20.7968	27.1628	22.2164	1.05806	1.41957				09:40:09	2024-01-14 09:40:09	1c	0.005	0.06	0.06	197.2	196.357	3272.62	16.3631
09:25:08	2024-01-14 09:25:08	1b	0.011	0.067	0.067	176.3	172.121	2568.97	28.2587	2.53119	2.60789	30.7899	25.6508		09:25:08	2024-01-14 09:25:08	1b	0.011	0.067	0.067	176.3	155.082	2314.66	25.4612	2.28062	2.34973	27.7418	23.1115		27.1992	30.7899	23.1115	29.6355	24.6891	1.15438	1.57757				09:44:54	2024-01-14 09:44:54	1c	0.005	0.06	0.06	197.2	196.357	3272.62	16.3631
09:30:09	2024-01-14 09:30:09	1b	0.016	0.067	0.067	176.3	172.121	2568.97	41.1035	2.53119	2.60789	43.6347	38.4956		09:30:09	2024-01-14 09:30:09	1b	0.016	0.067	0.067	176.3	155.082	2314.66	37.0345	2.28062	2.34973	39.3151	34.6848		39.5625	43.6347	34.6848	41.9988	37.0523	1.63596	2.36755				09:50:00	2024-01-14 09:50:00	1c	0.003	0.06	0.06	197.2	196.357	3272.62	9.81785
09:35:10	2024-01-14 09:35:10	1b	0.01	0.067	0.067	176.3	172.121	2568.97	25.6897	2.53119	2.60789	28.2209	23.0818		09:35:10	2024-01-14 09:35:10	1b	0.01	0.067	0.067	176.3	155.082	2314.66	23.1466	2.28062	2.34973	25.4272	20.7968		24.7265	28.2209	20.7968	27.1628	22.2164	1.05806	1.41957				09:55:04	2024-01-14 09:55:04	1c	0.004	0.06	0.06	197.2	196.357	3272.62	13.0905
09:40:09	2024-01-14 09:40:09	1b	0.01	0.067	0.067	176.3	172.121	2568.97	25.6897	2.53119	2.60789	28.2209	23.0818		09:40:09	2024-01-14 09:40:09	1b	0.01	0.067	0.067	176.3	155.082	2314.66	23.1466	2.28062	2.34973	25.4272	20.7968		24.7265	28.2209	20.7968	27.1628	22.2164	1.05806	1.41957				09:59:46	2024-01-14 09:59:46	1c	0.004	0.06	0.06	197.2	196.357	3272.62	13.0905
09:44:54	2024-01-14 09:44:54	1b	0.009	0.067	0.067	176.3	172.121	2568.97	23.1207	2.53119	2.60789	25.6519	20.5128		09:44:54	2024-01-14 09:44:54	1b	0.009	0.067	0.067	176.3	155.082	2314.66	20.8319	2.28062	2.34973	23.1125	18.4822		22.2539	25.6519	18.4822	24.6902	19.7438	0.961744	1.26158				10:04:57	2024-01-14 10:04:57	1c	0.005	0.06	0.06	197.2	196.357	3272.62	16.3631
09:50:00	2024-01-14 09:50:00	1b	0.009	0.067	0.067	176.3	172.121	2568.97	23.1207	2.53119	2.60789	25.6519	20.5128		09:50:00	2024-01-14 09:50:00	1b	0.009	0.067	0.067	176.3	155.082	2314.66	20.8319	2.28062	2.34973	23.1125	18.4822		22.2539	25.6519	18.4822	24.6902	19.7438	0.961744	1.26158				10:10:00	2024-01-14 10:10:00	1c	0.005	0.06	0.06	197.2	196.357	3272.62	16.3631
09:55:04	2024-01-14 09:55:04	1b	0.01	0.067	0.067	176.3	172.121	2568.97	25.6897	2.53119	2.60789	28.2209	23.0818		09:55:04	2024-01-14 09:55:04	1b	0.01	0.067	0.067	176.3	155.082	2314.66	23.1466	2.28062	2.34973	25.4272	20.7968		24.7265	28.2209	20.7968	27.1628	22.2164	1.05806	1.41957				10:17:35	2024-01-14 10:17:35	1c	0.006	0.062	0.062	197.2	196.357	3167.05	19.0023
09:59:46	2024-01-14 09:59:46	1b	0.006	0.067	0.067	176.3	172.121	2568.97	15.4138	2.53119	2.60789	17.945	12.8059		09:59:46	2024-01-14 09:59:46	1b	0.006	0.067	0.067	176.3	155.082	2314.66	13.8879	2.28062	2.34973	16.1686	11.5382		14.8359	17.945	11.5382	17.2722	12.3258	0.672796	0.787589				10:20:05	2024-01-14 10:20:05	1c	0.007	0.062	0.062	197.2	196.357	3167.05	22.1693
10:04:57	2024-01-14 10:04:57	1b	0.009	0.067	0.067	176.3	172.121	2568.97	23.1207	2.53119	2.60789	25.6519	20.5128		10:04:57	2024-01-14 10:04:57	1b	0.009	0.067	0.067	176.3	155.082	2314.66	20.8319	2.28062	2.34973	23.1125	18.4822		22.2539	25.6519	18.4822	24.6902	19.7438	0.961744	1.26158				10:40:06	2024-01-14 10:40:06	1c	0.004	0.06	0.06	197.2	196.357	3272.62	13.0905
10:10:00	2024-01-14 10:10:00	1b	0.013	0.067	0.067	176.3	172.121	2568.97	33.3966	2.53119	2.60789	35.9278	30.7887		10:10:00	2024-01-14 10:10:00	1b	0.013	0.067	0.067	176.3	155.082	2314.66	30.0905	2.28062	2.34973	32.3712	27.7408		32.1445	35.9278	27.7408	34.5808	29.6344	1.34701	1.89356				10:45:02	2024-01-14 10:45:02	1c	0.005	0.055	0.055	197.2	196.357	3570.13	17.8506
10:17:35	2024-01-14 10:17:35	1b	0.011	0.077	0.077	176.3	172.121	2235.34	24.5887	2.20668	2.26475	26.7954	22.324		10:17:35	2024-01-14 10:17:35	1b	0.011	0.077	0.077	176.3	155.082	2014.05	22.1546	1.98823	2.04055	24.1428	20.114		23.6668	26.7954	20.114	25.7908	21.487	1.00462	1.37297				10:49:55	2024-01-14 10:49:55	1c	0.005	0.055	0.055	197.2	196.357	3570.13	17.8506
10:20:05	2024-01-14 10:20:05	1b	0.015	0.077	0.077	176.3	172.121	2235.34	33.5301	2.20668	2.26475	35.7367	31.2653		10:20:05	2024-01-14 10:20:05	1b	0.015	0.077	0.077	176.3	155.082	2014.05	30.2108	1.98823	2.04055	32.199	28.1702		32.2729	35.7367	28.1702	34.3969	30.0931	1.33985	1.92288				10:54:58	2024-01-14 10:54:58	1c	0.005	0.055	0.055	197.2	196.357	3570.13	17.8506
10:40:06	2024-01-14 10:40:06	1b	0.011	0.068	0.068	176.3	172.121	2531.19	27.8431	2.49451	2.56897	30.3376	25.2741		10:40:06	2024-01-14 10:40:06	1b	0.011	0.068	0.068	176.3	155.082	2280.62	25.0868	2.24757	2.31466	27.3344	22.7721		26.7992	30.3376	22.7721	29.2002	24.3266	1.13742	1.55441				10:59:47	2024-01-14 10:59:47	1c	0.005	0.055	0.055	197.2	196.357	3570.13	17.8506
10:45:02	2024-01-14 10:45:02	1b	0.009	0.062	0.062	176.3	172.121	2776.14	24.9853	2.73208	2.82166	27.7174	22.1636		10:45:02	2024-01-14 10:45:02	1b	0.009	0.062	0.062	176.3	155.082	2501.32	22.5119	2.46162	2.54233	24.9735	19.9696		24.0486	27.7174	19.9696	26.6782	21.3327	1.03918	1.36311				11:03:01	2024-01-14 11:03:01	1c	0.006	0.085	0.085	197.2	196.357	2310.08	13.8605
10:49:55	2024-01-14 10:49:55	1b	0.01	0.062	0.062	176.3	172.121	2776.14	27.7614	2.73208	2.82166	30.4935	24.9398		10:49:55	2024-01-14 10:49:55	1b	0.01	0.062	0.062	176.3	155.082	2501.32	25.0132	2.46162	2.54233	27.4749	22.4709		26.7206	30.4935	22.4709	29.3503	24.0047	1.14327	1.53384
10:54:58	2024-01-14 10:54:58	1b	0.009	0.062	0.062	176.3	172.121	2776.14	24.9853	2.73208	2.82166	27.7174	22.1636		10:54:58	2024-01-14 10:54:58	1b	0.009	0.062	0.062	176.3	155.082	2501.32	22.5119	2.46162	2.54233	24.9735	19.9696		24.0486	27.7174	19.9696	26.6782	21.3327	1.03918	1.36311
10:59:47	2024-01-14 10:59:47	1b	0.008	0.062	0.062	176.3	172.121	2776.14	22.2092	2.73208	2.82166	24.9412	19.3875		10:59:47	2024-01-14 10:59:47	1b	0.008	0.062	0.062	176.3	155.082	2501.32	20.0106	2.46162	2.54233	22.4722	17.4683		21.3765	24.9412	17.4683	24.0061	18.6606	0.935099	1.19237
11:03:01	2024-01-14 11:03:01	1b	0.016	0.13	0.13	176.3	172.121	1324.01	21.1841	1.3139	1.33427	22.498	19.8499		11:03:01	2024-01-14 11:03:01	1b	0.016	0.13	0.13	176.3	155.082	1192.94	19.087	1.18383	1.20219	20.2709	17.8848		20.3899	22.498	17.8848	21.6545	19.1056	0.843498	1.2208
[truncated: 341 more columns]

## Sheet: MARCH ANGULAR UNCERTAINTY
North											FISSURE 2a TAKING THE ANGLE FROM THE NORTHERN TIP OF THE POTENTIAL WEBCAM AREA														FISSURE 2a TAKING THE ANGLE FROM THE SOUTHERN TIP OF THE POTENTIAL WEBCAM AREA																								FISSURE 2b TAKING THE ANGLE FROM THE NORTHERN TIP OF THE POTENTIAL WEBCAM AREA
fissure	webcam	webcam bearing	fissure bearing	real fissure length	e	g	apparent fissure length				Time	Time and date	Fissure	Fire fountain height on screen (m)	Fissure length on screen at time (m)	Total fissure length on screen (m)	Real apparent fissure length (m)	Scaling factor	Real fire fountain height (m)	Positive uncertainty	Negative uncertainty	Lower bound	Upper bound		Time	Time and date	Fissure	Fire fountain height on screen (m)	Fissure length on screen at time (m)	Total fissure length on screen (m)	Real apparent fissure length (m)	Scaling factor	Real fire fountain height (m)	Positive uncertainty	Negative uncertainty	Lower bound	Upper bound		Fire fountain height	Upper Bound with angular uncertainty	Lower Bound with angular uncertainty	upper bound from just ruler uncertainty	lower bound from just ruler uncertainty	Upper difference	lower difference				Time
											20:27:23	2024-03-16 20:27:23	2a	0.005	0.006	0.076	179.654	2363.87	11.8193	2.33317	2.39539	9.48618	14.2147		20:27:23	2024-03-16 20:27:23	2a	0.005	0.006	0.076	174.815	2300.2	11.501	2.27033	2.33087	9.23067	13.8319		11.7023	14.2147	9.23067	14.0739	9.39221	0.140805	0.161542				20:23:53
1c	lang	49.2	33.1	127.3	277.7	73.9	126.152				20:27:27	2024-03-16 20:27:27	2a	0.007	0.01	0.076	179.654	2363.87	16.5471	2.33317	2.39539	14.2139	18.9425		20:27:27	2024-03-16 20:27:27	2a	0.007	0.01	0.076	174.815	2300.2	16.1014	2.27033	2.33087	13.8311	18.4323		16.3832	18.9425	13.8311	18.7548	14.0731	0.187636	0.242051				20:23:57
2a	lang	52	26.4	183.4	281.6	64.4	179.654				20:27:31	2024-03-16 20:27:31	2a	0.008	0.013	0.076	179.654	2363.87	18.911	2.33317	2.39539	16.5778	21.3063		20:27:31	2024-03-16 20:27:31	2a	0.008	0.013	0.076	174.815	2300.2	18.4016	2.27033	2.33087	16.1313	20.7325		18.7236	21.3063	16.1313	21.0953	16.4136	0.211051	0.282306				20:24:00
2b	lang	55.7	30.4	305.2	273.9	64.7	304.493				20:27:41	2024-03-16 20:27:41	2a	0.01	0.022	0.076	179.654	2363.87	23.6387	2.33317	2.39539	21.3055	26.0341		20:27:41	2024-03-16 20:27:41	2a	0.01	0.022	0.076	174.815	2300.2	23.002	2.27033	2.33087	20.7317	25.3329		23.4045	26.0341	20.7317	25.7762	21.0945	0.257882	0.362815				20:24:06
2c	lang	60	27.9	284.3	272.1	57.9	284.109				20:27:59	2024-03-16 20:27:59	2a	0.012	0.028	0.076	179.654	2363.87	28.3664	2.33317	2.39539	26.0333	30.7618		20:27:59	2024-03-16 20:27:59	2a	0.012	0.028	0.076	174.815	2300.2	27.6024	2.27033	2.33087	25.3321	29.9333		28.0855	30.7618	25.3321	30.4571	25.7754	0.304713	0.443325				20:24:12
2d	lang	62.5	34.9	75.8	262.6	62.4	75.1687				20:28:10	2024-03-16 20:28:10	2a	0.013	0.034	0.076	179.654	2363.87	30.7303	2.33317	2.39539	28.3971	33.1257		20:28:10	2024-03-16 20:28:10	2a	0.013	0.034	0.076	174.815	2300.2	29.9026	2.27033	2.33087	27.6323	32.2335		30.4259	33.1257	27.6323	32.7976	28.1158	0.328128	0.483579				20:24:18
2e	lang	64.3	32.4	59.9	263.3	58.1	59.4909				20:28:25	2024-03-16 20:28:25	2a	0.015	0.038	0.076	179.654	2363.87	35.458	2.33317	2.39539	33.1249	37.8534		20:28:25	2024-03-16 20:28:25	2a	0.015	0.038	0.076	174.815	2300.2	34.503	2.27033	2.33087	32.2327	36.8339		35.1068	37.8534	32.2327	37.4785	32.7968	0.374959	0.564089				20:24:25
2f	lang	66.3	27.2	277.3	266.5	50.9	276.783				20:28:41	2024-03-16 20:28:41	2a	0.017	0.038	0.076	179.654	2363.87	40.1858	2.33317	2.39539	37.8526	42.5812		20:28:41	2024-03-16 20:28:41	2a	0.017	0.038	0.076	174.815	2300.2	39.1034	2.27033	2.33087	36.8331	41.4343		39.7877	42.5812	36.8331	42.1594	37.4777	0.42179	0.644598				20:24:32
3a	lang	69.3	31.3	348.4	259.4	52	342.455				20:29:03	2024-03-16 20:29:03	2a	0.018	0.048	0.076	179.654	2363.87	42.5497	2.33317	2.39539	40.2165	44.945		20:29:03	2024-03-16 20:29:03	2a	0.018	0.048	0.076	174.815	2300.2	41.4036	2.27033	2.33087	39.1333	43.7345		42.1282	44.945	39.1333	44.4998	39.8181	0.445205	0.684853				20:24:40
3b	lang	72.7	22.4	206.9	264.9	39.7	206.081				20:29:36	2024-03-16 20:29:36	2a	0.018	0.049	0.076	179.654	2363.87	42.5497	2.33317	2.39539	40.2165	44.945		20:29:36	2024-03-16 20:29:36	2a	0.018	0.049	0.076	174.815	2300.2	41.4036	2.27033	2.33087	39.1333	43.7345		42.1282	44.945	39.1333	44.4998	39.8181	0.445205	0.684853				20:24:50
3c	lang	77.2	29.9	133.8	252.9	42.7	127.885				20:30:01	2024-03-16 20:30:01	2a	0.018	0.05	0.076	179.654	2363.87	42.5497	2.33317	2.39539	40.2165	44.945		20:30:01	2024-03-16 20:30:01	2a	0.018	0.05	0.076	174.815	2300.2	41.4036	2.27033	2.33087	39.1333	43.7345		42.1282	44.945	39.1333	44.4998	39.8181	0.445205	0.684853				20:24:59
3d	lang	80	13.8	261.3	266.2	23.8	260.726				20:30:34	2024-03-16 20:30:34	2a	0.018	0.052	0.076	179.654	2363.87	42.5497	2.33317	2.39539	40.2165	44.945		20:30:34	2024-03-16 20:30:34	2a	0.018	0.052	0.076	174.815	2300.2	41.4036	2.27033	2.33087	39.1333	43.7345		42.1282	44.945	39.1333	44.4998	39.8181	0.445205	0.684853				20:25:05
											20:31:02	2024-03-16 20:31:02	2a	0.019	0.055	0.076	179.654	2363.87	44.9135	2.33317	2.39539	42.5804	47.3089		20:31:02	2024-03-16 20:31:02	2a	0.019	0.055	0.076	174.815	2300.2	43.7038	2.27033	2.33087	41.4335	46.0347		44.4686	47.3089	41.4335	46.8403	42.1586	0.468621	0.725108				20:25:19
south											20:32:07	2024-03-16 20:32:07	2a	0.018	0.069	0.076	179.654	2363.87	42.5497	2.33317	2.39539	40.2165	44.945		20:32:07	2024-03-16 20:32:07	2a	0.018	0.069	0.076	174.815	2300.2	41.4036	2.27033	2.33087	39.1333	43.7345		42.1282	44.945	39.1333	44.4998	39.8181	0.445205	0.684853				20:25:27
fissure	webcam	webcam bearing	fissure bearing	real fissure length	e	g	apparent fissure length				20:32:59	2024-03-16 20:32:59	2a	0.019	0.07	0.076	179.654	2363.87	44.9135	2.33317	2.39539	42.5804	47.3089		20:32:59	2024-03-16 20:32:59	2a	0.019	0.07	0.076	174.815	2300.2	43.7038	2.27033	2.33087	41.4335	46.0347		44.4686	47.3089	41.4335	46.8403	42.1586	0.468621	0.725108				20:25:37
											20:34:05	2024-03-16 20:34:05	2a	0.022	0.076	0.076	179.654	2363.87	52.0051	2.33317	2.39539	49.672	54.4005		20:34:05	2024-03-16 20:34:05	2a	0.022	0.076	0.076	174.815	2300.2	50.6044	2.27033	2.33087	48.3341	52.9353		51.49	54.4005	48.3341	53.8617	49.1799	0.538867	0.845872				20:25:45
1c	lang	46	33.1	127.3	280.9	77.1	125.003				20:35:05	2024-03-16 20:35:05	2a	0.017	0.059	0.059	179.654	3044.98	51.7647	2.99424	3.09748	48.7705	54.8622		20:35:05	2024-03-16 20:35:05	2a	0.017	0.059	0.059	174.815	2962.97	50.3705	2.91359	3.01405	47.4569	53.3845		51.252	54.8622	47.4569	54.3188	48.2874	0.543441	0.830521				20:26:02
2a	lang	46	26.4	183.4	287.6	70.4	174.815				20:36:10	2024-03-16 20:36:10	2a	0.018	0.059	0.059	179.654	3044.98	54.8097	2.99424	3.09748	51.8155	57.9072		20:36:10	2024-03-16 20:36:10	2a	0.018	0.059	0.059	174.815	2962.97	53.3334	2.91359	3.01405	50.4199	56.3475		54.2668	57.9072	50.4199	57.3336	51.3022	0.573603	0.882374				20:26:02
2b	lang	47	30.4	305.2	282.6	73.4	297.85				20:37:03	2024-03-16 20:37:03	2a	0.017	0.059	0.059	179.654	3044.98	51.7647	2.99424	3.09748	48.7705	54.8622		20:37:03	2024-03-16 20:37:03	2a	0.017	0.059	0.059	174.815	2962.97	50.3705	2.91359	3.01405	47.4569	53.3845		51.252	54.8622	47.4569	54.3188	48.2874	0.543441	0.830521				20:26:12
2c	lang	48	27.9	284.3	284.1	69.9	275.735				20:38:06	2024-03-16 20:38:06	2a	0.017	0.059	0.059	179.654	3044.98	51.7647	2.99424	3.09748	48.7705	54.8622		20:38:06	2024-03-16 20:38:06	2a	0.017	0.059	0.059	174.815	2962.97	50.3705	2.91359	3.01405	47.4569	53.3845		51.252	54.8622	47.4569	54.3188	48.2874	0.543441	0.830521				20:26:26
2d	lang	49	34.9	75.8	276.1	75.9	75.3708				20:39:00	2024-03-16 20:39:00	2a	0.017	0.059	0.059	179.654	3044.98	51.7647	2.99424	3.09748	48.7705	54.8622		20:39:00	2024-03-16 20:39:00	2a	0.017	0.059	0.059	174.815	2962.97	50.3705	2.91359	3.01405	47.4569	53.3845		51.252	54.8622	47.4569	54.3188	48.2874	0.543441	0.830521				20:26:38
2e	lang	49.1	32.4	59.9	278.5	73.3	59.2421				20:40:07	2024-03-16 20:40:07	2a	0.017	0.059	0.059	179.654	3044.98	51.7647	2.99424	3.09748	48.7705	54.8622		20:40:07	2024-03-16 20:40:07	2a	0.017	0.059	0.059	174.815	2962.97	50.3705	2.91359	3.01405	47.4569	53.3845		51.252	54.8622	47.4569	54.3188	48.2874	0.543441	0.830521				20:26:48
2f	lang	50.2	27.2	277.3	282.6	67	270.622				20:43:02	2024-03-16 20:43:02	2a	0.018	0.059	0.059	179.654	3044.98	54.8097	2.99424	3.09748	51.8155	57.9072		20:43:02	2024-03-16 20:43:02	2a	0.018	0.059	0.059	174.815	2962.97	53.3334	2.91359	3.01405	50.4199	56.3475		54.2668	57.9072	50.4199	57.3336	51.3022	0.573603	0.882374				20:27:05
3a	lang	51.9	31.3	348.4	276.8	69.4	345.949				20:46:06	2024-03-16 20:46:06	2a	0.017	0.059	0.059	179.654	3044.98	51.7647	2.99424	3.09748	48.7705	54.8622		20:46:06	2024-03-16 20:46:06	2a	0.017	0.059	0.059	174.815	2962.97	50.3705	2.91359	3.01405	47.4569	53.3845		51.252	54.8622	47.4569	54.3188	48.2874	0.543441	0.830521				20:27:23
3b	lang	53.8	22.4	206.9	283.8	58.6	200.928				20:47:48	2024-03-16 20:47:48	2a	0.017	0.059	0.059	179.654	3044.98	51.7647	2.99424	3.09748	48.7705	54.8622		20:47:48	2024-03-16 20:47:48	2a	0.017	0.059	0.059	174.815	2962.97	50.3705	2.91359	3.01405	47.4569	53.3845		51.252	54.8622	47.4569	54.3188	48.2874	0.543441	0.830521				20:27:41
3c	lang	55.3	29.9	133.8	274.8	64.6	133.331				20:49:57	2024-03-16 20:49:57	2a	0.01	0.032	0.032	179.654	5614.19	56.1419	5.44406	5.79529	50.6978	61.9372		20:49:57	2024-03-16 20:49:57	2a	0.01	0.032	0.032	174.815	5462.97	54.6297	5.29743	5.6392	49.3323	60.2689		55.5858	61.9372	49.3323	61.3237	50.1957	0.613522	0.863342				20:27:59
3d	lang	57.4	13.8	261.3	288.8	46.4	247.359				20:55:04	2024-03-16 20:55:04	2a	0.009	0.032	0.032	179.654	5614.19	50.5277	5.44406	5.79529	45.0837	56.323		20:55:04	2024-03-16 20:55:04	2a	0.009	0.032	0.032	174.815	5462.97	49.1668	5.29743	5.6392	43.8693	54.806		50.0272	56.323	43.8693	55.7651	44.6371	0.557911	0.767737				20:28:10
											20:59:55	2024-03-16 20:59:55	2a	0.009	0.032	0.032	179.654	5614.19	50.5277	5.44406	5.79529	45.0837	56.323		20:59:55	2024-03-16 20:59:55	2a	0.009	0.032	0.032	174.815	5462.97	49.1668	5.29743	5.6392	43.8693	54.806		50.0272	56.323	43.8693	55.7651	44.6371	0.557911	0.767737				20:28:25
											21:00:06	2024-03-16 21:00:06	2a	0.009	0.032	0.032	179.654	5614.19	50.5277	5.44406	5.79529	45.0837	56.323		21:00:06	2024-03-16 21:00:06	2a	0.009	0.032	0.032	174.815	5462.97	49.1668	5.29743	5.6392	43.8693	54.806		50.0272	56.323	43.8693	55.7651	44.6371	0.557911	0.767737				20:28:41
											21:03:08	2024-03-16 21:03:08	2a	0.008	0.032	0.032	179.654	5614.19	44.9135	5.44406	5.79529	39.4695	50.7088		21:03:08	2024-03-16 21:03:08	2a	0.008	0.032	0.032	174.815	5462.97	43.7038	5.29743	5.6392	38.4064	49.343		44.4686	50.7088	38.4064	50.2065	39.0785	0.502299	0.672132				20:29:03
											21:06:10	2024-03-16 21:06:10	2a	0.008	0.032	0.032	179.654	5614.19	44.9135	5.44406	5.79529	39.4695	50.7088		21:06:10	2024-03-16 21:06:10	2a	0.008	0.032	0.032	174.815	5462.97	43.7038	5.29743	5.6392	38.4064	49.343		44.4686	50.7088	38.4064	50.2065	39.0785	0.502299	0.672132				20:29:36
											21:09:43	2024-03-16 21:09:43	2a	0.008	0.032	0.032	179.654	5614.19	44.9135	5.44406	5.79529	39.4695	50.7088		21:09:43	2024-03-16 21:09:43	2a	0.008	0.032	0.032	174.815	5462.97	43.7038	5.29743	5.6392	38.4064	49.343		44.4686	50.7088	38.4064	50.2065	39.0785	0.502299	0.672132				20:30:01
											21:15:06	2024-03-16 21:15:06	2a	0.008	0.032	0.032	179.654	5614.19	44.9135	5.44406	5.79529	39.4695	50.7088		21:15:06	2024-03-16 21:15:06	2a	0.008	0.032	0.032	174.815	5462.97	43.7038	5.29743	5.6392	38.4064	49.343		44.4686	50.7088	38.4064	50.2065	39.0785	0.502299	0.672132				20:30:34
											21:20:06	2024-03-16 21:20:06	2a	0.007	0.032	0.032	179.654	5614.19	39.2993	5.44406	5.79529	33.8553	45.0946		21:20:06	2024-03-16 21:20:06	2a	0.007	0.032	0.032	174.815	5462.97	38.2408	5.29743	5.6392	32.9434	43.88		38.9101	45.0946	32.9434	44.6479	33.5199	0.446687	0.576527				20:31:02
											21:25:08	2024-03-16 21:25:08	2a	0.007	0.032	0.032	179.654	5614.19	39.2993	5.44406	5.79529	33.8553	45.0946		21:25:08	2024-03-16 21:25:08	2a	0.007	0.032	0.032	174.815	5462.97	38.2408	5.29743	5.6392	32.9434	43.88		38.9101	45.0946	32.9434	44.6479	33.5199	0.446687	0.576527				20:32:07
											21:30:03	2024-03-16 21:30:03	2a	0.007	0.032	0.032	179.654	5614.19	39.2993	5.44406	5.79529	33.8553	45.0946		21:30:03	2024-03-16 21:30:03	2a	0.007	0.032	0.032	174.815	5462.97	38.2408	5.29743	5.6392	32.9434	43.88		38.9101	45.0946	32.9434	44.6479	33.5199	0.446687	0.576527				20:32:59
											21:35:08	2024-03-16 21:35:08	2a	0.007	0.032	0.032	179.654	5614.19	39.2993	5.44406	5.79529	33.8553	45.0946		21:35:08	2024-03-16 21:35:08	2a	0.007	0.032	0.032	174.815	5462.97	38.2408	5.29743	5.6392	32.9434	43.88		38.9101	45.0946	32.9434	44.6479	33.5199	0.446687	0.576527				20:34:05
											21:40:03	2024-03-16 21:40:03	2a	0.006	0.032	0.032	179.654	5614.19	33.6851	5.44406	5.79529	28.2411	39.4804		21:40:03	2024-03-16 21:40:03	2a	0.006	0.032	0.032	174.815	5462.97	32.7778	5.29743	5.6392	27.4804	38.417		33.3515	39.4804	27.4804	39.0894	27.9613	0.391076	0.480922				20:35:05
											21:45:07	2024-03-16 21:45:07	2a	0.006	0.032	0.032	179.654	5614.19	33.6851	5.44406	5.79529	28.2411	39.4804		21:45:07	2024-03-16 21:45:07	2a	0.006	0.032	0.032	174.815	5462.97	32.7778	5.29743	5.6392	27.4804	38.417		33.3515	39.4804	27.4804	39.0894	27.9613	0.391076	0.480922				20:36:10
											21:50:00	2024-03-16 21:50:00	2a	0.005	0.032	0.032	179.654	5614.19	28.071	5.44406	5.79529	22.6269	33.8662		21:50:00	2024-03-16 21:50:00	2a	0.005	0.032	0.032	174.815	5462.97	27.3149	5.29743	5.6392	22.0174	32.9541		27.7929	33.8662	22.0174	33.5308	22.4028	0.335464	0.385317				20:37:03
											21:55:04	2024-03-16 21:55:04	2a	0.004	0.032	0.032	179.654	5614.19	22.4568	5.44406	5.79529	17.0127	28.2521		21:55:04	2024-03-16 21:55:04	2a	0.004	0.032	0.032	174.815	5462.97	21.8519	5.29743	5.6392	16.5545	27.4911		22.2343	28.2521	16.5545	27.9722	16.8442	0.279852	0.289712				20:38:06
											22:00:07	2024-03-16 22:00:07	2a	0.004	0.032	0.032	179.654	5614.19	22.4568	5.44406	5.79529	17.0127	28.2521		22:00:07	2024-03-16 22:00:07	2a	0.004	0.032	0.032	174.815	5462.97	21.8519	5.29743	5.6392	16.5545	27.4911		22.2343	28.2521	16.5545	27.9722	16.8442	0.279852	0.289712				20:39:00
											22:05:09	2024-03-16 22:05:09	2a	0.004	0.032	0.032	179.654	5614.19	22.4568	5.44406	5.79529	17.0127	28.2521		22:05:09	2024-03-16 22:05:09	2a	0.004	0.032	0.032	174.815	5462.97	21.8519	5.29743	5.6392	16.5545	27.4911		22.2343	28.2521	16.5545	27.9722	16.8442	0.279852	0.289712				20:40:07
											22:10:02	2024-03-16 22:10:02	2a	0.004	0.032	0.032	179.654	5614.19	22.4568	5.44406	5.79529	17.0127	28.2521		22:10:02	2024-03-16 22:10:02	2a	0.004	0.032	0.032	174.815	5462.97	21.8519	5.29743	5.6392	16.5545	27.4911		22.2343	28.2521	16.5545	27.9722	16.8442	0.279852	0.289712				20:43:02
											22:15:03	2024-03-16 22:15:03	2a	0.004	0.032	0.032	179.654	5614.19	22.4568	5.44406	5.79529	17.0127	28.2521		22:15:03	2024-03-16 22:15:03	2a	0.004	0.032	0.032	174.815	5462.97	21.8519	5.29743	5.6392	16.5545	27.4911		22.2343	28.2521	16.5545	27.9722	16.8442	0.279852	0.289712				20:46:06
											22:20:06	2024-03-16 22:20:06	2a	0.004	0.032	0.032	179.654	5614.19	22.4568	5.44406	5.79529	17.0127	28.2521		22:20:06	2024-03-16 22:20:06	2a	0.004	0.032	0.032	174.815	5462.97	21.8519	5.29743	5.6392	16.5545	27.4911		22.2343	28.2521	16.5545	27.9722	16.8442	0.279852	0.289712				20:47:48
											22:25:04	2024-03-16 22:25:04	2a	0.004	0.032	0.032	179.654	5614.19	22.4568	5.44406	5.79529	17.0127	28.2521		22:25:04	2024-03-16 22:25:04	2a	0.004	0.032	0.032	174.815	5462.97	21.8519	5.29743	5.6392	16.5545	27.4911		22.2343	28.2521	16.5545	27.9722	16.8442	0.279852	0.289712				20:49:57
											22:30:07	2024-03-16 22:30:07	2a	0.004	0.032	0.032	179.654	5614.19	22.4568	5.44406	5.79529	17.0127	28.2521		22:30:07	2024-03-16 22:30:07	2a	0.004	0.032	0.032	174.815	5462.97	21.8519	5.29743	5.6392	16.5545	27.4911		22.2343	28.2521	16.5545	27.9722	16.8442	0.279852	0.289712				20:55:04
											22:35:01	2024-03-16 22:35:01	2a	0.004	0.032	0.032	179.654	5614.19	22.4568	5.44406	5.79529	17.0127	28.2521		22:35:01	2024-03-16 22:35:01	2a	0.004	0.032	0.032	174.815	5462.97	21.8519	5.29743	5.6392	16.5545	27.4911		22.2343	28.2521	16.5545	27.9722	16.8442	0.279852	0.289712				20:59:55
											22:40:05	2024-03-16 22:40:05	2a	0.004	0.032	0.032	179.654	5614.19	22.4568	5.44406	5.79529	17.0127	28.2521		22:40:05	2024-03-16 22:40:05	2a	0.004	0.032	0.032	174.815	5462.97	21.8519	5.29743	5.6392	16.5545	27.4911		22.2343	28.2521	16.5545	27.9722	16.8442	0.279852	0.289712				21:00:06
											22:45:06	2024-03-16 22:45:06	2a	0.004	0.032	0.032	179.654	5614.19	22.4568	5.44406	5.79529	17.0127	28.2521		22:45:06	2024-03-16 22:45:06	2a	0.004	0.032	0.032	174.815	5462.97	21.8519	5.29743	5.6392	16.5545	27.4911		22.2343	28.2521	16.5545	27.9722	16.8442	0.279852	0.289712				21:03:08
											22:50:07	2024-03-16 22:50:07	2a	0.004	0.032	0.032	179.654	5614.19	22.4568	5.44406	5.79529	17.0127	28.2521		22:50:07	2024-03-16 22:50:07	2a	0.004	0.032	0.032	174.815	5462.97	21.8519	5.29743	5.6392	16.5545	27.4911		22.2343	28.2521	16.5545	27.9722	16.8442	0.279852	0.289712				21:06:10
											22:55:02	2024-03-16 22:55:02	2a	0.004	0.032	0.032	179.654	5614.19	22.4568	5.44406	5.79529	17.0127	28.2521		22:55:02	2024-03-16 22:55:02	2a	0.004	0.032	0.032	174.815	5462.97	21.8519	5.29743	5.6392	16.5545	27.4911		22.2343	28.2521	16.5545	27.9722	16.8442	0.279852	0.289712				21:09:43
											23:00:03	2024-03-16 23:00:03	2a	0.004	0.032	0.032	179.654	5614.19	22.4568	5.44406	5.79529	17.0127	28.2521		23:00:03	2024-03-16 23:00:03	2a	0.004	0.032	0.032	174.815	5462.97	21.8519	5.29743	5.6392	16.5545	27.4911		22.2343	28.2521	16.5545	27.9722	16.8442	0.279852	0.289712				21:15:06
											23:05:04	2024-03-16 23:05:04	2a	0.003	0.032	0.032	179.654	5614.19	16.8426	5.44406	5.79529	11.3985	22.6379		23:05:04	2024-03-16 23:05:04	2a	0.003	0.032	0.032	174.815	5462.97	16.3889	5.29743	5.6392	11.0915	22.0281		16.6757	22.6379	11.0915	22.4136	11.2856	0.224241	0.194107				21:20:06
											23:10:03	2024-03-16 23:10:03	2a	0.003	0.032	0.032	179.654	5614.19	16.8426	5.44406	5.79529	11.3985	22.6379		23:10:03	2024-03-16 23:10:03	2a	0.003	0.032	0.032	174.815	5462.97	16.3889	5.29743	5.6392	11.0915	22.0281		16.6757	22.6379	11.0915	22.4136	11.2856	0.224241	0.194107				21:25:08
																																																	21:30:03
																																																	21:35:08
																																																	21:40:03
																																																	21:45:07
																																																	21:50:00
																																																	21:55:04
																																																	22:00:07
																																																	22:05:09
																																																	22:10:02
																																																	22:15:03
																																																	22:20:06
																																																	22:25:04
																																																	22:30:07
																																																	22:35:01
																																																	22:40:05
																																																	22:45:06
																																																	22:50:07
																																																	22:55:02
																																																	23:00:05
																																																	23:05:04
																																																	23:10:03
[truncated: 297 more columns]

[truncated: 2 more sheets: AUGUST ANGULAR UNCERTAINTY, VALUES FOR CORRELATION TESTING]
